# Supplementary material for: Various forms of double burden of malnutrition problems exist in rural Kenya
Source: Springer Nature journal article supplement (doi:10.1186/s12889-019-7882-y), 2019-11-21
Supplement: MOESM1 [file 12889_2019_7882_MOESM1_ESM.pdf]

## HOUSEHOLD SURVEY 2016

### AGRICULTURE AND DIETARY DIVERSITY IN AFRICA: AN APPLICATION OF RANDOMISED CONTROLLED TRIALS IN KISII AND NYAMIRA, KENYA.

Goettingen University-Germany, University of Nairobi-Kenya and Africa Harvest Biotech Foundation International (Africa Harvest) are carrying out a research on different aspects of agricultural development. We are currently doing a survey which aims to provide more understanding about farmers' production and marketing decisions, and nutrition and health status. Your participation in answering these questions is very much appreciated. Your responses will be **COMPLETELY CONFIDENTIAL** and will only be used for research purpose. If you indicate your voluntary consent by participating in this interview, may we begin?

|                                                                  |                 |                                                                      |                                                |
|------------------------------------------------------------------|-----------------|----------------------------------------------------------------------|------------------------------------------------|
| MODULE 0 – HOUSEHOLD ID.....                                     | 3               | <b><u>TARGET PERSON: GROUP MEMBER.....</u></b>                       | <b><u>18</u></b>                               |
| <b><u>TARGET PERSON: GROUP MEMBER OR HOUSEHOLD HEAD.....</u></b> | <b><u>4</u></b> | MODULE 18: SOCIAL CAPITAL ENDOWMENT.....                             | 18                                             |
| MODULE 1: HOUSEHOLD DEMOGRAPHIC INFORMATION.....                 | 4               | MODULE 14: COMMUNITY OUTREACH METHODS.....                           | 19                                             |
| MODULE 2: LAND HOLDING IN ACRES.....                             | 5               | MODULE 19: SOCIAL NETWORKS.....                                      | 22                                             |
| MODULE 3: NON-LABOUR PURCHASED INPUT USE.....                    | 7               | <b><u>TARGET PERSON: PERSON RESPONSIBLE FOR FOOD PREPARATION</u></b> | <b><u>30</u></b>                               |
| MODULE 4: CROP UTILIZATION.....                                  | 9               | MODULE 20: HOUSEHOLD FOOD CONSUMPTION.....                           | 30                                             |
| MODULE 5: LABOUR INPUTS.....                                     | 10              | <b><u>TARGET PERSON: MOTHER OR CARETAKER OF CHILD BETWEEN</u></b>    | <b><u>THE AGE OF SIX TO 59 MONTHS.....</u></b> |
| MODULE 6: VARIETY/BREED AWARENESS AND UP-TAKE.....               | 11              | MODULE 21: CHILD QUESTIONNAIRE – ONLY ONE CHILD WILL BE              | 34                                             |
| MODULE 7: VARIETY/BREED ATTRIBUTES, KNOWLEDGE & PERCEPTION.....  | 12              | CONSIDERED.....                                                      | 34                                             |
| MODULE 8: LIVESTOCK PRODUCTION AND MARKETING.....                | 13              | <b><u>1. TARGET PERSON: FIRST INDIVIDUAL.....</u></b>                | <b><u>37</u></b>                               |
| MODULE 9: HOUSEHOLD ASSETS.....                                  | 14              | MODULE 22/1- FIRST INDIVIDUAL QUESTIONNAIRE (1).....                 | 37                                             |
| MODULE 11: OTHER SOURCES OF INCOME AND TRANSFER.....             | 15              | MODULE 23/1 - DECISION MAKING.....                                   | 41                                             |
| MODULE 12: NON-FOOD EXPENDITURE.....                             | 16              | <b><u>2. TARGET PERSON: SECOND INDIVIDUAL.....</u></b>               | <b><u>42</u></b>                               |
| MODULE 13: INFORMATION ON CREDIT ACCESS.....                     | 16              | MODULE 22/1- SECOND INDIVIDUAL QUESTIONNAIRE (2).....                | 42                                             |
| MODULE 15: ACCESS TO SOCIOECONOMIC INFRASTRUCTURE.....           | 16              | MODULE 23/2 - DECISION MAKING.....                                   | 47                                             |
| MODULE 17: SHOCKS EXPERIENCED BY THE HOUSEHOLD.....              | 17              |                                                                      |                                                |

Questionnaire number (adda\_hhid) \_\_\_\_\_

We are researchers from Göttingen University-Germany, University of Nairobi-Kenya and Africa Harvest Biotech Foundation International (Africa Harvest). We are conducting research that aims to improve the knowledge on agriculture-nutrition linkages in the African small farm sector. We are particularly interested in understanding the mechanisms through which farmers can effectively adopt agricultural technologies that may improve their nutrition and health. We are currently conducting the first round of the survey last year and now will do a follow-up round.

This informed consent is for smallholder farmers [like you] who belong to farmer groups and have engaged in farming activities during the last one year (October, 2015 to September, 2016). We are inviting you to participate in this research that mainly focuses on nutrition and health status of smallholder farmers in this area. We will ask you and some members of your household detailed questions on various topics related to agriculture, social networks, nutrition and health. We will also need to take measurements of the height and weight of selected adults and children below 5 years of age in your household. Your participation in this interview is entirely voluntary. Your responses will be treated with utmost confidentiality and the data will be used for research purposes only.

Do you have any questions that we need to clarify? [Make clarifications in case there are questions] If *No*, do you agree to take part in this survey, including the interviews and the measurements of adults and children?

If *Yes* let the potential respondent write name and sign below

Name \_\_\_\_\_

Signature \_\_\_\_\_

**MODULE 0 – HOUSEHOLD ID**

|   |                    |  |    |                 |  |                                                                |                          |  |
|---|--------------------|--|----|-----------------|--|----------------------------------------------------------------|--------------------------|--|
| 1 | Household ID       |  | 8  | County          |  | 12                                                             | <b>First visit date</b>  |  |
| 2 | Group ID           |  | 9  | Sub-County      |  | 1=Interview completed 2= Interview partly completed 3= Specify |                          |  |
| 3 | Date of interview  |  | 18 | Ward            |  | 14                                                             | <b>Enumerator Name</b>   |  |
| 4 | Start Time (24 Hr) |  | 17 | Division        |  | 13                                                             | <b>Second visit date</b> |  |
| 5 | End time (24 Hr)   |  | 10 | Village         |  | 1=Interview completed 2= Interview partly completed 3= Specify |                          |  |
| 6 | HH head Full Name  |  | 11 | GPS Coordinates |  | 15                                                             | <b>Enumerator Name 1</b> |  |
| 7 | Cell phone number  |  |    |                 |  | 16                                                             | <b>Enumerator Name 2</b> |  |

**TARGET PERSON: GROUP MEMBER OR HOUSEHOLD HEAD**

**Respondent MEMID:** \_\_\_\_\_

**MODULE 1: HOUSEHOLD DEMOGRAPHIC INFORMATION** (reference period between 1st Oct 2015 and 30th Sep 2016)

Household composition: Please list all household members (All those who are under the care of household head in terms of food and shelter provision, and those who normally live and eat their meals together), starting with the household head.

| 1     | 2                     | 3                                | 4                                    | 5            | 6                                                         | 7                               | 10                                                               | 11                                                   | 12                                                                                                      | 13                                                            | 14                                                                                     |
|-------|-----------------------|----------------------------------|--------------------------------------|--------------|-----------------------------------------------------------|---------------------------------|------------------------------------------------------------------|------------------------------------------------------|---------------------------------------------------------------------------------------------------------|---------------------------------------------------------------|----------------------------------------------------------------------------------------|
| MEMID | Name of the HH member | Gender<br><i>M = 1<br/>F = 0</i> | R/ship with HH head<br><br>(Codes A) | Age in years | Years of formal education<br><br>(Highest level attained) | Marital Status<br><br>(Codes B) | # of months in the last 12 months [NAME] has been away from home | Main Occupation based on time spent<br><br>(Codes D) | Household farm labour contribution (for those above 16 years of age in the upper category)<br>(Codes E) | How many hours per day are dedicated to farm activities? (hr) | If you had a larger farm how many hours per day would be dedicated to farm activities? |
|       |                       |                                  | <b>1</b>                             |              |                                                           |                                 |                                                                  |                                                      |                                                                                                         |                                                               |                                                                                        |
|       |                       |                                  |                                      |              |                                                           |                                 |                                                                  |                                                      |                                                                                                         |                                                               |                                                                                        |
|       |                       |                                  |                                      |              |                                                           |                                 |                                                                  |                                                      |                                                                                                         |                                                               |                                                                                        |
|       |                       |                                  |                                      |              |                                                           |                                 |                                                                  |                                                      |                                                                                                         |                                                               |                                                                                        |
|       |                       |                                  |                                      |              |                                                           |                                 |                                                                  |                                                      |                                                                                                         |                                                               |                                                                                        |
|       |                       |                                  |                                      |              |                                                           |                                 |                                                                  |                                                      |                                                                                                         |                                                               |                                                                                        |
|       |                       |                                  |                                      |              |                                                           |                                 |                                                                  |                                                      |                                                                                                         |                                                               |                                                                                        |
|       |                       |                                  |                                      |              |                                                           |                                 |                                                                  |                                                      |                                                                                                         |                                                               |                                                                                        |
|       |                       |                                  |                                      |              |                                                           |                                 |                                                                  |                                                      |                                                                                                         |                                                               |                                                                                        |
|       |                       |                                  |                                      |              |                                                           |                                 |                                                                  |                                                      |                                                                                                         |                                                               |                                                                                        |
|       |                       |                                  |                                      |              |                                                           |                                 |                                                                  |                                                      |                                                                                                         |                                                               |                                                                                        |
|       |                       |                                  |                                      |              |                                                           |                                 |                                                                  |                                                      |                                                                                                         |                                                               |                                                                                        |
|       |                       |                                  |                                      |              |                                                           |                                 |                                                                  |                                                      |                                                                                                         |                                                               |                                                                                        |
|       |                       |                                  |                                      |              |                                                           |                                 |                                                                  |                                                      |                                                                                                         |                                                               |                                                                                        |
|       |                       |                                  |                                      |              |                                                           |                                 |                                                                  |                                                      |                                                                                                         |                                                               |                                                                                        |
|       |                       |                                  |                                      |              |                                                           |                                 |                                                                  |                                                      |                                                                                                         |                                                               |                                                                                        |
|       |                       |                                  |                                      |              |                                                           |                                 |                                                                  |                                                      |                                                                                                         |                                                               |                                                                                        |
|       |                       |                                  |                                      |              |                                                           |                                 |                                                                  |                                                      |                                                                                                         |                                                               |                                                                                        |
|       |                       |                                  |                                      |              |                                                           |                                 |                                                                  |                                                      |                                                                                                         |                                                               |                                                                                        |
|       |                       |                                  |                                      |              |                                                           |                                 |                                                                  |                                                      |                                                                                                         |                                                               |                                                                                        |
|       |                       |                                  |                                      |              |                                                           |                                 |                                                                  |                                                      |                                                                                                         |                                                               |                                                                                        |

- Code A**  
 1= Head  
 2=Spouse  
 3=Son/daughter  
 4=Father/mother  
 5=Sister/brother  
 6=Grandchildren  
 7=Grandparents  
 8=Step children  
 9=Step parents  
 10 = Father/mother-in-law  
 11 =Sister/brother-in-law  
 12 = House girl  
 13 =Farm labourer  
 16=Nephew/Niece  
 14 = Other relative  
 15= Other Unrelated

- Code B**  
 1= Married-monogamous  
 2= Married polygamous  
 3= Single  
 4= Divorced/separated  
 5= Widow/widower

- Code D**  
 0= None  
 1= Farming (crop + livestock)  
 2= Casual labour on-other farm  
 3= Casual labour off-farm  
 4= Self-employed off-farm

- Code E**  
 5= Salaried employment (civil servant etc)  
 6=Student/school  
 77= Other (Specify)\_\_\_\_\_

- Code E**  
 1= Part time  
 2= Fulltime  
 3=Does not work on farm

**MODULE 2: LAND HOLDING IN ACRES** (*period between 1<sup>st</sup> Oct 2015 and 30<sup>th</sup> Sep 2016*)

2.1. How much land do you own in acres? \_\_\_\_\_

2.2. How much of your total land is under homestead? \_\_\_\_\_

2.3. Do you have a title deed for your land? \_\_\_\_\_ Yes=1 (all land), No=0 (no land), Partly=3

| Land category           | Short rain season<br>(Oct-Nov 2015) |        | Long rain season<br>(Mar-Apr 2016) |        |
|-------------------------|-------------------------------------|--------|------------------------------------|--------|
|                         | Cultivated                          | Fallow | Cultivated                         | Fallow |
| 1. Own land (A)         |                                     |        |                                    |        |
| 2. Rented in (B)        |                                     |        |                                    |        |
| 3. Rented out (C)       |                                     |        |                                    |        |
| 4. Total irrigated land |                                     |        |                                    |        |

2.4. What is the average cost of renting land per acre (Ksh/per year)? \_\_\_\_\_

**CODES FOR MODULE 3**

**Codes A**

- 1 Maize
- 2 Rice
- 3 Sorghum
- 4 Millet
- 5 Cassava
- 6 KK 15 Beans
- 7 Other Field beans
- 8 Bananas
- 9 Cabbage
- 10 Cowpea
- 11 Groundnut
- 12 Soybean
- 13 Sweet potatoes
- 14 Orange Fleshed Sweet Potatoes (OFSP)
- 15 Black night shade
- 16 Sugarcane
- 17 Pineapple
- 18 Jute Mallow (Omutere)
- 19 Amaranthas leaves (Emboga)
- 20 Pumpkin leaves
- 21 Sukuma wiki (Kales)
- 22 Carrots
- 23 Passion Fruit
- 24 Irish potato
- 25 Bean leaves
- 26 Tea
- 27 Onion
- 29 Coffee
- 30 Napier grass
- 31 Avocado
- 32 Spider Plant
- 33 Vine Spinache
- 34 Pumpkin
- 35 Trees
- 36 Mangoes
- 37 Guava
- 38 Wheat
- 39 Paw Paw
- 40 Tomatoes
- 41 Loquat
- 42 Green grams

- 43 Tree Tomato
- 44 Strawberry
- 45 Spring Onion
- 46 Desmodium
- 47 Spinach
- 48 Arrow Roots
- 49 Green Peas
- 50 Physallis/Gooseberry
- 51 Corriander
- 52 Capsicum
- 53 Pepper
- 54 Grass
- 55 Butternut
- 56 Lemon
- 57 Beetroot
- 58 Cumcumber
- 59 Water melon
- 60 Tree Seedlings
- 61 Raspberry
- 63 Pyrethrum
- 64 Cowpea Leaves
- 77 Other \_\_\_\_\_
- 78 Other \_\_\_\_\_
- 79 Other \_\_\_\_\_

**Codes B**

0. Local
1. Improved
2. Mixture

**Codes C**

1. Kilogram
2. Litre
3. 90 Kg bag (40 Gorogoro)
4. 50 Kg bag
5. 25 Kg bag
6. Gorogoro (2.25 kg)
7. Debe (18 kg/ 8 Gorogoro)
8. Wheelbarrow
9. Ox-cart
10. Bunch (bananas)
11. Piece/number
12. Not yet harvested (for perennials only)
13. Stools
14. Glass (250 gr)
15. Suckers
16. Bucket
17. Ml
18. Spoonful
19. 5 kg bag
20. 10 kg Bag
22. Yellow paper bag
23. Grams
24. Pick up
25. Trees
26. Green paper bag
27. Lines
28. Packet (250g)
29. Crates
30. Bundle
31. Handful
32. Cuttings
33. Vines
35. Lorry

36. Seeds
37. Bushes
38. 45kg bag
39. Bottle top
40. Seedlings
41. Tonne
42. 500 Ml glass
45. Cobs
46. Poles
47. Crop failure
48. Black paper bag
- 77 Other (specify) \_\_\_\_\_

MODULE 3: NON-LABOUR PURCHASED INPUT USE (1<sup>st</sup> Oct 2015 and 30<sup>th</sup> Sep 2016 planting seasons, record separately by plots)

| 1<br>Plot Code<br>(Use<br>alphabets<br>in Cap) | 2<br>Crop<br>Grown<br>A | 3<br>Land<br>under<br>crop<br>(acre<br>) | 12<br>Intercro<br>p<br>(1=Yes;<br>0=No) | 4<br>Numbe<br>r of<br>trees | 5<br>Crop<br>variety<br>B | 6<br>Seed |       |             | 7<br>Fertiliser(planting) (Fill once for<br>intercrops) |       |             | 8<br>Oxen/<br>tractor<br>hire<br>Cost<br>Ksh | 9<br>Farm manure (Fill once for<br>intercrops) |      |             | 10<br>Pesticides/herbicides |       |             | 11<br>Crop output |      |
|------------------------------------------------|-------------------------|------------------------------------------|-----------------------------------------|-----------------------------|---------------------------|-----------|-------|-------------|---------------------------------------------------------|-------|-------------|----------------------------------------------|------------------------------------------------|------|-------------|-----------------------------|-------|-------------|-------------------|------|
|                                                |                         |                                          |                                         |                             |                           | C         |       |             | C                                                       |       |             |                                              | C                                              |      |             | C                           |       |             | C                 |      |
|                                                |                         |                                          |                                         |                             |                           | Qty       | units | Price /Unit | Qty                                                     | Units | Price /Unit |                                              | Qty                                            | unit | Price /unit | Qty                         | units | Price /unit | Qty               | Unit |
| <b>Short Rains</b>                             |                         |                                          |                                         |                             |                           |           |       |             |                                                         |       |             |                                              |                                                |      |             |                             |       |             |                   |      |
|                                                | KK 15 (6)               |                                          |                                         |                             |                           |           |       |             |                                                         |       |             |                                              |                                                |      |             |                             |       |             |                   |      |
|                                                |                         |                                          |                                         |                             |                           |           |       |             |                                                         |       |             |                                              |                                                |      |             |                             |       |             |                   |      |
|                                                |                         |                                          |                                         |                             |                           |           |       |             |                                                         |       |             |                                              |                                                |      |             |                             |       |             |                   |      |
|                                                |                         |                                          |                                         |                             |                           |           |       |             |                                                         |       |             |                                              |                                                |      |             |                             |       |             |                   |      |
|                                                |                         |                                          |                                         |                             |                           |           |       |             |                                                         |       |             |                                              |                                                |      |             |                             |       |             |                   |      |
|                                                |                         |                                          |                                         |                             |                           |           |       |             |                                                         |       |             |                                              |                                                |      |             |                             |       |             |                   |      |
|                                                |                         |                                          |                                         |                             |                           |           |       |             |                                                         |       |             |                                              |                                                |      |             |                             |       |             |                   |      |
|                                                |                         |                                          |                                         |                             |                           |           |       |             |                                                         |       |             |                                              |                                                |      |             |                             |       |             |                   |      |
|                                                |                         |                                          |                                         |                             |                           |           |       |             |                                                         |       |             |                                              |                                                |      |             |                             |       |             |                   |      |
|                                                |                         |                                          |                                         |                             |                           |           |       |             |                                                         |       |             |                                              |                                                |      |             |                             |       |             |                   |      |
|                                                |                         |                                          |                                         |                             |                           |           |       |             |                                                         |       |             |                                              |                                                |      |             |                             |       |             |                   |      |
|                                                |                         |                                          |                                         |                             |                           |           |       |             |                                                         |       |             |                                              |                                                |      |             |                             |       |             |                   |      |
|                                                |                         |                                          |                                         |                             |                           |           |       |             |                                                         |       |             |                                              |                                                |      |             |                             |       |             |                   |      |
|                                                |                         |                                          |                                         |                             |                           |           |       |             |                                                         |       |             |                                              |                                                |      |             |                             |       |             |                   |      |
|                                                |                         |                                          |                                         |                             |                           |           |       |             |                                                         |       |             |                                              |                                                |      |             |                             |       |             |                   |      |
|                                                |                         |                                          |                                         |                             |                           |           |       |             |                                                         |       |             |                                              |                                                |      |             |                             |       |             |                   |      |
| <b>Long Rains</b>                              |                         |                                          |                                         |                             |                           |           |       |             |                                                         |       |             |                                              |                                                |      |             |                             |       |             |                   |      |
|                                                | KK 15 (6)               |                                          |                                         |                             |                           |           |       |             |                                                         |       |             |                                              |                                                |      |             |                             |       |             |                   |      |
|                                                |                         |                                          |                                         |                             |                           |           |       |             |                                                         |       |             |                                              |                                                |      |             |                             |       |             |                   |      |
|                                                |                         |                                          |                                         |                             |                           |           |       |             |                                                         |       |             |                                              |                                                |      |             |                             |       |             |                   |      |
|                                                |                         |                                          |                                         |                             |                           |           |       |             |                                                         |       |             |                                              |                                                |      |             |                             |       |             |                   |      |
|                                                |                         |                                          |                                         |                             |                           |           |       |             |                                                         |       |             |                                              |                                                |      |             |                             |       |             |                   |      |
|                                                |                         |                                          |                                         |                             |                           |           |       |             |                                                         |       |             |                                              |                                                |      |             |                             |       |             |                   |      |
|                                                |                         |                                          |                                         |                             |                           |           |       |             |                                                         |       |             |                                              |                                                |      |             |                             |       |             |                   |      |
|                                                |                         |                                          |                                         |                             |                           |           |       |             |                                                         |       |             |                                              |                                                |      |             |                             |       |             |                   |      |
|                                                |                         |                                          |                                         |                             |                           |           |       |             |                                                         |       |             |                                              |                                                |      |             |                             |       |             |                   |      |
|                                                |                         |                                          |                                         |                             |                           |           |       |             |                                                         |       |             |                                              |                                                |      |             |                             |       |             |                   |      |
|                                                |                         |                                          |                                         |                             |                           |           |       |             |                                                         |       |             |                                              |                                                |      |             |                             |       |             |                   |      |
|                                                |                         |                                          |                                         |                             |                           |           |       |             |                                                         |       |             |                                              |                                                |      |             |                             |       |             |                   |      |
|                                                |                         |                                          |                                         |                             |                           |           |       |             |                                                         |       |             |                                              |                                                |      |             |                             |       |             |                   |      |
|                                                |                         |                                          |                                         |                             |                           |           |       |             |                                                         |       |             |                                              |                                                |      |             |                             |       |             |                   |      |
|                                                |                         |                                          |                                         |                             |                           |           |       |             |                                                         |       |             |                                              |                                                |      |             |                             |       |             |                   |      |
|                                                |                         |                                          |                                         |                             |                           |           |       |             |                                                         |       |             |                                              |                                                |      |             |                             |       |             |                   |      |
|                                                |                         |                                          |                                         |                             |                           |           |       |             |                                                         |       |             |                                              |                                                |      |             |                             |       |             |                   |      |
|                                                |                         |                                          |                                         |                             |                           |           |       |             |                                                         |       |             |                                              |                                                |      |             |                             |       |             |                   |      |
|                                                |                         |                                          |                                         |                             |                           |           |       |             |                                                         |       |             |                                              |                                                |      |             |                             |       |             |                   |      |
|                                                |                         |                                          |                                         |                             |                           |           |       |             |                                                         |       |             |                                              |                                                |      |             |                             |       |             |                   |      |
| <b>Perennial Crops</b>                         |                         |                                          |                                         |                             |                           |           |       |             |                                                         |       |             |                                              |                                                |      |             |                             |       |             |                   |      |
|                                                |                         |                                          |                                         |                             |                           |           |       |             |                                                         |       |             |                                              |                                                |      |             |                             |       |             |                   |      |
|                                                |                         |                                          |                                         |                             |                           |           |       |             |                                                         |       |             |                                              |                                                |      |             |                             |       |             |                   |      |
|                                                |                         |                                          |                                         |                             |                           |           |       |             |                                                         |       |             |                                              |                                                |      |             |                             |       |             |                   |      |
|                                                |                         |                                          |                                         |                             |                           |           |       |             |                                                         |       |             |                                              |                                                |      |             |                             |       |             |                   |      |
|                                                |                         |                                          |                                         |                             |                           |           |       |             |                                                         |       |             |                                              |                                                |      |             |                             |       |             |                   |      |
|                                                |                         |                                          |                                         |                             |                           |           |       |             |                                                         |       |             |                                              |                                                |      |             |                             |       |             |                   |      |
|                                                |                         |                                          |                                         |                             |                           |           |       |             |                                                         |       |             |                                              |                                                |      |             |                             |       |             |                   |      |
|                                                |                         |                                          |                                         |                             |                           |           |       |             |                                                         |       |             |                                              |                                                |      |             |                             |       |             |                   |      |
|                                                |                         |                                          |                                         |                             |                           |           |       |             |                                                         |       |             |                                              |                                                |      |             |                             |       |             |                   |      |
|                                                |                         |                                          |                                         |                             |                           |           |       |             |                                                         |       |             |                                              |                                                |      |             |                             |       |             |                   |      |
|                                                |                         |                                          |                                         |                             |                           |           |       |             |                                                         |       |             |                                              |                                                |      |             |                             |       |             |                   |      |
|                                                |                         |                                          |                                         |                             |                           |           |       |             |                                                         |       |             |                                              |                                                |      |             |                             |       |             |                   |      |
|                                                |                         |                                          |                                         |                             |                           |           |       |             |                                                         |       |             |                                              |                                                |      |             |                             |       |             |                   |      |

CODES FOR MODULE 4 (period between 1<sup>st</sup> Oct 2015 and 30<sup>th</sup> Sep 2016)

**Codes A**

- 1 Maize
- 2 Rice
- 3 Sorghum
- 4 Millet
- 5 Cassava
- 6 KK 15 Beans
- 7 Other Field beans
- 8 Bananas
- 9 Cabbage
- 10 Cowpea
- 11 Groundnut
- 12 Soybean
- 13 Sweet potatoes
- 14 Orange Fleshed Sweet Potatoes (OFSP)
- 15 Black night shade
- 16 Sugarcane
- 17 Pineapple
- 18 Jute Mallow (Omutere)
- 19 Amaranthas leaves (Emboga)
- 20 Pumpkin leaves
- 21 Sukuma wiki (Kales)
- 22 Carrots
- 23 Passion Fruit
- 24 Irish potato
- 25 Bean leaves
- 26 Tea
- 27 Onion
- 29 Coffee
- 30 Napier grass
- 31 Avocado
- 32 Spider Plant
- 33 Vine Spinache
- 34 Pumpkin
- 35 Trees
- 36 Mangoes
- 37 Guava
- 38 Wheat
- 39 Paw Paw
- 40 Tomatoes
- 41 Loquat
- 42 Green grams

- 43 Tree Tomato
- 44 Strawberry
- 45 Spring Onion
- 46 Desmodium
- 47 Spinach
- 48 Arrow Roots
- 49 Green Peas
- 50 Physallis/Gooseberry
- 51 Corriander
- 52 Capsicum
- 53 Pepper
- 54 Grass
- 55 Butternut
- 56 Lemon
- 57 Beetroot
- 58 Cumcumber
- 59 Water melon
- 60 Tree Seedlings
- 61 Raspberry
- 63 Pyrethrum
- 64 CowPea Leaves
- 77 Other \_\_\_\_\_
- 78 Other \_\_\_\_\_
- 79 Other \_\_\_\_\_

**Codes C**

1. Kilogram
2. Litre
3. 90 Kg bag (40 Gorogoro)
4. 50 Kg bag
5. 25 Kg bag
6. Gorogoro (2.25 kg)
7. Debe (18 kg/ 8 Gorogoro)
8. Wheelbarrow
9. Ox-cart
10. Bunch (bananas)
11. Piece/number
12. Not yet harvested (for perennials only)
13. Stools
14. Glass
15. Suckers
16. Bucket
17. Ml
18. Spoonful
19. 5 kg bag
20. 10 kg Bag
22. Yellow paper bag
23. Grams
24. Pick up
25. Trees
26. Green paper bag
27. Lines
28. Packet (250g)
29. Crates
30. Bundle
31. Handful
32. Cuttings
33. Vines
35. Lorry

36. Seeds
37. Bushes
38. 45kg bag
39. Bottle top
40. Seedlings
41. Tonne
42. 500 MI glass
45. Cobs
46. Poles
47. Crop failure
48. Black paper bag
- 77 Other (specify) \_\_\_\_\_

**Codes D**

1. Farm gate
2. Village market
3. Main market
4. Collection center
77. Other (specify) \_\_\_\_\_

**Codes E**

1. Own bicycle
2. Bodaboda
3. Hired truck
4. PSV
5. Donkey/oxen
6. Walking
7. Own truck
8. Taxi
- 77 Other (sp.)
99. NA

**Code F**

1. Male household head
2. Female household head
3. Female spouse
4. Joint decision
5. Male spouse
- 77 Other (specify) \_\_\_\_\_





4.1 How easily can you access the market for sale of your produce (crop and or livestock)? *(Circle the applicable)*

1. Very easy 2. Easy 3. Difficult 4. Very difficult

4.2 Rank three most important market access constraints, if there exists any *(Prompt Codes G below)* 1. \_\_\_\_\_ 2. \_\_\_\_\_ 3. \_\_\_\_\_

**Codes G:** 1. Poor infrastructure 2. Distant markets 3. Poor market prices 4. Cheating on quality standards/weighing scales 5. Lack of contracts or reliable buyers 6. Exploitative middlemen  
7. Other (specify): \_\_\_\_\_

4.7 In the last one year did you order for: 1 KK15 \_\_\_\_ (1. Yes; 0. No); 2. Kuroiler chicken \_\_\_\_ (1. Yes; 0. No);

**If the respondent is not growing KK 15 beans, skip to module 5**

4.3 How easily can you market your KK15/beans? *(Circle the applicable)*

1. Very easy 2. Easy 3. Difficult 4. Very difficult

4.4 What is the **MAIN REASON** for your answer in 4.3 above *(Circle the applicable)*

1. Distance to market 2. Colour of beans 3. Prices 4. Yield 5. Taste 6. Pest and disease resistance 7. Cooking quality 8. Nutritional value

7. Others (specify) \_\_\_\_\_ -99 N/A

4.5 When did you first order the KK15 bean seed? Date \_\_\_\_\_ Month \_\_\_\_\_

4.6 When did you receive KK 15 seeds for the first order? Date \_\_\_\_\_ Month \_\_\_\_\_

**MODULE 5: LABOUR INPUTS** (01.Oct 2015 to 30. Sept 2016 planting seasons, record **total man hours** worked by plot)

| 1                  | 2                  | 3                                      | 4                                                                                                                                                                                                                 | 5     |
|--------------------|--------------------|----------------------------------------|-------------------------------------------------------------------------------------------------------------------------------------------------------------------------------------------------------------------|-------|
| <b>Plot code</b>   | Plot size in acres | Plot manager<br>(F=0, M=1;<br>Joint=3) | Ploughing & harrowing Planting & thinning Applying fertiliser, Pesticide application (1 <sup>st</sup> and 2 <sup>nd</sup> ) Weeding (1 <sup>st</sup> and 2 <sup>nd</sup> ) Harvesting /Threshing/shelling/bagging | Hired |
|                    |                    |                                        | Family                                                                                                                                                                                                            |       |
| <b>Short Rains</b> |                    |                                        |                                                                                                                                                                                                                   |       |
| A                  |                    |                                        |                                                                                                                                                                                                                   |       |
| B                  |                    |                                        |                                                                                                                                                                                                                   |       |
| C                  |                    |                                        |                                                                                                                                                                                                                   |       |
| D                  |                    |                                        |                                                                                                                                                                                                                   |       |
| E                  |                    |                                        |                                                                                                                                                                                                                   |       |
| F                  |                    |                                        |                                                                                                                                                                                                                   |       |
| G                  |                    |                                        |                                                                                                                                                                                                                   |       |
| H                  |                    |                                        |                                                                                                                                                                                                                   |       |
| <b>Long Rains</b>  |                    |                                        |                                                                                                                                                                                                                   |       |
| A                  |                    |                                        |                                                                                                                                                                                                                   |       |
| B                  |                    |                                        |                                                                                                                                                                                                                   |       |
| C                  |                    |                                        |                                                                                                                                                                                                                   |       |
| D                  |                    |                                        |                                                                                                                                                                                                                   |       |
| E                  |                    |                                        |                                                                                                                                                                                                                   |       |
| F                  |                    |                                        |                                                                                                                                                                                                                   |       |
| G                  |                    |                                        |                                                                                                                                                                                                                   |       |
| H                  |                    |                                        |                                                                                                                                                                                                                   |       |

5.6 What is the average daily wage rate for men and women in this village? Men \_\_\_\_\_ Ksh/per day Women \_\_\_\_\_ Ksh/per day

5.7 Given all the family labour (manual) available in your household, what is the **maximum land size** in acres that you could potentially cultivate and keep under livestock? \_\_\_\_\_

**MODULE 6: VARIETY/BREED AWARENESS AND UP-TAKE**

|   | 1                              | 2                                                                                                    | 3                                                                      | 14                                                                               | 4                                                                                           | 15                                                                   | 5                                                                                   | 6                                                                                          | 7                                                                            | 8                                                    | 9                                                                                                | 10                                                                                                          | 11                                         | 12                                                                                    | 13                                                              |
|---|--------------------------------|------------------------------------------------------------------------------------------------------|------------------------------------------------------------------------|----------------------------------------------------------------------------------|---------------------------------------------------------------------------------------------|----------------------------------------------------------------------|-------------------------------------------------------------------------------------|--------------------------------------------------------------------------------------------|------------------------------------------------------------------------------|------------------------------------------------------|--------------------------------------------------------------------------------------------------|-------------------------------------------------------------------------------------------------------------|--------------------------------------------|---------------------------------------------------------------------------------------|-----------------------------------------------------------------|
|   | New breed/variety/technologies | Have you ever heard of this variety/breed?<br>(1=Yes; 0=No) <i>If No skip to the next technology</i> | Main source of information on the new variety/breed?<br><b>Codes A</b> | How easily can you obtain information from <b>main source</b> ?<br><b>Code D</b> | Have you ever planted /kept this variety/breed?<br>(1=Yes; 0=No)<br><i>If NO, skip to 5</i> | If yes, name the most important reason for adopting<br><b>Code E</b> | If No to Q4, what was the main reason?<br><b>Codes C</b><br><i>Then Skip to Q10</i> | What was the <b>main</b> source of breed kept/variety planted that year?<br><b>Codes B</b> | Number of seasons the variety has been planted, <b>since first</b> planting? | Number of years /variety/breed has been planted/kept | If you did not plant this variety/keep breed in 2016 what was the main reason?<br><b>Codes C</b> | Will you plant the variety/keep the breed in future? (1=Yes; 0=No, 88=don't know) <i>if Yes skip to Q12</i> | What is the main reason?<br><b>Codes C</b> | Are you aware of the nutritional value of this variety or breed?<br>(yes = 1, No = 0) | If yes to Q12 what was the source of information? <b>Code A</b> |
| 3 | Kuroiler chicken               |                                                                                                      |                                                                        |                                                                                  |                                                                                             |                                                                      |                                                                                     |                                                                                            |                                                                              |                                                      |                                                                                                  |                                                                                                             |                                            |                                                                                       |                                                                 |
| 4 | Beans(KK15)                    |                                                                                                      |                                                                        |                                                                                  |                                                                                             |                                                                      |                                                                                     |                                                                                            |                                                                              |                                                      |                                                                                                  |                                                                                                             |                                            |                                                                                       |                                                                 |

|                                                                                                                                                                                                                                                                                                                                                              |                                                                                                                                                                                                                                                                                                  |                                                                                                                                                                                                                                                                                                                                                                                                                                                                                                           |                                                                                           |                                                                                                                                                                                                                                                                                                                                                                                                                                                                                                                                                                           |
|--------------------------------------------------------------------------------------------------------------------------------------------------------------------------------------------------------------------------------------------------------------------------------------------------------------------------------------------------------------|--------------------------------------------------------------------------------------------------------------------------------------------------------------------------------------------------------------------------------------------------------------------------------------------------|-----------------------------------------------------------------------------------------------------------------------------------------------------------------------------------------------------------------------------------------------------------------------------------------------------------------------------------------------------------------------------------------------------------------------------------------------------------------------------------------------------------|-------------------------------------------------------------------------------------------|---------------------------------------------------------------------------------------------------------------------------------------------------------------------------------------------------------------------------------------------------------------------------------------------------------------------------------------------------------------------------------------------------------------------------------------------------------------------------------------------------------------------------------------------------------------------------|
| <p><b>Code A</b></p> <p>1= Farmer Coop/Union<br/>2= Farmer group<br/>3= Extension staff/office<br/>4= Other farmers (neighbours/relative)<br/>5= Market (e.g. Agro vet/stockist)<br/>6= Radio programs<br/>7= Research centre (trials/demos)<br/>(name _____)<br/>8= NGO/CBO (name _____)<br/>9= Health centre/Practitioner<br/>77= Other(specify _____)</p> | <p><b>Code B</b></p> <p>1= NGO free (name _____)<br/>2= NGO subsidy (specify_____)<br/>3= Extension staff demo plots<br/>4= Other farmers<br/>5= Market (Agrovet/local trader/stockist)<br/>6= Farmer group/coop<br/>7=Agricultural association/training centre<br/>77= Other(specify _____)</p> | <p><b>Code C</b></p> <p>1= Seed not available<br/>2=Day old chicks not available<br/>3=Lacked cash to buy seed/DOCs<br/>4= Lacked credit to buy seed/DOCs<br/>5= Prefer other varieties/breeds<br/>6=Susceptible to diseases/pests</p> <p>7=Poor taste<br/>8=Low yielding/lays fewer eggs<br/>9=Late maturing /longer maturity period<br/>10=Low market prices/demand<br/>11=High input requirements<br/>12=Limited land to experiment/plant<br/>13= Limited information<br/>77= Other(specify _____)</p> | <p><b>Code D</b></p> <p>1=Very easy<br/>2= Easy<br/>3=Difficult<br/>4= Very difficult</p> | <p><b>Code E</b></p> <p>1= Seed easily available<br/>2= Day old chicks easily available<br/>3= Availabiliy of cash to buy seed/DOCs<br/>4= Availability of credit to buy seed/DOCs<br/>5= Preference KK<br/>15/Kuroiler<br/>6= Resistance to diseases/pests</p> <p>7= Good taste<br/>8= High yielding/lays many eggs<br/>9= Early maturing /shorter maturity period<br/>10= High market prices/demand<br/>11= Lower input requirements<br/>12= Adequate land to experiment/plant<br/>13= Sufficient information<br/>14= Seed/DOC Subsidy<br/>77= Other(specify _____)</p> |
|--------------------------------------------------------------------------------------------------------------------------------------------------------------------------------------------------------------------------------------------------------------------------------------------------------------------------------------------------------------|--------------------------------------------------------------------------------------------------------------------------------------------------------------------------------------------------------------------------------------------------------------------------------------------------|-----------------------------------------------------------------------------------------------------------------------------------------------------------------------------------------------------------------------------------------------------------------------------------------------------------------------------------------------------------------------------------------------------------------------------------------------------------------------------------------------------------|-------------------------------------------------------------------------------------------|---------------------------------------------------------------------------------------------------------------------------------------------------------------------------------------------------------------------------------------------------------------------------------------------------------------------------------------------------------------------------------------------------------------------------------------------------------------------------------------------------------------------------------------------------------------------------|

**MODULE 7: VARIETY/BREED ATTRIBUTES, KNOWLEDGE & PERCEPTION**

*Instructions: Only ask the following questions to farmers who have ever heard or grown or kept the new technologies (listed below).*

*If Yes, ask for his/her perception of the performance of the technology (ies) against the listed attributes compared to his/her preferred local variety /breed. Please mark the respondent's response with a tick in the appropriate cells below. If No, skip to the next module.*

|   | 1                                                                    | 2                                                                             |              |                      |                   | 3                                                                             |              |                      |                   |
|---|----------------------------------------------------------------------|-------------------------------------------------------------------------------|--------------|----------------------|-------------------|-------------------------------------------------------------------------------|--------------|----------------------|-------------------|
|   |                                                                      | <i>Kuroiler chicken</i>                                                       |              |                      |                   | <i>Beans (KK15)</i>                                                           |              |                      |                   |
|   | Do you know the attributes of the following technologies? Yes=1 No=0 | _____ <i>If No Skip to the next technology, IF Yes ask for the attributes</i> |              |                      |                   | _____ <i>If No Skip to the next technology, IF Yes ask for the attributes</i> |              |                      |                   |
|   | <i>Technology attributes</i>                                         | <i>Better</i>                                                                 | <i>Worse</i> | <i>No difference</i> | <i>Don't know</i> | <i>Better</i>                                                                 | <i>Worse</i> | <i>No difference</i> | <i>Don't know</i> |
| 1 | Early maturity                                                       |                                                                               |              |                      |                   |                                                                               |              |                      |                   |
| 2 | Yield                                                                |                                                                               |              |                      |                   |                                                                               |              |                      |                   |
| 3 | Pest and disease resistance                                          |                                                                               |              |                      |                   |                                                                               |              |                      |                   |
| 4 | Marketability (demand)                                               |                                                                               |              |                      |                   |                                                                               |              |                      |                   |
| 5 | Cost of planting materials                                           |                                                                               |              |                      |                   |                                                                               |              |                      |                   |
| 6 | Market price received                                                |                                                                               |              |                      |                   |                                                                               |              |                      |                   |
| 7 | Cost of day old chicks                                               |                                                                               |              |                      |                   |                                                                               |              |                      |                   |
| 8 | Taste                                                                |                                                                               |              |                      |                   |                                                                               |              |                      |                   |
| 9 | Lays more eggs                                                       |                                                                               |              |                      |                   |                                                                               |              |                      |                   |

7.8 How easily can you market your Kuroiler chicken? *(Circle the applicable)*

1. Very easy 2. Easy 3. Difficult 4. Very difficult 88. DNK

7.9 How easily can you market your Kuroiler eggs? *(Circle the applicable)*

1. Very easy 2. Easy 3. Difficult 4. Very difficult 88. DNK

7.10 What is the **MAIN REASON** for your answer in 7.8 above *(Circle the applicable)*

1. Early maturity 2. Pest and disease resistance 3. Marketability 4. Market price received 5. Cost of day old chicks 6. Taste 7. Lay more eggs 77. Others (specify) -99 N/A

7.11 What is the **MAIN REASON** for your answer in 7.9 above *(Circle the applicable)*

1. Taste 2. Price 3. Size 4. Colour of the yolk -99 N/A

**MODULE8: LIVESTOCK PRODUCTION AND MARKETING**

8.1 For the last **12 months (1st Oct 2015 and 30th Sep 2016)**, please give details of revenue and cost of livestock production?

(Please include all animals on the farm last year also those that were later sold or died) If no livestock is owned skip to next module)

|                | 1                                                                                  | 2a                     | 2b    | 3a    | 3b    | 4a                   | 4b   | 5a                              | 5b                                                       | 6                | 7     | 8   | 9 | 10                | 11                       | 12                                    | 13                                                                            |
|----------------|------------------------------------------------------------------------------------|------------------------|-------|-------|-------|----------------------|------|---------------------------------|----------------------------------------------------------|------------------|-------|-----|---|-------------------|--------------------------|---------------------------------------|-------------------------------------------------------------------------------|
| Animal species | Stock at the beginning of the period (01.Oct.2015)<br><br>(If 0, skip to the next) | Changes over the years |       |       |       |                      |      | Stock at the end of 30.Sep.2016 | Cash expenditures between 10/15 and 9/16<br>Value in Ksh |                  |       |     |   | Who decides sale? | Who decides revenue use? | Who decides technology use e.g. breed | Who mostly decides how much of the total output is consumed by the household? |
|                |                                                                                    | Home consumption       |       | Sales |       | Veterinary treatment | Feed |                                 | Hired labor                                              | Others, specify: |       |     |   |                   |                          |                                       |                                                                               |
|                | Unit                                                                               | Ksh                    | Units | Ksh   | Units |                      |      | Ksh                             |                                                          |                  | Units | Ksh |   |                   |                          |                                       | B                                                                             |
| 1              | Dairy cows/calves                                                                  |                        |       |       |       |                      |      |                                 |                                                          |                  |       |     |   |                   |                          |                                       |                                                                               |
| 2              | Cow/calves                                                                         |                        |       |       |       |                      |      |                                 |                                                          |                  |       |     |   |                   |                          |                                       |                                                                               |
| 3              | Goat                                                                               |                        |       |       |       |                      |      |                                 |                                                          |                  |       |     |   |                   |                          |                                       |                                                                               |
| 4              | Sheep                                                                              |                        |       |       |       |                      |      |                                 |                                                          |                  |       |     |   |                   |                          |                                       |                                                                               |
| 5              | Kuroiler/chicks                                                                    |                        |       |       |       |                      |      |                                 |                                                          |                  |       |     |   |                   |                          |                                       |                                                                               |
| 6              | Other chicken/chicks                                                               |                        |       |       |       |                      |      |                                 |                                                          |                  |       |     |   |                   |                          |                                       |                                                                               |
| 7              | Donkeys                                                                            |                        |       |       |       |                      |      |                                 |                                                          |                  |       |     |   |                   |                          |                                       |                                                                               |
| 8              | Pigs                                                                               |                        |       |       |       |                      |      |                                 |                                                          |                  |       |     |   |                   |                          |                                       |                                                                               |
| 9              | Rabbits                                                                            |                        |       |       |       |                      |      |                                 |                                                          |                  |       |     |   |                   |                          |                                       |                                                                               |
| 10             | Ducks                                                                              |                        |       |       |       |                      |      |                                 |                                                          |                  |       |     |   |                   |                          |                                       |                                                                               |
| 77             |                                                                                    |                        |       |       |       |                      |      |                                 |                                                          |                  |       |     |   |                   |                          |                                       |                                                                               |
| 78             |                                                                                    |                        |       |       |       |                      |      |                                 |                                                          |                  |       |     |   |                   |                          |                                       |                                                                               |

8.2 For the last **12 months (01. Oct 2015 to 30. Sep 2016)**, please give details of production and revenue of the following livestock products?

| Animal product/services | 2                    |           | 3             |           | 4                 |           | 8              |           | 5              | 6                 | 7                        |
|-------------------------|----------------------|-----------|---------------|-----------|-------------------|-----------|----------------|-----------|----------------|-------------------|--------------------------|
|                         | Quantity produced    |           | Quantity sold |           | Quantity Consumed |           | Other, specify |           | Price per unit | Who decides sale? | Who decides revenue use? |
|                         | Qty                  | Unit<br>A | Qty           | Unit<br>A | Qty               | Unit<br>A | Qty            | Unit<br>A |                |                   |                          |
| 1                       | Milk                 |           |               |           |                   |           |                |           |                |                   |                          |
| 6                       | Kuroiler Eggs        |           |               |           |                   |           |                |           |                |                   |                          |
| 2                       | Other Eggs           |           |               |           |                   |           |                |           |                |                   |                          |
| 7                       | Kuroiler Manure      |           |               |           |                   |           |                |           |                |                   |                          |
| 3                       | Manure               |           |               |           |                   |           |                |           |                |                   |                          |
| 4                       | Honey                |           |               |           |                   |           |                |           |                |                   |                          |
| 5                       | Hide                 |           |               |           |                   |           |                |           |                |                   |                          |
| 77                      | Others specify _____ |           |               |           |                   |           |                |           |                |                   |                          |

**Code A:** 1=Kilogram, 2=Litre, 3=90 Kg bag, 4=50 Kg bag, 5=25 Kg bag, 6=Gorogoro, 7=Debe, 8=Wheelbarrow, 9=Ox-cart, 10=Bunch (bananas), 11=Piece/number, 50=Tray, 77=Other (specify) \_\_\_\_\_

**Code B:** 1=Male household head, 2= Female household head, 3=Female spouse, 4=Joint decision, 77= Others (specify) \_\_\_\_\_

**MODULE 9: HOUSEHOLD ASSETS** (*Prompt for each item as listed below*)

**9.1** As at **September 2016**, how many of the following items did the household own that are in **usable/repairable** condition?

To estimate the value ask the respondent how much they would be willing to buy the item in its current state if it were being sold to them

|           | ASSET               | Total Quantity | Estimate total current value of the asset(s) if you were to buy it in its current state |           | ASSET                  | Total Quantity | Estimate total current value of the asset(s) if you were to buy it in its current state |
|-----------|---------------------|----------------|-----------------------------------------------------------------------------------------|-----------|------------------------|----------------|-----------------------------------------------------------------------------------------|
| <b>1</b>  | Tractor             |                |                                                                                         | <b>2</b>  | Slasher                |                |                                                                                         |
| <b>3</b>  | Car/Van             |                |                                                                                         | <b>4</b>  | Axe                    |                |                                                                                         |
| <b>5</b>  | Pickup              |                |                                                                                         | <b>6</b>  | Panga                  |                |                                                                                         |
| <b>7</b>  | Motorcycle          |                |                                                                                         | <b>8</b>  | Hoes/Jembes            |                |                                                                                         |
| <b>9</b>  | Bicycle             |                |                                                                                         | <b>10</b> | Spades/shovel          |                |                                                                                         |
| <b>11</b> | Television          |                |                                                                                         | <b>12</b> | Chemical spray pump    |                |                                                                                         |
| <b>13</b> | Radio               |                |                                                                                         | <b>14</b> | Treadle pump           |                |                                                                                         |
| <b>15</b> | Mobile Phone        |                |                                                                                         | <b>16</b> | Powered water pump     |                |                                                                                         |
| <b>17</b> | Refrigerator        |                |                                                                                         | <b>18</b> | Mosquito net           |                |                                                                                         |
| <b>19</b> | Solar panels        |                |                                                                                         | <b>20</b> | Greenhouse             |                |                                                                                         |
| <b>21</b> | Generator           |                |                                                                                         | <b>22</b> | Water tank             |                |                                                                                         |
| <b>23</b> | Chaff cutter        |                |                                                                                         | <b>24</b> | Store for farm produce |                |                                                                                         |
| <b>25</b> | Ploughs for tractor |                |                                                                                         | <b>26</b> | Lanterns               |                |                                                                                         |
| <b>27</b> | Reaper              |                |                                                                                         | <b>28</b> | Main house             |                |                                                                                         |
| <b>29</b> | Ox-plough           |                |                                                                                         | <b>30</b> | Wheelbarrow            |                |                                                                                         |
| <b>31</b> | Cart                |                |                                                                                         | <b>32</b> | Computer/laptop        |                |                                                                                         |
| <b>33</b> | Livestock Kraal     |                |                                                                                         | <b>34</b> | Biogas digesters       |                |                                                                                         |
| <b>35</b> | Other(specify_____) |                |                                                                                         | <b>36</b> | Other(specify_____)    |                |                                                                                         |
| <b>37</b> |                     |                |                                                                                         | <b>38</b> |                        |                |                                                                                         |

**MODULE 11: OTHER SOURCES OF INCOME AND TRANSFER**

11.1 Do you have off farm employment? \_\_\_\_\_ (1=Yes; 0=No) If NO, skip to 11.2.

| <i>Please prompt the codes to make sure nothing is forgotten</i> |                         |                                                         |                                                          |                  |    |
|------------------------------------------------------------------|-------------------------|---------------------------------------------------------|----------------------------------------------------------|------------------|----|
| 1                                                                | 2                       | 3                                                       | 4                                                        | 5a               | 5b |
| MEMID                                                            | Type of Occupation<br>A | Average Number of days<br>worked per month 10/15 – 9/16 | Average Number of months<br>worked per year 10/15 – 9/16 | Earning per unit |    |
|                                                                  |                         |                                                         |                                                          | Ksh              | B  |
|                                                                  |                         |                                                         |                                                          |                  |    |
|                                                                  |                         |                                                         |                                                          |                  |    |
|                                                                  |                         |                                                         |                                                          |                  |    |
|                                                                  |                         |                                                         |                                                          |                  |    |
|                                                                  |                         |                                                         |                                                          |                  |    |
|                                                                  |                         |                                                         |                                                          |                  |    |

**Code A:** 1= Agricultural labour (casual+permanent), 2= Casual labour (non-agricultural), 3= Salary (Permanent non-agricultural employment)**Code B:** 1= Day, 2= Month, 3= Year, 4= Lump sum, payment, 77= Other, specify: \_\_\_\_\_

11.2 Do you have any other sources of income? \_\_\_\_\_ (1=Yes; 0=No) If NO, please probe and skip to 12.

| <i>Please prompt the codes to make sure nothing is forgotten</i> |                                      |                    |                                                                                                         |  |
|------------------------------------------------------------------|--------------------------------------|--------------------|---------------------------------------------------------------------------------------------------------|--|
| 1                                                                | 2                                    | 3                  | 4                                                                                                       |  |
| Categories                                                       | Code                                 | Type of occupation | Amount /value received between Oct15/<br>Sept 16/ for small businesses ask for<br>profit (+) losses (-) |  |
| 1                                                                | Remittances/gifts/transfers/food aid | 1                  |                                                                                                         |  |
| 2                                                                | Pension                              | 2                  |                                                                                                         |  |
| 3                                                                | Small business                       | 1                  | Brick making                                                                                            |  |
|                                                                  |                                      | 2                  | Carpentry                                                                                               |  |
|                                                                  |                                      | 3                  | Construction                                                                                            |  |
|                                                                  |                                      | 4                  | Grain mill                                                                                              |  |
|                                                                  |                                      | 5                  | Handicrafts                                                                                             |  |
|                                                                  |                                      | 6                  | Beverage, local brew                                                                                    |  |
|                                                                  |                                      | 7                  | Sales in shop, petty trade                                                                              |  |
|                                                                  |                                      | 8                  | Transport                                                                                               |  |
|                                                                  |                                      | 77                 | Other, specify _____                                                                                    |  |
| 4                                                                | Sales of forest products             | 9                  | Sale of wood and charcoal                                                                               |  |
|                                                                  |                                      | 10                 | Sale of wild nuts/fruits                                                                                |  |
| 5                                                                | Other agric. Income                  | 11                 | Sale of crop residues                                                                                   |  |
|                                                                  |                                      | 12                 | Leasing out land                                                                                        |  |
|                                                                  |                                      | 13                 | Renting out oxen for ploughing                                                                          |  |
|                                                                  |                                      | 14                 | Hiring out machinery services to other farmers                                                          |  |
|                                                                  |                                      | 15                 | Dividends (T-bills, bonds, shares)                                                                      |  |
|                                                                  |                                      | 16                 | Tea bonus                                                                                               |  |
| 6                                                                | Other                                | 35                 | Betting                                                                                                 |  |

**MODULE 12: NON-FOOD EXPENDITURE**

Consider the **last year (Oct 15 - Sept 16)** generally how much has your HH spent on the items listed in a typical year (see specification indicated for each item)?

|                                       |    | 1                                                                   | 2                                                                                                    |
|---------------------------------------|----|---------------------------------------------------------------------|------------------------------------------------------------------------------------------------------|
|                                       |    | <i>Read out: Please exclude <b>Business Expenditures</b></i>        | How much did your household spend on [ITEM/SERVICE] during the <b>last year</b> (Oct. 15 – Sept 16)? |
|                                       |    | <i>Enter 88, if respondent does not know.</i>                       | Value in Khs                                                                                         |
| <b>Non-food</b>                       | 1  | Rent (housing)                                                      |                                                                                                      |
|                                       | 2  | Personal care supplies                                              |                                                                                                      |
|                                       | 3  | Clothes, shoes and bags, accessories                                |                                                                                                      |
|                                       | 4  | Detergent/washing powder                                            |                                                                                                      |
|                                       | 5  | Electricity                                                         |                                                                                                      |
|                                       | 6  | Other non-food                                                      |                                                                                                      |
| <b>Transportation + communication</b> | 7  | Fuel, maintenance, insurance, and tax for motorbike/car             |                                                                                                      |
|                                       | 8  | Public transport                                                    |                                                                                                      |
|                                       | 9  | Airtime (incl. MPESA)                                               |                                                                                                      |
|                                       | 10 | Other transportation, communication                                 |                                                                                                      |
|                                       | 11 |                                                                     |                                                                                                      |
|                                       | 12 |                                                                     |                                                                                                      |
| <b>Education</b>                      | 13 | School fees, books, Student’s dress/uniform, Tuition and rental fee |                                                                                                      |
|                                       | 14 | Other cost of schooling                                             |                                                                                                      |
|                                       | 15 |                                                                     |                                                                                                      |
|                                       | 16 |                                                                     |                                                                                                      |
| <b>Health</b>                         | 17 | Medicine, doctor fees                                               |                                                                                                      |
|                                       | 18 | Other health cost                                                   |                                                                                                      |
|                                       | 19 |                                                                     |                                                                                                      |
|                                       | 20 |                                                                     |                                                                                                      |
| <b>Social</b>                         | 21 | Celebration and funeral cost                                        |                                                                                                      |
|                                       | 22 | Recreation and entertainment                                        |                                                                                                      |
|                                       | 23 | Contributions (eg. Church, groups)                                  |                                                                                                      |
|                                       | 24 | Tobacco (incl. snuff and miraa)                                     |                                                                                                      |
|                                       | 25 | Insurance (eg. Car, life, health)                                   |                                                                                                      |
|                                       | 26 | Remittances transferred to other HH                                 |                                                                                                      |
|                                       | 27 | Other social cost                                                   |                                                                                                      |
|                                       | 28 |                                                                     |                                                                                                      |
|                                       | 29 |                                                                     |                                                                                                      |

**MODULE 13: INFORMATION ON CREDIT ACCESS**

13.1 Could you obtain credit if you needed it for the purpose of operational agricultural expenses (e.g. buying fertilizer paying for labour etc.)? \_\_\_\_\_ *1=Yes, 0=No*

13.2 During the last **12 months (Oct15 to Sep16)**, have you or any other household member received any credit to buy inputs, or received inputs on credit? \_\_\_\_\_ *1=Yes, 0=No*

13.3 If yes to 13.2, how much did you receive in Ksh? (\_\_\_\_\_)  
*(Include the value of inputs if inputs are provided on credit)*

13.4 How much went into purchasing inputs? (\_\_\_\_\_)  
*(Include the value of inputs if inputs are provided on credit)*

**MODULE 15: ACCESS TO SOCIOECONOMIC INFRASTRUCTURE**

| 1                                   | 2                                   | 3                                                                                                 |
|-------------------------------------|-------------------------------------|---------------------------------------------------------------------------------------------------|
| <b>Social facilities</b>            | <b>Distance to the nearest (km)</b> | <b>Most frequently used means of transportation to the facility</b><br><i>(Use codes A below)</i> |
| 1. Murram road                      |                                     |                                                                                                   |
| 2. Tarmac road                      |                                     |                                                                                                   |
| 3. Village market                   |                                     |                                                                                                   |
| 4. Main Agricultural input market   |                                     |                                                                                                   |
| 5. Main agricultural product market |                                     |                                                                                                   |
| 6. Health centre                    |                                     |                                                                                                   |
| 7. Agric. Extension agent           |                                     |                                                                                                   |

**Code A: Means of transport Codes**

1= Bicycle; 2= Motorbike; 3= Car; 4= Walk;  
77= Others, (specify) \_\_\_\_\_



**MODULE 17: SHOCKS EXPERIENCED BY THE HOUSEHOLD**

|    | <b>1</b>                                                 | <b>2</b>                                                                                                              | <b>3</b>                                | <b>4</b>                                                                                           |
|----|----------------------------------------------------------|-----------------------------------------------------------------------------------------------------------------------|-----------------------------------------|----------------------------------------------------------------------------------------------------|
|    | <b>Please answer the following questions accordingly</b> | Did you experience [NAME OF SHOCK] in the last 12 month?<br><i>1=Yes, 0=No</i><br><i>If No Skip to the next shock</i> | If yes, how many times has it occurred? | What was the intensity of the last shock to this household?<br>1= Severe<br>2= Moderate<br>3= Mild |
|    | <b>Climatic shocks</b>                                   |                                                                                                                       |                                         |                                                                                                    |
| 1  | Drought                                                  |                                                                                                                       |                                         |                                                                                                    |
| 2  | Floods                                                   |                                                                                                                       |                                         |                                                                                                    |
| 3  | Frosts                                                   |                                                                                                                       |                                         |                                                                                                    |
| 4  | Hailstorm                                                |                                                                                                                       |                                         |                                                                                                    |
|    | <b>Biological shocks</b>                                 |                                                                                                                       |                                         |                                                                                                    |
| 5  | Pests or diseases that affected crops before harvest     |                                                                                                                       |                                         |                                                                                                    |
| 6  | Pests or diseases that led to storage losses             |                                                                                                                       |                                         |                                                                                                    |
| 14 | Loss of livestock                                        |                                                                                                                       |                                         |                                                                                                    |
|    | <b>Economic shocks</b>                                   |                                                                                                                       |                                         |                                                                                                    |
| 7  | Large increase in agricultural input prices              |                                                                                                                       |                                         |                                                                                                    |
| 8  | Large decrease in agricultural output prices             |                                                                                                                       |                                         |                                                                                                    |
| 9  | Large increase in food prices                            |                                                                                                                       |                                         |                                                                                                    |
|    | <b>Other shocks</b>                                      |                                                                                                                       |                                         |                                                                                                    |
| 10 | Loss of family member                                    |                                                                                                                       |                                         |                                                                                                    |
| 11 | Job loss                                                 |                                                                                                                       |                                         |                                                                                                    |
| 12 | Acute illness                                            |                                                                                                                       |                                         |                                                                                                    |
| 77 | Other, specify _____                                     |                                                                                                                       |                                         |                                                                                                    |

**TARGET PERSON: GROUP MEMBER**

**Respondent MEMID:** \_\_\_\_\_

**MODULE 18: SOCIAL CAPITAL ENDOWMENT**

| 18.1 List all the groups you belong to (Start with the sampled group) |            |                                               |             |                                                                  |                            |                                                                                                          |                                                                        |
|-----------------------------------------------------------------------|------------|-----------------------------------------------|-------------|------------------------------------------------------------------|----------------------------|----------------------------------------------------------------------------------------------------------|------------------------------------------------------------------------|
| 1                                                                     | 2          | 3                                             | 4           | 8                                                                | 9                          | 10                                                                                                       | 11                                                                     |
| Group Name                                                            | Group Type | Please name the most important group function | Year joined | Participation in meetings in the reference period (Oct 15/Sep16) | Your own role in the group | Did the group receive any agricultural training during the reference period (Oct15/Sept16) Yes= 1; N0= 0 | Who offered the training?<br><br>AH= 1; Other= 0, AH+other= 2, DNK= 88 |
|                                                                       | A          | B                                             |             | D                                                                | E                          |                                                                                                          |                                                                        |
|                                                                       |            |                                               |             |                                                                  |                            |                                                                                                          |                                                                        |
|                                                                       |            |                                               |             |                                                                  |                            |                                                                                                          |                                                                        |
|                                                                       |            |                                               |             |                                                                  |                            |                                                                                                          |                                                                        |
|                                                                       |            |                                               |             |                                                                  |                            |                                                                                                          |                                                                        |
|                                                                       |            |                                               |             |                                                                  |                            |                                                                                                          |                                                                        |
|                                                                       |            |                                               |             |                                                                  |                            |                                                                                                          |                                                                        |
|                                                                       |            |                                               |             |                                                                  |                            |                                                                                                          |                                                                        |
|                                                                       |            |                                               |             |                                                                  |                            |                                                                                                          |                                                                        |

*In case sampled group was not named in table above, answer 18.9, 18.10 and 18.11, otherwise skip to 18.2.*

18.9 Are you still a member of the sampled group (NAME)? \_\_\_\_\_ (Yes= 1; No= 0)

18.10 If no: Please shortly explain why you left the group: \_\_\_\_\_

18.11 In case, you received agricultural training from Africa Harvest in the sampled group: Who mostly informed you about the single training session (time and place)? \_\_\_\_\_ (1= Group leader, 2= Other members, 3= Extension officer, 4= He was not informed, 77= Other, specify: \_\_\_\_\_, -99= N/A)

18.2. Do you personally exchange information with the local authorities/gov't agencies? \_\_\_\_\_ (1= Yes; 0= No)

18.6 Do you hold any of the other following positions: \_\_\_\_\_ (Multiple answers possible)  
(0=No, 1= Village chief, 2= Village elder, 3= Nyumbakumi, 4= Religious leader, 77= Other \_\_\_\_\_)

18.7 Are you a close relative to one of the mentioned positions (1=Yes; 0=No) \_\_\_\_\_

18.8 If yes: Name position and relative: a. Position: \_\_\_\_\_ (Code 18.6) Relative \_\_\_\_\_ F  
b. Position: \_\_\_\_\_ (Code 18.6) Relative \_\_\_\_\_ F

**Codes A**

- 1. Farmer cooperative
- 2. Farmers group
- 3. Women`s association
- 4. Youth association
- 5. Faith-based association/group
- 6. Funeral association/insurance group
- 7. Savings and credit group
- 8. Community based organization
- 9. Water users association
- 10. Informal labour sharing group
- 11. Widow/ widower
- 12. Family group
- 77. Other (\_\_\_\_\_)

**Codes B**

- 1. Produce marketing
- 2. Input access or marketing
- 3. Seed production
- 4. Farmer research
- 5. Savings and credit
- 6. Welfare/funeral activities
- 7. Tree planting/Nursery
- 8. Soil & Water conservation
- 9. Faith-based organization
- 10. Input credit
- 77. Other (\_\_\_\_\_)

**Codes D**

- 1. Always
- 2. Sometimes
- 3. Rarely
- 4. Never

**Codes E**

- 1. Official
- 2. Ex-official
- 3. Ordinary member

**Code F**

- 1. Parent
- 2. Spouse
- 3. Child
- 4. Brother/sister
- 5. Grandparent
- 6. Grandchild
- 7. Nephew/Nice
- 8. Uncle/Aunt
- 9. Cousin
- 10. Mother/father in law
- 11. Brother/Sister-in law
- 12. Other relative
- 13. Neighbour
- 14. Friend
- 15. Fellow villager
- 16. Attend same church/mosque
- 17. Business colleague
- 77. Other, specify \_\_\_\_\_

18.12 Please cross the correct answer:

1= Disagree strongly, 2= Disagree a little, 3= Neither agree nor disagree, 4= Agree a little, 5= Agree strongly, 6= Don't know

| I see myself as someone who ... |                                                                                          | 1 | 2 | 3 | 4 | 5 | 6 |
|---------------------------------|------------------------------------------------------------------------------------------|---|---|---|---|---|---|
| 1                               | ... finds it important to help the people nearby, to care for their wellbeing            |   |   |   |   |   |   |
| 2                               | ...Is reserved                                                                           |   |   |   |   |   |   |
| 3                               | ...is generally trusting                                                                 |   |   |   |   |   |   |
| 4                               | ... finds it important to think up new ideas and be creative, to do things on my own way |   |   |   |   |   |   |
| 5                               | ... who's happiness depends on people around myself                                      |   |   |   |   |   |   |
| 6                               | ...is outgoing/social                                                                    |   |   |   |   |   |   |
| 7                               | ...tends to find fault with others                                                       |   |   |   |   |   |   |
| 8                               | ... finds it important to maintain harmony within ones group                             |   |   |   |   |   |   |
| 9                               | ... would always sacrifices one's self interest for the group                            |   |   |   |   |   |   |
| 10                              | ... would stay in a group if they needed me, even if I were not happy with the group     |   |   |   |   |   |   |

**MODULE 14: COMMUNITY OUTREACH METHODS**

14.1 How many visits or contacts with extension agents did you have during the last one year (Oct/2015 to Sep/2016)

1= Government extension \_\_\_\_\_ 2=NGO \_\_\_\_\_ 3=Private \_\_\_\_\_

**If NO/ZERO to all in 14.1, skip to 14.7**

14.2 State the **most important** type of agricultural information that you sought/received from the extension agent in the period between Oct 2015 and Sep 2016 (*use codes B below*)

1= Government extension \_\_\_\_\_ 2=NGO \_\_\_\_\_ 3=Private \_\_\_\_\_

**Code B**

- |                                   |                                           |
|-----------------------------------|-------------------------------------------|
| 1. New crop varieties/breeds      | 10. Safe use of pesticides                |
| 2. Agric. credit/insurance        | 11. Adaptation to climate change          |
| 3. Field pest and disease control | 12. Postharvest handling                  |
| 4. Input quality                  | 13. Collective action/farmer organization |
| 5. Input availability             | 14. Livestock production                  |
| 6. Input markets and prices       | 15. Tree planting                         |
| 7. Output markets and prices      | 77. Other.....                            |
| 8. Soil and water management      | 78. Other.....                            |
| 9. Crop rotation/ Minimum tillage |                                           |

14.3 In general, how would you rate your satisfaction with the information that you received? (*Use codes C below*)

1= Government extension \_\_\_\_\_ 2=NGO \_\_\_\_\_ 3=Private \_\_\_\_\_

**Code C**

1=Very unsatisfied                      2 =Unsatisfied                      3=Satisfied                      4=Very satisfied

**14.7 Characteristics of the extension officers**

**Section 14.7 is applicable only if the respondent received training from Africa Harvest (see section 18.1 question 11 above)**

14.8 I would like to know the gender of the officer who conducted trainings in your group \_\_\_\_\_ 1=Male, 0=Female

14.9 What training did you attend? (Please circle all applicable) [1] Agriculture [2] Nutrition [3] Marketing [99] None

**If NONE, please skip to 19.**

14.10 What training session did you find **most important**? (Please circle one)

[1] KK 15 husbandry [2] Kuroiler husbandry [3] KK 15 post harvest management [4] Kuroiler health management [5] KK 15 marketing

[6] Kuroiler marketing [7] Malnutrition [8] Balanced diet [9] Food Safety

14.11 Could you please rate the officer with regard to:

|                             |    | 1                                                         | 2                                                                                           |
|-----------------------------|----|-----------------------------------------------------------|---------------------------------------------------------------------------------------------|
|                             |    | Aspect                                                    | Could you please rate the officer with regard to:<br>(1= Poor, 2=Fair, 3=Good, 4=Excellent) |
| <b>Human Relations</b>      | 1  | Integration with farmers                                  |                                                                                             |
|                             | 2  | Influence in adopting the technologies                    |                                                                                             |
|                             | 3  | Display of understanding of farmers situations            |                                                                                             |
|                             | 4  | Keeping promises                                          |                                                                                             |
| <b>Communication skills</b> | 5  | Clarity of concepts                                       |                                                                                             |
|                             | 6  | Detailed in delivering their message                      |                                                                                             |
|                             | 7  | Encouragement of exchange of experiences during training  |                                                                                             |
|                             | 8  | Use of feedback systems                                   |                                                                                             |
|                             | 9  | Provision of follow-up sessions                           |                                                                                             |
|                             | 10 | Encouragement of questions and enquires                   |                                                                                             |
|                             | 11 | Good listening skills                                     |                                                                                             |
|                             | 12 | Provision of relevant response to questions               |                                                                                             |
| <b>Role performance</b>     | 13 | Use of communication aids e.g. flip charts                |                                                                                             |
|                             | 14 | Use of appropriate languages to enhance understanding     |                                                                                             |
|                             | 15 | Frequency of farm visit                                   |                                                                                             |
|                             | 16 | Availability to farmers                                   |                                                                                             |
|                             | 17 | Knowledge of nutrition enhancing technologies             |                                                                                             |
|                             | 18 | Knowledge of good farming practises                       |                                                                                             |
|                             | 19 | Encouragement of farmers to share information with others |                                                                                             |
|                             | 20 | Time management                                           |                                                                                             |

Questionnaire number (adda\_hhid) \_\_\_\_\_

**MODULE 19: SOCIAL NETWORKS****Code A**

|           |                      |           |                           |
|-----------|----------------------|-----------|---------------------------|
| <b>1</b>  | Parent               | <b>11</b> | Brother/Sister-in law     |
| <b>2</b>  | Spouse               | <b>12</b> | Other relative            |
| <b>3</b>  | Child                | <b>13</b> | Neighbour                 |
| <b>4</b>  | Brother/sister       | <b>14</b> | Friend                    |
| <b>5</b>  | Grandparent          | <b>15</b> | Fellow villager           |
| <b>6</b>  | Grandchild           | <b>16</b> | Attend same church/mosque |
| <b>7</b>  | Nephew/Nice          | <b>17</b> | Business colleague        |
| <b>8</b>  | Uncle/Aunt           | <b>77</b> | Other, specify____        |
| <b>9</b>  | Cousin               |           |                           |
| <b>10</b> | Mother/father in law |           |                           |

| 19.1. General information about each group member |                          |                                               |                                                   |                                                  |                                                            |                                                                |                                                                                                                                                   |                |                                                          |
|---------------------------------------------------|--------------------------|-----------------------------------------------|---------------------------------------------------|--------------------------------------------------|------------------------------------------------------------|----------------------------------------------------------------|---------------------------------------------------------------------------------------------------------------------------------------------------|----------------|----------------------------------------------------------|
| 1                                                 | 2                        | 3                                             | 4                                                 | 5                                                | 6                                                          | 7                                                              | 8                                                                                                                                                 | 9              | 32                                                       |
| MEM ID                                            | Name of the group member | Do you know NAME?<br>(1=Yes; 0=No), (-99=N/A) | Please specify your relationship to NAME<br><br>A | Is NAME's plot bordering yours?<br>(1=Yes; 0=No) | Do you know the kind of crops NAME grows?<br>(1=Yes; 0=No) | Do you know the kind of livestock NAME keeps?<br>(1=Yes; 0=No) | Did you lend or borrow any of the following production means from NAME between Oct15 and Sept16?<br>0=no<br>1=lend<br>2=borrow<br>3=lend & borrow |                | Do you exchange / share food items?<br><br>(1=Yes; 0=No) |
|                                                   |                          |                                               |                                                   |                                                  |                                                            |                                                                | Seeds                                                                                                                                             | Agric. Produce |                                                          |
|                                                   |                          | 1                                             |                                                   |                                                  |                                                            |                                                                |                                                                                                                                                   |                |                                                          |
|                                                   |                          | 2                                             |                                                   |                                                  |                                                            |                                                                |                                                                                                                                                   |                |                                                          |
|                                                   |                          | 3                                             |                                                   |                                                  |                                                            |                                                                |                                                                                                                                                   |                |                                                          |
|                                                   |                          | 4                                             |                                                   |                                                  |                                                            |                                                                |                                                                                                                                                   |                |                                                          |
|                                                   |                          | 5                                             |                                                   |                                                  |                                                            |                                                                |                                                                                                                                                   |                |                                                          |
|                                                   |                          | 6                                             |                                                   |                                                  |                                                            |                                                                |                                                                                                                                                   |                |                                                          |
|                                                   |                          | 7                                             |                                                   |                                                  |                                                            |                                                                |                                                                                                                                                   |                |                                                          |
|                                                   |                          | 8                                             |                                                   |                                                  |                                                            |                                                                |                                                                                                                                                   |                |                                                          |
|                                                   |                          | 9                                             |                                                   |                                                  |                                                            |                                                                |                                                                                                                                                   |                |                                                          |
|                                                   |                          | 10                                            |                                                   |                                                  |                                                            |                                                                |                                                                                                                                                   |                |                                                          |
|                                                   |                          | 11                                            |                                                   |                                                  |                                                            |                                                                |                                                                                                                                                   |                |                                                          |
|                                                   |                          | 12                                            |                                                   |                                                  |                                                            |                                                                |                                                                                                                                                   |                |                                                          |
|                                                   |                          | 13                                            |                                                   |                                                  |                                                            |                                                                |                                                                                                                                                   |                |                                                          |
|                                                   |                          | 14                                            |                                                   |                                                  |                                                            |                                                                |                                                                                                                                                   |                |                                                          |
|                                                   |                          | 15                                            |                                                   |                                                  |                                                            |                                                                |                                                                                                                                                   |                |                                                          |
|                                                   |                          | 16                                            |                                                   |                                                  |                                                            |                                                                |                                                                                                                                                   |                |                                                          |
|                                                   |                          | 17                                            |                                                   |                                                  |                                                            |                                                                |                                                                                                                                                   |                |                                                          |
|                                                   |                          | 18                                            |                                                   |                                                  |                                                            |                                                                |                                                                                                                                                   |                |                                                          |
|                                                   |                          | 19                                            |                                                   |                                                  |                                                            |                                                                |                                                                                                                                                   |                |                                                          |
|                                                   |                          | 20                                            |                                                   |                                                  |                                                            |                                                                |                                                                                                                                                   |                |                                                          |
|                                                   |                          | 21                                            |                                                   |                                                  |                                                            |                                                                |                                                                                                                                                   |                |                                                          |
|                                                   |                          | 22                                            |                                                   |                                                  |                                                            |                                                                |                                                                                                                                                   |                |                                                          |
|                                                   |                          | 23                                            |                                                   |                                                  |                                                            |                                                                |                                                                                                                                                   |                |                                                          |
|                                                   |                          | 24                                            |                                                   |                                                  |                                                            |                                                                |                                                                                                                                                   |                |                                                          |
|                                                   |                          | 25                                            |                                                   |                                                  |                                                            |                                                                |                                                                                                                                                   |                |                                                          |
|                                                   |                          | 26                                            |                                                   |                                                  |                                                            |                                                                |                                                                                                                                                   |                |                                                          |
|                                                   |                          | 27                                            |                                                   |                                                  |                                                            |                                                                |                                                                                                                                                   |                |                                                          |
|                                                   |                          | 28                                            |                                                   |                                                  |                                                            |                                                                |                                                                                                                                                   |                |                                                          |
|                                                   |                          | 29                                            |                                                   |                                                  |                                                            |                                                                |                                                                                                                                                   |                |                                                          |
|                                                   |                          | 30                                            |                                                   |                                                  |                                                            |                                                                |                                                                                                                                                   |                |                                                          |
|                                                   |                          | 31                                            |                                                   |                                                  |                                                            |                                                                |                                                                                                                                                   |                |                                                          |
|                                                   |                          | 32                                            |                                                   |                                                  |                                                            |                                                                |                                                                                                                                                   |                |                                                          |
|                                                   |                          | 33                                            |                                                   |                                                  |                                                            |                                                                |                                                                                                                                                   |                |                                                          |
|                                                   |                          | 34                                            |                                                   |                                                  |                                                            |                                                                |                                                                                                                                                   |                |                                                          |
|                                                   |                          | 35                                            |                                                   |                                                  |                                                            |                                                                |                                                                                                                                                   |                |                                                          |
|                                                   |                          | 36                                            |                                                   |                                                  |                                                            |                                                                |                                                                                                                                                   |                |                                                          |
|                                                   |                          | 37                                            |                                                   |                                                  |                                                            |                                                                |                                                                                                                                                   |                |                                                          |
|                                                   |                          | 38                                            |                                                   |                                                  |                                                            |                                                                |                                                                                                                                                   |                |                                                          |
|                                                   |                          | 39                                            |                                                   |                                                  |                                                            |                                                                |                                                                                                                                                   |                |                                                          |
|                                                   |                          | 40                                            |                                                   |                                                  |                                                            |                                                                |                                                                                                                                                   |                |                                                          |

Questionnaire number (adda\_hhid) \_\_\_\_\_



| 19.1. General Information about each group member |                      |                                                                                    |                                                                                                                       |                                                                                                                        |                                                           |                                                                                                          |
|---------------------------------------------------|----------------------|------------------------------------------------------------------------------------|-----------------------------------------------------------------------------------------------------------------------|------------------------------------------------------------------------------------------------------------------------|-----------------------------------------------------------|----------------------------------------------------------------------------------------------------------|
| 1                                                 | 2                    | 10                                                                                 | 11                                                                                                                    | 12                                                                                                                     | 16                                                        | 13                                                                                                       |
| MEM ID                                            | Name of Group Member | If you suddenly needed money, would you ask NAME to lend it to you? (1=Yes; 0=No), | Inside of this group: who are the farmers who would adopt new cropping technologies <b>first</b> ? Please mark with X | Inside of this group: who are the farmers who would adopt new livestock technologies <b>first</b> ? Please mark with X | Have you visited NAME between Oct15/Sep16 ? (1=Yes;0=No ) | Have you talked to NAME between Oct15/Sep16? (1=Yes; 0=No), if no cross name out and skip to next person |
|                                                   |                      | 1                                                                                  |                                                                                                                       |                                                                                                                        |                                                           |                                                                                                          |
|                                                   |                      | 2                                                                                  |                                                                                                                       |                                                                                                                        |                                                           |                                                                                                          |
|                                                   |                      | 3                                                                                  |                                                                                                                       |                                                                                                                        |                                                           |                                                                                                          |
|                                                   |                      | 4                                                                                  |                                                                                                                       |                                                                                                                        |                                                           |                                                                                                          |
|                                                   |                      | 5                                                                                  |                                                                                                                       |                                                                                                                        |                                                           |                                                                                                          |
|                                                   |                      | 6                                                                                  |                                                                                                                       |                                                                                                                        |                                                           |                                                                                                          |
|                                                   |                      | 7                                                                                  |                                                                                                                       |                                                                                                                        |                                                           |                                                                                                          |
|                                                   |                      | 8                                                                                  |                                                                                                                       |                                                                                                                        |                                                           |                                                                                                          |
|                                                   |                      | 9                                                                                  |                                                                                                                       |                                                                                                                        |                                                           |                                                                                                          |
|                                                   |                      | 10                                                                                 |                                                                                                                       |                                                                                                                        |                                                           |                                                                                                          |
|                                                   |                      | 11                                                                                 |                                                                                                                       |                                                                                                                        |                                                           |                                                                                                          |
|                                                   |                      | 12                                                                                 |                                                                                                                       |                                                                                                                        |                                                           |                                                                                                          |
|                                                   |                      | 13                                                                                 |                                                                                                                       |                                                                                                                        |                                                           |                                                                                                          |
|                                                   |                      | 14                                                                                 |                                                                                                                       |                                                                                                                        |                                                           |                                                                                                          |
|                                                   |                      | 15                                                                                 |                                                                                                                       |                                                                                                                        |                                                           |                                                                                                          |
|                                                   |                      | 16                                                                                 |                                                                                                                       |                                                                                                                        |                                                           |                                                                                                          |
|                                                   |                      | 17                                                                                 |                                                                                                                       |                                                                                                                        |                                                           |                                                                                                          |
|                                                   |                      | 18                                                                                 |                                                                                                                       |                                                                                                                        |                                                           |                                                                                                          |
|                                                   |                      | 19                                                                                 |                                                                                                                       |                                                                                                                        |                                                           |                                                                                                          |
|                                                   |                      | 20                                                                                 |                                                                                                                       |                                                                                                                        |                                                           |                                                                                                          |
|                                                   |                      | 21                                                                                 |                                                                                                                       |                                                                                                                        |                                                           |                                                                                                          |
|                                                   |                      | 22                                                                                 |                                                                                                                       |                                                                                                                        |                                                           |                                                                                                          |
|                                                   |                      | 23                                                                                 |                                                                                                                       |                                                                                                                        |                                                           |                                                                                                          |
|                                                   |                      | 24                                                                                 |                                                                                                                       |                                                                                                                        |                                                           |                                                                                                          |
|                                                   |                      | 25                                                                                 |                                                                                                                       |                                                                                                                        |                                                           |                                                                                                          |
|                                                   |                      | 26                                                                                 |                                                                                                                       |                                                                                                                        |                                                           |                                                                                                          |
|                                                   |                      | 27                                                                                 |                                                                                                                       |                                                                                                                        |                                                           |                                                                                                          |
|                                                   |                      | 28                                                                                 |                                                                                                                       |                                                                                                                        |                                                           |                                                                                                          |
|                                                   |                      | 29                                                                                 |                                                                                                                       |                                                                                                                        |                                                           |                                                                                                          |
|                                                   |                      | 30                                                                                 |                                                                                                                       |                                                                                                                        |                                                           |                                                                                                          |
|                                                   |                      | 31                                                                                 |                                                                                                                       |                                                                                                                        |                                                           |                                                                                                          |
|                                                   |                      | 32                                                                                 |                                                                                                                       |                                                                                                                        |                                                           |                                                                                                          |
|                                                   |                      | 33                                                                                 |                                                                                                                       |                                                                                                                        |                                                           |                                                                                                          |
|                                                   |                      | 34                                                                                 |                                                                                                                       |                                                                                                                        |                                                           |                                                                                                          |
|                                                   |                      | 35                                                                                 |                                                                                                                       |                                                                                                                        |                                                           |                                                                                                          |
|                                                   |                      | 36                                                                                 |                                                                                                                       |                                                                                                                        |                                                           |                                                                                                          |
|                                                   |                      | 37                                                                                 |                                                                                                                       |                                                                                                                        |                                                           |                                                                                                          |
|                                                   |                      | 38                                                                                 |                                                                                                                       |                                                                                                                        |                                                           |                                                                                                          |
|                                                   |                      | 39                                                                                 |                                                                                                                       |                                                                                                                        |                                                           |                                                                                                          |
|                                                   |                      | 40                                                                                 |                                                                                                                       |                                                                                                                        |                                                           |                                                                                                          |

Questionnaire number (adda\_hhid) \_\_\_\_\_

**Code A**

- 1 Very often
- 2 Often
- 3 Sometimes
- 4 Rarely

**Code C**

- 1 Preparation of meals
- 2 Choice of products
- 3 Nutritional state of children
- 4 Quantity of food
- 5 Composition of meals
- 6 Content of nutrition training
- 7 Balanced diet
- 77 Other, specify \_\_\_\_\_

| <b>19.1. Specific interaction within the farmer group (remind respondent of nutrition definition)</b> |                          |                                                                       |                                                                                              |                                                                                     |                                                                                                                                 |                                                                           |                                                                        |
|-------------------------------------------------------------------------------------------------------|--------------------------|-----------------------------------------------------------------------|----------------------------------------------------------------------------------------------|-------------------------------------------------------------------------------------|---------------------------------------------------------------------------------------------------------------------------------|---------------------------------------------------------------------------|------------------------------------------------------------------------|
| <b>1</b>                                                                                              | <b>2</b>                 | <b>14</b>                                                             | <b>17</b>                                                                                    | <b>18</b>                                                                           | <b>19</b>                                                                                                                       | <b>23</b>                                                                 | <b>24</b>                                                              |
| MEM ID                                                                                                | Name of the Group Member | How often did you talk with NAME between Oct15/Sep16?<br><br><b>A</b> | Did you share information on nutrition with NAME?<br>(1=Yes;0=No)<br><i>If no skip to 19</i> | Name the specific nutrition topic you mostly talked about with NAME<br><br><b>C</b> | Did you share information on agriculture with NAME between Oct15/Sept16?<br>(1=Yes; 0=No),<br><i>if no, skip to next person</i> | Did you share information on Kuroiler chicken with NAME?<br>(1=Yes; 0=No) | Did you share information on beans (KK 15) with NAME?<br>(1=Yes; 0=No) |
| 1                                                                                                     |                          |                                                                       |                                                                                              |                                                                                     |                                                                                                                                 |                                                                           |                                                                        |
| 2                                                                                                     |                          |                                                                       |                                                                                              |                                                                                     |                                                                                                                                 |                                                                           |                                                                        |
| 3                                                                                                     |                          |                                                                       |                                                                                              |                                                                                     |                                                                                                                                 |                                                                           |                                                                        |
| 4                                                                                                     |                          |                                                                       |                                                                                              |                                                                                     |                                                                                                                                 |                                                                           |                                                                        |
| 5                                                                                                     |                          |                                                                       |                                                                                              |                                                                                     |                                                                                                                                 |                                                                           |                                                                        |
| 6                                                                                                     |                          |                                                                       |                                                                                              |                                                                                     |                                                                                                                                 |                                                                           |                                                                        |
| 7                                                                                                     |                          |                                                                       |                                                                                              |                                                                                     |                                                                                                                                 |                                                                           |                                                                        |
| 8                                                                                                     |                          |                                                                       |                                                                                              |                                                                                     |                                                                                                                                 |                                                                           |                                                                        |
| 9                                                                                                     |                          |                                                                       |                                                                                              |                                                                                     |                                                                                                                                 |                                                                           |                                                                        |
| 10                                                                                                    |                          |                                                                       |                                                                                              |                                                                                     |                                                                                                                                 |                                                                           |                                                                        |
| 11                                                                                                    |                          |                                                                       |                                                                                              |                                                                                     |                                                                                                                                 |                                                                           |                                                                        |
| 12                                                                                                    |                          |                                                                       |                                                                                              |                                                                                     |                                                                                                                                 |                                                                           |                                                                        |
| 13                                                                                                    |                          |                                                                       |                                                                                              |                                                                                     |                                                                                                                                 |                                                                           |                                                                        |
| 14                                                                                                    |                          |                                                                       |                                                                                              |                                                                                     |                                                                                                                                 |                                                                           |                                                                        |
| 15                                                                                                    |                          |                                                                       |                                                                                              |                                                                                     |                                                                                                                                 |                                                                           |                                                                        |
| 16                                                                                                    |                          |                                                                       |                                                                                              |                                                                                     |                                                                                                                                 |                                                                           |                                                                        |
| 17                                                                                                    |                          |                                                                       |                                                                                              |                                                                                     |                                                                                                                                 |                                                                           |                                                                        |
| 18                                                                                                    |                          |                                                                       |                                                                                              |                                                                                     |                                                                                                                                 |                                                                           |                                                                        |
| 19                                                                                                    |                          |                                                                       |                                                                                              |                                                                                     |                                                                                                                                 |                                                                           |                                                                        |
| 20                                                                                                    |                          |                                                                       |                                                                                              |                                                                                     |                                                                                                                                 |                                                                           |                                                                        |
| 21                                                                                                    |                          |                                                                       |                                                                                              |                                                                                     |                                                                                                                                 |                                                                           |                                                                        |
| 22                                                                                                    |                          |                                                                       |                                                                                              |                                                                                     |                                                                                                                                 |                                                                           |                                                                        |
| 23                                                                                                    |                          |                                                                       |                                                                                              |                                                                                     |                                                                                                                                 |                                                                           |                                                                        |
| 24                                                                                                    |                          |                                                                       |                                                                                              |                                                                                     |                                                                                                                                 |                                                                           |                                                                        |
| 25                                                                                                    |                          |                                                                       |                                                                                              |                                                                                     |                                                                                                                                 |                                                                           |                                                                        |
| 26                                                                                                    |                          |                                                                       |                                                                                              |                                                                                     |                                                                                                                                 |                                                                           |                                                                        |
| 27                                                                                                    |                          |                                                                       |                                                                                              |                                                                                     |                                                                                                                                 |                                                                           |                                                                        |
| 28                                                                                                    |                          |                                                                       |                                                                                              |                                                                                     |                                                                                                                                 |                                                                           |                                                                        |
| 29                                                                                                    |                          |                                                                       |                                                                                              |                                                                                     |                                                                                                                                 |                                                                           |                                                                        |
| 30                                                                                                    |                          |                                                                       |                                                                                              |                                                                                     |                                                                                                                                 |                                                                           |                                                                        |
| 31                                                                                                    |                          |                                                                       |                                                                                              |                                                                                     |                                                                                                                                 |                                                                           |                                                                        |
| 32                                                                                                    |                          |                                                                       |                                                                                              |                                                                                     |                                                                                                                                 |                                                                           |                                                                        |
| 33                                                                                                    |                          |                                                                       |                                                                                              |                                                                                     |                                                                                                                                 |                                                                           |                                                                        |
| 34                                                                                                    |                          |                                                                       |                                                                                              |                                                                                     |                                                                                                                                 |                                                                           |                                                                        |
| 35                                                                                                    |                          |                                                                       |                                                                                              |                                                                                     |                                                                                                                                 |                                                                           |                                                                        |
| 36                                                                                                    |                          |                                                                       |                                                                                              |                                                                                     |                                                                                                                                 |                                                                           |                                                                        |
| 37                                                                                                    |                          |                                                                       |                                                                                              |                                                                                     |                                                                                                                                 |                                                                           |                                                                        |
| 38                                                                                                    |                          |                                                                       |                                                                                              |                                                                                     |                                                                                                                                 |                                                                           |                                                                        |
| 39                                                                                                    |                          |                                                                       |                                                                                              |                                                                                     |                                                                                                                                 |                                                                           |                                                                        |
| 40                                                                                                    |                          |                                                                       |                                                                                              |                                                                                     |                                                                                                                                 |                                                                           |                                                                        |

**PLEASE USE THE 8 DIGIT MEMID (SEE GROUPLIST)**

25. Who do you think is the **most informed person** among the group members concerning **nutrition** information?

\_\_\_\_\_ MEMID

26. Who do you think is the **most informed person** among the group members concerning **agricultural** information?

\_\_\_\_\_ MEMID

27. Why did you decide to become a group member? Give reason \_\_\_\_\_

28. Were you asked by another member to join the group \_\_\_\_\_ (Yes=1, No=0)

29. If yes: By whom? \_\_\_\_\_ ? MEMID

30. Have you introduced new people to this group? \_\_\_\_\_ (Yes=1, No=0)

31. If yes: Whom? MEMID \_\_\_\_\_ MEMID \_\_\_\_\_ MEMID \_\_\_\_\_

33. Please consider a situation where an organization offers agricultural training to your group.

However, the agricultural extension officers will only train 3 persons of your group. These persons are supposed to forward the information to the group.

Who do you think are the 3 most suitable persons of your group for this purpose?

MEMID \_\_\_\_\_ MEMID \_\_\_\_\_ MEMID \_\_\_\_\_

34. Do you like this approach or would you prefer that all group members should be able to participate in the training?

1=only 3 persons, 2= all group members

35. Now imagine the same situation, but the organization offers nutrition training to your group.

However, the NGO will only train 3 persons of your group,

Who do you think are the 3 most suitable persons of your group for this purpose?

MEMID \_\_\_\_\_ MEMID \_\_\_\_\_ MEMID \_\_\_\_\_

36. Do you like this approach or would you prefer that all group members should be able to participate in the training?

\_\_\_ 1=only 3 persons, 2= all group member

**19.2. SPECIFIC INTERACTIONS OUTSIDE THIS COMMON INTEREST GROUP**

19.2.1 Please name the persons outside of your common interest group you most frequently exchanged information about nutrition between Oct15/Sept16. Please name a maximum of 5 persons: OUT ID 40 OUT ID 40 OUT ID 40 OUT ID 40 OUT ID 40

19.2.2 Please name the persons outside of your common interest group you most frequently exchanged information about agriculture between Oct15/Sept16. Please name a maximum of 5 persons: OUT ID 40 OUT ID 40 OUT ID 40 OUT ID 40 OUT ID 40

| ID Section |      |                                          |                                                          |                                                                       |                                                                                                                                                   |                |                                                               |                                                                                                 |
|------------|------|------------------------------------------|----------------------------------------------------------|-----------------------------------------------------------------------|---------------------------------------------------------------------------------------------------------------------------------------------------|----------------|---------------------------------------------------------------|-------------------------------------------------------------------------------------------------|
| 1          | 2    | 3                                        | 4                                                        | 6                                                                     | 9                                                                                                                                                 | 10             | 12                                                            | 11                                                                                              |
| OUT ID     | Name | NAME's gender<br><i>Male=1, female=0</i> | Please specify your relationship to NAME<br><br><b>A</b> | How often did you talk with NAME between Oct15/Sep16?<br><br><b>B</b> | Did you lend or borrow any of the following production means from NAME between Oct15 and Sept16?<br>0=no<br>1=lend<br>2=borrow<br>3=lend & borrow |                | Do you exchange/share food items?<br><br><i>(1=Yes; 0=No)</i> | If you suddenly needed money, would you ask NAME to lend it to you?<br><br><i>(1=Yes; 0=No)</i> |
|            |      |                                          |                                                          |                                                                       | Seeds                                                                                                                                             | Agric. Produce |                                                               |                                                                                                 |
| 40         |      |                                          |                                                          |                                                                       |                                                                                                                                                   |                |                                                               |                                                                                                 |
| 40         |      |                                          |                                                          |                                                                       |                                                                                                                                                   |                |                                                               |                                                                                                 |
| 40         |      |                                          |                                                          |                                                                       |                                                                                                                                                   |                |                                                               |                                                                                                 |
| 40         |      |                                          |                                                          |                                                                       |                                                                                                                                                   |                |                                                               |                                                                                                 |
| 40         |      |                                          |                                                          |                                                                       |                                                                                                                                                   |                |                                                               |                                                                                                 |
| 40         |      |                                          |                                                          |                                                                       |                                                                                                                                                   |                |                                                               |                                                                                                 |
| 40         |      |                                          |                                                          |                                                                       |                                                                                                                                                   |                |                                                               |                                                                                                 |
| 40         |      |                                          |                                                          |                                                                       |                                                                                                                                                   |                |                                                               |                                                                                                 |
| 40         |      |                                          |                                                          |                                                                       |                                                                                                                                                   |                |                                                               |                                                                                                 |
| 40         |      |                                          |                                                          |                                                                       |                                                                                                                                                   |                |                                                               |                                                                                                 |

12. Who do you think is the **most informed person** among the ones named concerning **nutrition** information? 40 OUT ID

13. Who do you think is the **most informed person** among the ones named concerning **agriculture** information? 40 OUT ID

| Code A   |                |           |                      | Code B    |                       |           |                           |
|----------|----------------|-----------|----------------------|-----------|-----------------------|-----------|---------------------------|
| <b>1</b> | Parent         | <b>6</b>  | Grandchild           | <b>11</b> | Brother/Sister-in law | <b>16</b> | Attend same church/mosque |
| <b>2</b> | Spouse         | <b>7</b>  | Nephew/Nice          | <b>12</b> | Other relative        | <b>17</b> | Business colleague        |
| <b>3</b> | Child          | <b>8</b>  | Uncle/Aunt           | <b>13</b> | Neighbour             | <b>77</b> | Other, specify____        |
| <b>4</b> | Brother/sister | <b>9</b>  | Cousin               | <b>14</b> | Friend                |           |                           |
| <b>5</b> | Grandparent    | <b>10</b> | Mother/father in law | <b>15</b> | Fellow villager       |           |                           |
|          |                |           |                      |           |                       |           | <b>1</b> Very often       |
|          |                |           |                      |           |                       |           | <b>2</b> Often            |
|          |                |           |                      |           |                       |           | <b>3</b> Sometimes        |
|          |                |           |                      |           |                       |           | <b>4</b> Rarely           |

**TARGET PERSON: PERSON RESPONSIBLE FOR FOOD PREPARATION****MODULE 20: HOUSEHOLD FOOD CONSUMPTION – FOR THE LAST 7 DAYS**

Respondent MEMID: \_\_\_\_\_

20.0 Firstly, we would like to ask the following four questions before we continue to ask you about your household food consumption.

|   | <i>(Please enter the MEMID, if decision was jointly please enter both MEMID)</i> | <b>MEMID</b> | <b>MEMID</b> |
|---|----------------------------------------------------------------------------------|--------------|--------------|
| 1 | Who is mainly responsible for the food preparation in the household?             |              |              |
| 2 | Who is mainly responsible for food purchase in the household?                    |              |              |
| 3 | Who is the main decision maker on food expenditure in the household?             |              |              |
| 4 | Who is the main decision maker on non-food expenditure in the household?         |              |              |

Now we would like to ask about food consumption in the past seven days. Indicate how much of the following food items your household consumed, the prices in Ksh and the source of its origin (This is for all food consumed in the household, by all the people listed on demographic table in Module 1. INCLUDE food prepared at home but eaten outside. EXCLUDE meals prepared outside the home).

Ask how many people were present in the last 7 days? Please note down the number of household members in the following table. Please differentiate between female, male and children, as well as household members and visiting members. Fill in NA if a food item was not consumed in the last 7 days.

| 5                 | 6             | 7               | 8             | 9                | 10            | 11              | 12            |
|-------------------|---------------|-----------------|---------------|------------------|---------------|-----------------|---------------|
| Household members |               |                 |               | Visiting members |               |                 |               |
| <b>Adults</b>     |               | <b>Children</b> |               | <b>Adults</b>    |               | <b>Children</b> |               |
| <i>Male</i>       | <i>Female</i> | <i>Male</i>     | <i>Female</i> | <i>Male</i>      | <i>Female</i> | <i>Male</i>     | <i>Female</i> |
|                   |               |                 |               |                  |               |                 |               |

19. During the last 7 days did you have any special day (tea guests, chama, burial, wedding etc.), where you cooked more food than usual? (1=Yes, 0=No) \_\_\_\_\_

19.1 If yes to question 19, please specify (list number of people (adult/children)): \_\_\_\_\_ Number of days: \_\_\_\_\_

|                                        | 14                                                                   | 15                                              | 16 | 17                         |           |      |                                                | 18 |
|----------------------------------------|----------------------------------------------------------------------|-------------------------------------------------|----|----------------------------|-----------|------|------------------------------------------------|----|
|                                        |                                                                      |                                                 |    | Source (record quantities) |           |      |                                                |    |
|                                        |                                                                      |                                                 |    | Own production             | Purchased | Gift | Other, specify                                 |    |
| Food Items consumed in the past 7 DAYS | How much in total did your household consume during the last 7 days? | Unit of quantities consumed (Use codes above A) |    |                            |           |      | Average price per purchased unit <u>Ksh...</u> |    |
| 1                                      | <b>Staple foods</b>                                                  |                                                 |    |                            |           |      |                                                |    |
| 2                                      | Maize green                                                          |                                                 |    |                            |           |      |                                                |    |
| 3                                      | Maize grain                                                          |                                                 |    |                            |           |      |                                                |    |
| 4                                      | Maize flour                                                          |                                                 |    |                            |           |      |                                                |    |
| 5                                      | Yam Tuber                                                            |                                                 |    |                            |           |      |                                                |    |
| 6                                      | Yam flour                                                            |                                                 |    |                            |           |      |                                                |    |
| 7                                      | Cassava Tuber                                                        |                                                 |    |                            |           |      |                                                |    |
| 8                                      | Cassava flour                                                        |                                                 |    |                            |           |      |                                                |    |
| 9                                      | Orange fleshed sweet potato                                          |                                                 |    |                            |           |      |                                                |    |
| 10                                     | Other sweet potato                                                   |                                                 |    |                            |           |      |                                                |    |
| 11                                     | Irish potato                                                         |                                                 |    |                            |           |      |                                                |    |
| 12                                     | Irish potato chips                                                   |                                                 |    |                            |           |      |                                                |    |
| 13                                     | Arrowroots                                                           |                                                 |    |                            |           |      |                                                |    |
| 14                                     | Sorghum grain                                                        |                                                 |    |                            |           |      |                                                |    |
| 15                                     | Sorghum Flour                                                        |                                                 |    |                            |           |      |                                                |    |
| 16                                     | Millet grain                                                         |                                                 |    |                            |           |      |                                                |    |
| 17                                     | Millet flour                                                         |                                                 |    |                            |           |      |                                                |    |
| 18                                     | Brown rice                                                           |                                                 |    |                            |           |      |                                                |    |
| 19                                     | White rice                                                           |                                                 |    |                            |           |      |                                                |    |
| 20                                     | Wheat grain                                                          |                                                 |    |                            |           |      |                                                |    |
| 21                                     | Wheat flour brown                                                    |                                                 |    |                            |           |      |                                                |    |
| 22                                     | Wheat flour white                                                    |                                                 |    |                            |           |      |                                                |    |
| 23                                     | Cooking banana                                                       |                                                 |    |                            |           |      |                                                |    |
| 24                                     | <b>Other staple foods</b>                                            |                                                 |    |                            |           |      |                                                |    |
| 25                                     |                                                                      |                                                 |    |                            |           |      |                                                |    |
| 26                                     |                                                                      |                                                 |    |                            |           |      |                                                |    |
| 27                                     |                                                                      |                                                 |    |                            |           |      |                                                |    |
| 28                                     | <b>Vegetables</b>                                                    |                                                 |    |                            |           |      |                                                |    |
| 29                                     | Amaranth leaves (Emboga)                                             |                                                 |    |                            |           |      |                                                |    |
| 30                                     | Black night shade (Rinagu)                                           |                                                 |    |                            |           |      |                                                |    |
| 31                                     | Butternut                                                            |                                                 |    |                            |           |      |                                                |    |
| 32                                     | Cabbage                                                              |                                                 |    |                            |           |      |                                                |    |

|                                        | 14                                                                   | 15                                              | 16 | 17                         |           |      |                                                | 18 |
|----------------------------------------|----------------------------------------------------------------------|-------------------------------------------------|----|----------------------------|-----------|------|------------------------------------------------|----|
|                                        |                                                                      |                                                 |    | Source (record quantities) |           |      |                                                |    |
|                                        |                                                                      |                                                 |    | Own production             | Purchased | Gift | Other, specify                                 |    |
| Food Items consumed in the past 7 DAYS | How much in total did your household consume during the last 7 days? | Unit of quantities consumed (Use codes above A) |    |                            |           |      | Average price per purchased unit <u>Ksh...</u> |    |
| 33                                     | Carrot                                                               |                                                 |    |                            |           |      |                                                |    |
| 34                                     | Cow pea leaves                                                       |                                                 |    |                            |           |      |                                                |    |
| 35                                     | Cucumber                                                             |                                                 |    |                            |           |      |                                                |    |
| 36                                     | Eggplant                                                             |                                                 |    |                            |           |      |                                                |    |
| 203                                    | Ginger                                                               |                                                 |    |                            |           |      |                                                |    |
| 37                                     | Jute mallow (Omotere)                                                |                                                 |    |                            |           |      |                                                |    |
| 38                                     | Kales (Sukuma)                                                       |                                                 |    |                            |           |      |                                                |    |
| 39                                     | Mushrooms                                                            |                                                 |    |                            |           |      |                                                |    |
| 40                                     | Okra                                                                 |                                                 |    |                            |           |      |                                                |    |
| 41                                     | Onion                                                                |                                                 |    |                            |           |      |                                                |    |
| 42                                     | Pepper/Capsicum (Hoho)                                               |                                                 |    |                            |           |      |                                                |    |
| 204                                    | Chili/Pepper                                                         |                                                 |    |                            |           |      |                                                |    |
| 43                                     | Pumpkin                                                              |                                                 |    |                            |           |      |                                                |    |
| 44                                     | Pumpkin leaves (Risosa)                                              |                                                 |    |                            |           |      |                                                |    |
| 45                                     | Spider plant (Chinsaga)                                              |                                                 |    |                            |           |      |                                                |    |
| 46                                     | Spinach                                                              |                                                 |    |                            |           |      |                                                |    |
| 47                                     | Stinging nettle (rise)                                               |                                                 |    |                            |           |      |                                                |    |
| 48                                     | Sweet potato leaves                                                  |                                                 |    |                            |           |      |                                                |    |
| 49                                     | Tomato                                                               |                                                 |    |                            |           |      |                                                |    |
| 50                                     | Vine spinach (Enerema)                                               |                                                 |    |                            |           |      |                                                |    |
| 51                                     | <b>Other vegetables</b>                                              |                                                 |    |                            |           |      |                                                |    |
| 52                                     |                                                                      |                                                 |    |                            |           |      |                                                |    |
| 53                                     |                                                                      |                                                 |    |                            |           |      |                                                |    |
| 54                                     |                                                                      |                                                 |    |                            |           |      |                                                |    |
| 55                                     | <b>Nuts and Pulses</b>                                               |                                                 |    |                            |           |      |                                                |    |
| 200                                    | KK 15 (fresh+dry)                                                    |                                                 |    |                            |           |      |                                                |    |
| 56                                     | Beans dry                                                            |                                                 |    |                            |           |      |                                                |    |
| 57                                     | Beans fresh                                                          |                                                 |    |                            |           |      |                                                |    |
| 58                                     | Black Bean                                                           |                                                 |    |                            |           |      |                                                |    |
| 59                                     | Cashew nut                                                           |                                                 |    |                            |           |      |                                                |    |

|        |            |          |               |    |          |           |           |           |       |              |          |          |         |               |          |                 |                 |                |                |
|--------|------------|----------|---------------|----|----------|-----------|-----------|-----------|-------|--------------|----------|----------|---------|---------------|----------|-----------------|-----------------|----------------|----------------|
| Code A | 3          | Teaspoon | 6             | Kg | 9        | 10 kg bag | 12        | 90 kg bag | 16    | Piece/Counts | 19       | 1 kg tin | 25      | Pint (500 ml) | 33       | Black Paper Bag | 77              | Others Specify |                |
| 1      | Liter      | 4        | Tablespoon    | 7  | Gram     | 10        | 25 kg bag | 13        | Debe  | 17           | ¼ kg tin | 21       | Bundles | 26            | Gorogoro | 34              | Green Paper Bag | 78             | Others Specify |
| 2      | Milliliter | 5        | Serving spoon | 8  | 5 kg bag | 11        | 50 kg bag | 14        | Bunch | 18           | ½ kg tin | 22       | Handful | 31            | Cob      | 40              | Stick           | 79             | Others Specify |

|    | 14                                                    |  |  |  | 15                                                                   |  |  |  | 16                                              |  |  |  | 17                         |  |  |  | 17a            |  |  |  | 17b       |  |  |  | 17c  |  |  |  | 18             |  |  |  |                                                |  |  |  |
|----|-------------------------------------------------------|--|--|--|----------------------------------------------------------------------|--|--|--|-------------------------------------------------|--|--|--|----------------------------|--|--|--|----------------|--|--|--|-----------|--|--|--|------|--|--|--|----------------|--|--|--|------------------------------------------------|--|--|--|
|    | Food Items consumed in the past 7 DAYS                |  |  |  | How much in total did your household consume during the last 7 days? |  |  |  | Unit of quantities consumed (Use codes above A) |  |  |  | Source (record quantities) |  |  |  | Own production |  |  |  | Purchased |  |  |  | Gift |  |  |  | Other, specify |  |  |  | Average price per purchased unit <u>Ksh...</u> |  |  |  |
|    |                                                       |  |  |  |                                                                      |  |  |  |                                                 |  |  |  |                            |  |  |  |                |  |  |  |           |  |  |  |      |  |  |  |                |  |  |  |                                                |  |  |  |
| 60 | Green grams                                           |  |  |  |                                                                      |  |  |  |                                                 |  |  |  |                            |  |  |  |                |  |  |  |           |  |  |  |      |  |  |  |                |  |  |  |                                                |  |  |  |
| 61 | Groundnut (boild)                                     |  |  |  |                                                                      |  |  |  |                                                 |  |  |  |                            |  |  |  |                |  |  |  |           |  |  |  |      |  |  |  |                |  |  |  |                                                |  |  |  |
| 62 | Groundnut (roasted)                                   |  |  |  |                                                                      |  |  |  |                                                 |  |  |  |                            |  |  |  |                |  |  |  |           |  |  |  |      |  |  |  |                |  |  |  |                                                |  |  |  |
| 63 | Lentils                                               |  |  |  |                                                                      |  |  |  |                                                 |  |  |  |                            |  |  |  |                |  |  |  |           |  |  |  |      |  |  |  |                |  |  |  |                                                |  |  |  |
| 64 | Peas (incl cowpea (Egesare), pigeon peas, green peas) |  |  |  |                                                                      |  |  |  |                                                 |  |  |  |                            |  |  |  |                |  |  |  |           |  |  |  |      |  |  |  |                |  |  |  |                                                |  |  |  |
| 65 | Sesame seeds                                          |  |  |  |                                                                      |  |  |  |                                                 |  |  |  |                            |  |  |  |                |  |  |  |           |  |  |  |      |  |  |  |                |  |  |  |                                                |  |  |  |
| 66 | Soya meat                                             |  |  |  |                                                                      |  |  |  |                                                 |  |  |  |                            |  |  |  |                |  |  |  |           |  |  |  |      |  |  |  |                |  |  |  |                                                |  |  |  |
| 67 | Soybean                                               |  |  |  |                                                                      |  |  |  |                                                 |  |  |  |                            |  |  |  |                |  |  |  |           |  |  |  |      |  |  |  |                |  |  |  |                                                |  |  |  |
| 68 | Soybean flour                                         |  |  |  |                                                                      |  |  |  |                                                 |  |  |  |                            |  |  |  |                |  |  |  |           |  |  |  |      |  |  |  |                |  |  |  |                                                |  |  |  |
| 69 | <b>Other pulses and nuts</b>                          |  |  |  |                                                                      |  |  |  |                                                 |  |  |  |                            |  |  |  |                |  |  |  |           |  |  |  |      |  |  |  |                |  |  |  |                                                |  |  |  |
| 70 |                                                       |  |  |  |                                                                      |  |  |  |                                                 |  |  |  |                            |  |  |  |                |  |  |  |           |  |  |  |      |  |  |  |                |  |  |  |                                                |  |  |  |
| 71 |                                                       |  |  |  |                                                                      |  |  |  |                                                 |  |  |  |                            |  |  |  |                |  |  |  |           |  |  |  |      |  |  |  |                |  |  |  |                                                |  |  |  |
| 72 |                                                       |  |  |  |                                                                      |  |  |  |                                                 |  |  |  |                            |  |  |  |                |  |  |  |           |  |  |  |      |  |  |  |                |  |  |  |                                                |  |  |  |
| 73 | <b>Fruits</b>                                         |  |  |  |                                                                      |  |  |  |                                                 |  |  |  |                            |  |  |  |                |  |  |  |           |  |  |  |      |  |  |  |                |  |  |  |                                                |  |  |  |
| 74 | Apple                                                 |  |  |  |                                                                      |  |  |  |                                                 |  |  |  |                            |  |  |  |                |  |  |  |           |  |  |  |      |  |  |  |                |  |  |  |                                                |  |  |  |
| 75 | Avocado                                               |  |  |  |                                                                      |  |  |  |                                                 |  |  |  |                            |  |  |  |                |  |  |  |           |  |  |  |      |  |  |  |                |  |  |  |                                                |  |  |  |
| 76 | Coconut                                               |  |  |  |                                                                      |  |  |  |                                                 |  |  |  |                            |  |  |  |                |  |  |  |           |  |  |  |      |  |  |  |                |  |  |  |                                                |  |  |  |
| 77 | Guava                                                 |  |  |  |                                                                      |  |  |  |                                                 |  |  |  |                            |  |  |  |                |  |  |  |           |  |  |  |      |  |  |  |                |  |  |  |                                                |  |  |  |
| 78 | Melon                                                 |  |  |  |                                                                      |  |  |  |                                                 |  |  |  |                            |  |  |  |                |  |  |  |           |  |  |  |      |  |  |  |                |  |  |  |                                                |  |  |  |
| 79 | Orange                                                |  |  |  |                                                                      |  |  |  |                                                 |  |  |  |                            |  |  |  |                |  |  |  |           |  |  |  |      |  |  |  |                |  |  |  |                                                |  |  |  |
| 80 | Passion fruit                                         |  |  |  |                                                                      |  |  |  |                                                 |  |  |  |                            |  |  |  |                |  |  |  |           |  |  |  |      |  |  |  |                |  |  |  |                                                |  |  |  |
| 81 | Physalis/goose berry                                  |  |  |  |                                                                      |  |  |  |                                                 |  |  |  |                            |  |  |  |                |  |  |  |           |  |  |  |      |  |  |  |                |  |  |  |                                                |  |  |  |
| 82 | Pineapple                                             |  |  |  |                                                                      |  |  |  |                                                 |  |  |  |                            |  |  |  |                |  |  |  |           |  |  |  |      |  |  |  |                |  |  |  |                                                |  |  |  |
| 83 | Ripe bananas                                          |  |  |  |                                                                      |  |  |  |                                                 |  |  |  |                            |  |  |  |                |  |  |  |           |  |  |  |      |  |  |  |                |  |  |  |                                                |  |  |  |
| 84 | Ripe mango                                            |  |  |  |                                                                      |  |  |  |                                                 |  |  |  |                            |  |  |  |                |  |  |  |           |  |  |  |      |  |  |  |                |  |  |  |                                                |  |  |  |
| 85 | Ripe pawpaw                                           |  |  |  |                                                                      |  |  |  |                                                 |  |  |  |                            |  |  |  |                |  |  |  |           |  |  |  |      |  |  |  |                |  |  |  |                                                |  |  |  |
| 86 | Sugar cane                                            |  |  |  |                                                                      |  |  |  |                                                 |  |  |  |                            |  |  |  |                |  |  |  |           |  |  |  |      |  |  |  |                |  |  |  |                                                |  |  |  |
| 87 | <b>Other fruits</b>                                   |  |  |  |                                                                      |  |  |  |                                                 |  |  |  |                            |  |  |  |                |  |  |  |           |  |  |  |      |  |  |  |                |  |  |  |                                                |  |  |  |
| 88 |                                                       |  |  |  |                                                                      |  |  |  |                                                 |  |  |  |                            |  |  |  |                |  |  |  |           |  |  |  |      |  |  |  |                |  |  |  |                                                |  |  |  |
| 89 |                                                       |  |  |  |                                                                      |  |  |  |                                                 |  |  |  |                            |  |  |  |                |  |  |  |           |  |  |  |      |  |  |  |                |  |  |  |                                                |  |  |  |
| 90 |                                                       |  |  |  |                                                                      |  |  |  |                                                 |  |  |  |                            |  |  |  |                |  |  |  |           |  |  |  |      |  |  |  |                |  |  |  |                                                |  |  |  |
| 91 | <b>Meat and animal Products</b>                       |  |  |  |                                                                      |  |  |  |                                                 |  |  |  |                            |  |  |  |                |  |  |  |           |  |  |  |      |  |  |  |                |  |  |  |                                                |  |  |  |
| 92 | Beef sausage                                          |  |  |  |                                                                      |  |  |  |                                                 |  |  |  |                            |  |  |  |                |  |  |  |           |  |  |  |      |  |  |  |                |  |  |  |                                                |  |  |  |

|     | 14                                     |  |  |  | 15                                                                   |  |  |  | 16                                              |  |  |  | 17                         |  |  |  | 17a            |  |  |  | 17b       |  |  |  | 17c  |  |  |  | 18             |  |  |  |                                                |  |  |  |
|-----|----------------------------------------|--|--|--|----------------------------------------------------------------------|--|--|--|-------------------------------------------------|--|--|--|----------------------------|--|--|--|----------------|--|--|--|-----------|--|--|--|------|--|--|--|----------------|--|--|--|------------------------------------------------|--|--|--|
|     | Food Items consumed in the past 7 DAYS |  |  |  | How much in total did your household consume during the last 7 days? |  |  |  | Unit of quantities consumed (Use codes above A) |  |  |  | Source (record quantities) |  |  |  | Own production |  |  |  | Purchased |  |  |  | Gift |  |  |  | Other, specify |  |  |  | Average price per purchased unit <u>Ksh...</u> |  |  |  |
|     |                                        |  |  |  |                                                                      |  |  |  |                                                 |  |  |  |                            |  |  |  |                |  |  |  |           |  |  |  |      |  |  |  |                |  |  |  |                                                |  |  |  |
| 93  | Bush meat (Game meat)                  |  |  |  |                                                                      |  |  |  |                                                 |  |  |  |                            |  |  |  |                |  |  |  |           |  |  |  |      |  |  |  |                |  |  |  |                                                |  |  |  |
| 201 | Kuroiler Chicken                       |  |  |  |                                                                      |  |  |  |                                                 |  |  |  |                            |  |  |  |                |  |  |  |           |  |  |  |      |  |  |  |                |  |  |  |                                                |  |  |  |
| 94  | Chicken                                |  |  |  |                                                                      |  |  |  |                                                 |  |  |  |                            |  |  |  |                |  |  |  |           |  |  |  |      |  |  |  |                |  |  |  |                                                |  |  |  |
| 95  | Chicken sausage                        |  |  |  |                                                                      |  |  |  |                                                 |  |  |  |                            |  |  |  |                |  |  |  |           |  |  |  |      |  |  |  |                |  |  |  |                                                |  |  |  |
| 96  | Cow meat                               |  |  |  |                                                                      |  |  |  |                                                 |  |  |  |                            |  |  |  |                |  |  |  |           |  |  |  |      |  |  |  |                |  |  |  |                                                |  |  |  |
| 202 | Kuroiler Eggs (pieces)                 |  |  |  |                                                                      |  |  |  |                                                 |  |  |  |                            |  |  |  |                |  |  |  |           |  |  |  |      |  |  |  |                |  |  |  |                                                |  |  |  |
| 97  | Eggs (pieces)                          |  |  |  |                                                                      |  |  |  |                                                 |  |  |  |                            |  |  |  |                |  |  |  |           |  |  |  |      |  |  |  |                |  |  |  |                                                |  |  |  |
| 98  | Fish                                   |  |  |  |                                                                      |  |  |  |                                                 |  |  |  |                            |  |  |  |                |  |  |  |           |  |  |  |      |  |  |  |                |  |  |  |                                                |  |  |  |
| 99  | Goat/ Sheep meat                       |  |  |  |                                                                      |  |  |  |                                                 |  |  |  |                            |  |  |  |                |  |  |  |           |  |  |  |      |  |  |  |                |  |  |  |                                                |  |  |  |
| 100 | Liver (from any animal)                |  |  |  |                                                                      |  |  |  |                                                 |  |  |  |                            |  |  |  |                |  |  |  |           |  |  |  |      |  |  |  |                |  |  |  |                                                |  |  |  |
| 101 | Offal's (matumbo)                      |  |  |  |                                                                      |  |  |  |                                                 |  |  |  |                            |  |  |  |                |  |  |  |           |  |  |  |      |  |  |  |                |  |  |  |                                                |  |  |  |
| 102 | Pork                                   |  |  |  |                                                                      |  |  |  |                                                 |  |  |  |                            |  |  |  |                |  |  |  |           |  |  |  |      |  |  |  |                |  |  |  |                                                |  |  |  |
| 103 | Sardine (dagaa)                        |  |  |  |                                                                      |  |  |  |                                                 |  |  |  |                            |  |  |  |                |  |  |  |           |  |  |  |      |  |  |  |                |  |  |  |                                                |  |  |  |
| 104 | Termites                               |  |  |  |                                                                      |  |  |  |                                                 |  |  |  |                            |  |  |  |                |  |  |  |           |  |  |  |      |  |  |  |                |  |  |  |                                                |  |  |  |
| 105 | Turkey (batamzinga)                    |  |  |  |                                                                      |  |  |  |                                                 |  |  |  |                            |  |  |  |                |  |  |  |           |  |  |  |      |  |  |  |                |  |  |  |                                                |  |  |  |
| 106 | <b>Other meats</b>                     |  |  |  |                                                                      |  |  |  |                                                 |  |  |  |                            |  |  |  |                |  |  |  |           |  |  |  |      |  |  |  |                |  |  |  |                                                |  |  |  |
| 107 |                                        |  |  |  |                                                                      |  |  |  |                                                 |  |  |  |                            |  |  |  |                |  |  |  |           |  |  |  |      |  |  |  |                |  |  |  |                                                |  |  |  |
| 108 |                                        |  |  |  |                                                                      |  |  |  |                                                 |  |  |  |                            |  |  |  |                |  |  |  |           |  |  |  |      |  |  |  |                |  |  |  |                                                |  |  |  |
| 109 |                                        |  |  |  |                                                                      |  |  |  |                                                 |  |  |  |                            |  |  |  |                |  |  |  |           |  |  |  |      |  |  |  |                |  |  |  |                                                |  |  |  |
| 110 | <b>Dairy products</b>                  |  |  |  |                                                                      |  |  |  |                                                 |  |  |  |                            |  |  |  |                |  |  |  |           |  |  |  |      |  |  |  |                |  |  |  |                                                |  |  |  |
| 111 | Cheese                                 |  |  |  |                                                                      |  |  |  |                                                 |  |  |  |                            |  |  |  |                |  |  |  |           |  |  |  |      |  |  |  |                |  |  |  |                                                |  |  |  |
| 112 | Ice cream                              |  |  |  |                                                                      |  |  |  |                                                 |  |  |  |                            |  |  |  |                |  |  |  |           |  |  |  |      |  |  |  |                |  |  |  |                                                |  |  |  |
| 113 | Milk (cow/goat milk)                   |  |  |  |                                                                      |  |  |  |                                                 |  |  |  |                            |  |  |  |                |  |  |  |           |  |  |  |      |  |  |  |                |  |  |  |                                                |  |  |  |
| 114 | Powdered milk                          |  |  |  |                                                                      |  |  |  |                                                 |  |  |  |                            |  |  |  |                |  |  |  |           |  |  |  |      |  |  |  |                |  |  |  |                                                |  |  |  |
| 115 | Sour milk (mala)                       |  |  |  |                                                                      |  |  |  |                                                 |  |  |  |                            |  |  |  |                |  |  |  |           |  |  |  |      |  |  |  |                |  |  |  |                                                |  |  |  |
| 116 | Yoghurt                                |  |  |  |                                                                      |  |  |  |                                                 |  |  |  |                            |  |  |  |                |  |  |  |           |  |  |  |      |  |  |  |                |  |  |  |                                                |  |  |  |
| 117 | <b>Other dairy product</b>             |  |  |  |                                                                      |  |  |  |                                                 |  |  |  |                            |  |  |  |                |  |  |  |           |  |  |  |      |  |  |  |                |  |  |  |                                                |  |  |  |
| 118 |                                        |  |  |  |                                                                      |  |  |  |                                                 |  |  |  |                            |  |  |  |                |  |  |  |           |  |  |  |      |  |  |  |                |  |  |  |                                                |  |  |  |
| 119 |                                        |  |  |  |                                                                      |  |  |  |                                                 |  |  |  |                            |  |  |  |                |  |  |  |           |  |  |  |      |  |  |  |                |  |  |  |                                                |  |  |  |
| 120 |                                        |  |  |  |                                                                      |  |  |  |                                                 |  |  |  |                            |  |  |  |                |  |  |  |           |  |  |  |      |  |  |  |                |  |  |  |                                                |  |  |  |
| 121 | <b>Beverages</b>                       |  |  |  |                                                                      |  |  |  |                                                 |  |  |  |                            |  |  |  |                |  |  |  |           |  |  |  |      |  |  |  |                |  |  |  |                                                |  |  |  |
| 122 | Cocoa powder                           |  |  |  |                                                                      |  |  |  |                                                 |  |  |  |                            |  |  |  |                |  |  |  |           |  |  |  |      |  |  |  |                |  |  |  |                                                |  |  |  |

|        |            |          |               |    |          |           |           |           |       |              |          |          |         |               |          |                 |                 |                |                |
|--------|------------|----------|---------------|----|----------|-----------|-----------|-----------|-------|--------------|----------|----------|---------|---------------|----------|-----------------|-----------------|----------------|----------------|
| Code A | 3          | Teaspoon | 6             | Kg | 9        | 10 kg bag | 12        | 90 kg bag | 16    | Piece/Counts | 19       | 1 kg tin | 25      | Pint (500 ml) | 33       | Black Paper Bag | 77              | Others Specify |                |
| 1      | Liter      | 4        | Tablespoon    | 7  | Gram     | 10        | 25 kg bag | 13        | Debe  | 17           | ¼ kg tin | 21       | Bundles | 26            | Gorogoro | 34              | Green Paper Bag | 78             | Others Specify |
| 2      | Milliliter | 5        | Serving spoon | 8  | 5 kg bag | 11        | 50 kg bag | 14        | Bunch | 18           | ½ kg tin | 22       | Handful | 31            | Cob      | 40              | Stick           | 79             | Others Specify |



|                                        | 14                                                                   | 15                                              | 16                         | 17        |      |                |                                                | 18 |
|----------------------------------------|----------------------------------------------------------------------|-------------------------------------------------|----------------------------|-----------|------|----------------|------------------------------------------------|----|
|                                        |                                                                      |                                                 |                            | 17a       | 17b  | 17c            |                                                |    |
| Food Items consumed in the past 7 DAYS | How much in total did your household consume during the last 7 days? | Unit of quantities consumed (Use codes above A) | Source (record quantities) |           |      |                | Average price per purchased unit <u>Ksh...</u> |    |
|                                        |                                                                      |                                                 | Own production             | Purchased | Gift | Other, specify |                                                |    |
| 123                                    | Coffee (powder)                                                      |                                                 |                            |           |      |                |                                                |    |
| 124                                    | Drinking chocolate                                                   |                                                 |                            |           |      |                |                                                |    |
| 125                                    | Milo powder                                                          |                                                 |                            |           |      |                |                                                |    |
| 126                                    | Soya powder                                                          |                                                 |                            |           |      |                |                                                |    |
| 127                                    | Tea (leaves)                                                         |                                                 |                            |           |      |                |                                                |    |
| 128                                    | <b>Other beverages</b>                                               |                                                 |                            |           |      |                |                                                |    |
| 129                                    |                                                                      |                                                 |                            |           |      |                |                                                |    |
| 130                                    |                                                                      |                                                 |                            |           |      |                |                                                |    |
| 131                                    | <b>Drinks</b>                                                        |                                                 |                            |           |      |                |                                                |    |
| 132                                    | Apple juice                                                          |                                                 |                            |           |      |                |                                                |    |
| 133                                    | Bottled beer                                                         |                                                 |                            |           |      |                |                                                |    |
| 134                                    | Local beer                                                           |                                                 |                            |           |      |                |                                                |    |
| 135                                    | Orange juice                                                         |                                                 |                            |           |      |                |                                                |    |
| 136                                    | Pineapple juice                                                      |                                                 |                            |           |      |                |                                                |    |
| 137                                    | Other juice (concentrates)                                           |                                                 |                            |           |      |                |                                                |    |
| 138                                    | Soft drinks (coke/fanta/etc)                                         |                                                 |                            |           |      |                |                                                |    |
| 139                                    | Wine                                                                 |                                                 |                            |           |      |                |                                                |    |
| 140                                    | <b>Other drinks</b>                                                  |                                                 |                            |           |      |                |                                                |    |
| 141                                    | Water (Drinking)                                                     |                                                 |                            |           |      |                |                                                |    |
| 142                                    |                                                                      |                                                 |                            |           |      |                |                                                |    |
| 143                                    | <b>Condiments and spices</b>                                         |                                                 |                            |           |      |                |                                                |    |
| 144                                    | Salt                                                                 |                                                 |                            |           |      |                |                                                |    |
| 145                                    | Curry (Powder)                                                       |                                                 |                            |           |      |                |                                                |    |
| 146                                    | Ginger (tangawizi; Powder)                                           |                                                 |                            |           |      |                |                                                |    |
| 147                                    | Ketchup, Tomato sauce                                                |                                                 |                            |           |      |                |                                                |    |
| 148                                    | Black Pepper (Powder)                                                |                                                 |                            |           |      |                |                                                |    |
| 149                                    | <b>Other Condiments and spices</b>                                   |                                                 |                            |           |      |                |                                                |    |
| 150                                    |                                                                      |                                                 |                            |           |      |                |                                                |    |
| 151                                    |                                                                      |                                                 |                            |           |      |                |                                                |    |
| 152                                    |                                                                      |                                                 |                            |           |      |                |                                                |    |

|                                        | 14                                                                   | 15                                              | 16                         | 17        |      |                |                                                | 18 |
|----------------------------------------|----------------------------------------------------------------------|-------------------------------------------------|----------------------------|-----------|------|----------------|------------------------------------------------|----|
|                                        |                                                                      |                                                 |                            | 17a       | 17b  | 17c            |                                                |    |
| Food Items consumed in the past 7 DAYS | How much in total did your household consume during the last 7 days? | Unit of quantities consumed (Use codes above A) | Source (record quantities) |           |      |                | Average price per purchased unit <u>Ksh...</u> |    |
|                                        |                                                                      |                                                 | Own production             | Purchased | Gift | Other, specify |                                                |    |
| 153                                    | <b>Snacks (Bought ones, don't account into flour)</b>                |                                                 |                            |           |      |                |                                                |    |
| 154                                    | Bread                                                                |                                                 |                            |           |      |                |                                                |    |
| 155                                    | Biscuit/cookies                                                      |                                                 |                            |           |      |                |                                                |    |
| 156                                    | Popcorn                                                              |                                                 |                            |           |      |                |                                                |    |
| 157                                    | Cakes                                                                |                                                 |                            |           |      |                |                                                |    |
| 158                                    | Mandazi                                                              |                                                 |                            |           |      |                |                                                |    |
| 159                                    | <b>Other snacks</b>                                                  |                                                 |                            |           |      |                |                                                |    |
| 160                                    |                                                                      |                                                 |                            |           |      |                |                                                |    |
| 161                                    |                                                                      |                                                 |                            |           |      |                |                                                |    |
| 162                                    | <b>Sugar and sweets</b>                                              |                                                 |                            |           |      |                |                                                |    |
| 163                                    | Sugar                                                                |                                                 |                            |           |      |                |                                                |    |
| 164                                    | Chocolate                                                            |                                                 |                            |           |      |                |                                                |    |
| 165                                    | Honey                                                                |                                                 |                            |           |      |                |                                                |    |
| 166                                    | Sweets                                                               |                                                 |                            |           |      |                |                                                |    |
| 167                                    | <b>Other sugar and sweets</b>                                        |                                                 |                            |           |      |                |                                                |    |
| 168                                    |                                                                      |                                                 |                            |           |      |                |                                                |    |
| 169                                    |                                                                      |                                                 |                            |           |      |                |                                                |    |
| 170                                    | <b>Fat and Oil</b>                                                   |                                                 |                            |           |      |                |                                                |    |
| 171                                    | Animal fat                                                           |                                                 |                            |           |      |                |                                                |    |
| 172                                    | Butter                                                               |                                                 |                            |           |      |                |                                                |    |
| 173                                    | Corn Oil                                                             |                                                 |                            |           |      |                |                                                |    |
| 174                                    | Groundnut Oil                                                        |                                                 |                            |           |      |                |                                                |    |
| 175                                    | Margarine                                                            |                                                 |                            |           |      |                |                                                |    |
| 176                                    | Sunflower Oil                                                        |                                                 |                            |           |      |                |                                                |    |
| 177                                    | Vegetable Oil                                                        |                                                 |                            |           |      |                |                                                |    |
| 178                                    | Vegetables Fat                                                       |                                                 |                            |           |      |                |                                                |    |
| 179                                    | <b>Other oil</b>                                                     |                                                 |                            |           |      |                |                                                |    |
| 180                                    |                                                                      |                                                 |                            |           |      |                |                                                |    |
| 181                                    |                                                                      |                                                 |                            |           |      |                |                                                |    |

|        |            |          |               |    |          |           |           |           |       |              |          |          |         |               |          |                 |                 |                |                |
|--------|------------|----------|---------------|----|----------|-----------|-----------|-----------|-------|--------------|----------|----------|---------|---------------|----------|-----------------|-----------------|----------------|----------------|
| Code A | 3          | Teaspoon | 6             | Kg | 9        | 10 kg bag | 12        | 90 kg bag | 16    | Piece/Counts | 19       | 1 kg tin | 25      | Pint (500 ml) | 33       | Black Paper Bag | 77              | Others Specify |                |
| 1      | Liter      | 4        | Tablespoon    | 7  | Gram     | 10        | 25 kg bag | 13        | Debe  | 17           | ¼ kg tin | 21       | Bundles | 26            | Gorogoro | 34              | Green Paper Bag | 78             | Others Specify |
| 2      | Milliliter | 5        | Serving spoon | 8  | 5 kg bag | 11        | 50 kg bag | 14        | Bunch | 18           | ½ kg tin | 22       | Handful | 31            | Cob      | 40              | Stick           | 79             | Others Specify |

**TARGET PERSON: Mother or caretaker of child between the age of six to 59 months**

**MODULE 21: CHILD QUESTIONNAIRE – ONLY ONE CHILD WILL BE CONSIDERED**

**Respondent MEMID:** \_\_\_\_\_

Please only ask this section to households that have children **under the age of 5 years**. Check first and probe if you are not sure! Ask the following questions to the person who is mainly responsible for the child care, e.g. mother, father, grandmother etc.)

If **NO** Child under 5 years is living in the household, please go to the next Module 22. If more than one child is under the age of 5 years, please choose the child of the group member. If not applicable choose child where respondent is available. If there is more than one child in the age range please choose randomly.

| 1              | 2    | 3a                                                                    | 3b    | 3c   | 4            | 5                                     | 6                                                                                                                    |
|----------------|------|-----------------------------------------------------------------------|-------|------|--------------|---------------------------------------|----------------------------------------------------------------------------------------------------------------------|
| MEMID of child | Name | Date of Birth<br><i>(please check with birth card; don't know=88)</i> |       |      | Age in month | Health card present?<br>(No=0, Yes=1) | Which relationship to Child do you have?<br><i>(Respondent of this section, insert code below )</i><br><b>Code A</b> |
|                |      | Day                                                                   | Month | Year |              |                                       |                                                                                                                      |
|                |      |                                                                       |       |      |              |                                       |                                                                                                                      |

**Code A**

- |   |                         |    |                       |
|---|-------------------------|----|-----------------------|
| 1 | Father                  | 6  | Stepfather/stepmother |
| 2 | Mother                  | 7  | Cousin                |
| 3 | Grandmother/grandfather | 8  | Remote relative       |
| 4 | Sister/brother          | 9  | Care taker            |
| 5 | Aunt/uncle              | 77 | Others, specify _____ |

| <b>PART 1: CHILD ANTHROPOMETRIC</b>                                                                                                                                                                          |      |             |      |                     |      |      |
|--------------------------------------------------------------------------------------------------------------------------------------------------------------------------------------------------------------|------|-------------|------|---------------------|------|------|
| In this section we would like to take the height, weight and mid-upper arm circumferences of your child. We will do this twice by two different enumerators to make sure to get the right weight and height. |      |             |      |                     |      |      |
| 1                                                                                                                                                                                                            | 1a   | 2           | 2a   | 3                   | 3a   | 3b   |
| Weight (kg)                                                                                                                                                                                                  |      | Height (cm) |      | MUAC (measure tape) |      |      |
| Data                                                                                                                                                                                                         | Data | Data        | Data | Data                | Data | Data |
|                                                                                                                                                                                                              |      |             |      |                     |      |      |



**PART 3 Child: Dietary Recall from YESTERDAY (24hr DR) → INDICATE ONLY FOOD ITEMS**

**CHILD MEMID:** \_\_\_\_\_

Now I would like to ask you about everything (including snacks) that (CHILD) ate yesterday during the day or night, whether at home or outside of the home. *Continue through the day, until respondent indicates child went to sleep until the next day. If respondent mentions a mixed dish like a porridge, relish or stew, ask about all ingredients that went into the dish, including added oil, sugar or condiments. Probe for drinks & fruits.*

|                                                              |                 |                |                                    |                    |                 |                |                                |                                            |                                         |  |
|--------------------------------------------------------------|-----------------|----------------|------------------------------------|--------------------|-----------------|----------------|--------------------------------|--------------------------------------------|-----------------------------------------|--|
| 1 Which day of the week does this record represent? <b>A</b> |                 |                |                                    |                    |                 |                |                                |                                            |                                         |  |
| 2 Is this a typical day? YES =1, NO=0                        |                 |                |                                    |                    |                 |                | 13. If NO, please specify:     |                                            |                                         |  |
| 3                                                            | 4               | 5              | 6                                  | 7                  | 8               | 9              | 10                             | 11                                         | 12                                      |  |
| <b>Main Dish</b>                                             | <b>Quantity</b> | <b>Unit -D</b> | <b>How was the dish prepared-C</b> | <b>Ingredients</b> | <b>Quantity</b> | <b>Unit -D</b> | <b>Source of Ingredients B</b> | <b>No of People ate from the Main Dish</b> | <b>Where was the food consumed? - E</b> |  |
| <b>Breakfast</b>                                             |                 |                |                                    |                    |                 |                |                                |                                            |                                         |  |
|                                                              |                 |                |                                    |                    |                 |                |                                |                                            |                                         |  |
|                                                              |                 |                |                                    |                    |                 |                |                                |                                            |                                         |  |
|                                                              |                 |                |                                    |                    |                 |                |                                |                                            |                                         |  |
|                                                              |                 |                |                                    |                    |                 |                |                                |                                            |                                         |  |
|                                                              |                 |                |                                    |                    |                 |                |                                |                                            |                                         |  |
|                                                              |                 |                |                                    |                    |                 |                |                                |                                            |                                         |  |
|                                                              |                 |                |                                    |                    |                 |                |                                |                                            |                                         |  |
| <b>Snack</b>                                                 |                 |                |                                    |                    |                 |                |                                |                                            |                                         |  |
|                                                              |                 |                |                                    |                    |                 |                |                                |                                            |                                         |  |
|                                                              |                 |                |                                    |                    |                 |                |                                |                                            |                                         |  |
|                                                              |                 |                |                                    |                    |                 |                |                                |                                            |                                         |  |
| <b>Lunch</b>                                                 |                 |                |                                    |                    |                 |                |                                |                                            |                                         |  |
|                                                              |                 |                |                                    |                    |                 |                |                                |                                            |                                         |  |
|                                                              |                 |                |                                    |                    |                 |                |                                |                                            |                                         |  |
|                                                              |                 |                |                                    |                    |                 |                |                                |                                            |                                         |  |
|                                                              |                 |                |                                    |                    |                 |                |                                |                                            |                                         |  |
|                                                              |                 |                |                                    |                    |                 |                |                                |                                            |                                         |  |
|                                                              |                 |                |                                    |                    |                 |                |                                |                                            |                                         |  |
| <b>Snack</b>                                                 |                 |                |                                    |                    |                 |                |                                |                                            |                                         |  |
|                                                              |                 |                |                                    |                    |                 |                |                                |                                            |                                         |  |
|                                                              |                 |                |                                    |                    |                 |                |                                |                                            |                                         |  |
|                                                              |                 |                |                                    |                    |                 |                |                                |                                            |                                         |  |
| <b>Dinner</b>                                                |                 |                |                                    |                    |                 |                |                                |                                            |                                         |  |
|                                                              |                 |                |                                    |                    |                 |                |                                |                                            |                                         |  |
|                                                              |                 |                |                                    |                    |                 |                |                                |                                            |                                         |  |
|                                                              |                 |                |                                    |                    |                 |                |                                |                                            |                                         |  |
|                                                              |                 |                |                                    |                    |                 |                |                                |                                            |                                         |  |
|                                                              |                 |                |                                    |                    |                 |                |                                |                                            |                                         |  |
|                                                              |                 |                |                                    |                    |                 |                |                                |                                            |                                         |  |
|                                                              |                 |                |                                    |                    |                 |                |                                |                                            |                                         |  |
| <b>Snack</b>                                                 |                 |                |                                    |                    |                 |                |                                |                                            |                                         |  |
|                                                              |                 |                |                                    |                    |                 |                |                                |                                            |                                         |  |
|                                                              |                 |                |                                    |                    |                 |                |                                |                                            |                                         |  |
|                                                              |                 |                |                                    |                    |                 |                |                                |                                            |                                         |  |

|               |           |   |            |               |                |    |                |               |         |    |                |               |         |    |                      |
|---------------|-----------|---|------------|---------------|----------------|----|----------------|---------------|---------|----|----------------|---------------|---------|----|----------------------|
| <b>Code A</b> |           | 4 | Thursday   | <b>Code B</b> |                | 4  | Rain Water     | <b>Code C</b> |         | 5  | Cooked         | <b>Code E</b> |         | 5  | Market               |
| 1             | Monday    | 5 | Friday     | 1             | Own production | 5  | Spring Water   | 1             | Raw     | 6  | Fried          | 1             | Home    | 6  | School               |
| 2             | Tuesday   | 6 | Saturday   | 2             | Purchased      | 6  | Well           | 2             | Dried   | 7  | Roasted        | 2             | Hotel   | 7  | Ceremony             |
| 3             | Wednesday | 7 | Sunday     | 3             | Gift           | 7  | Borehole       | 3             | Boiled  | 8  | Processed      | 3             | Friend  | 77 | Other, specify _____ |
|               |           |   |            |               |                | 77 | Other, Specify | 4             | Steamed | 77 | Other, specify | 4             | Work    |    |                      |
| <b>Code D</b> |           | 3 | Tablespoon | 6             | Pinch          | 9  | Serving spoon  | 13            | Glass   | 21 | Slice          | 25            | Bowl    | 77 | Other, specify _____ |
| 1             | Small cup | 4 | Grams      | 7             | Ml             | 10 | Piece          | 16            | Bundle  | 23 | Cobs           | 26            | Handful |    |                      |
| 2             | Teaspoon  | 5 | Liter      | 8             | Pint (500ml)   | 12 | Cup            | 17            | Kg      | 24 | Plates         | 40            | Stick   |    |                      |

**MODULE 22: INDIVIDUAL PART**

Respondent MEMID \_\_\_\_\_

Name: \_\_\_\_\_

**MODULE 22/1- FIRST INDIVIDUAL QUESTIONNAIRE (1)**

*This section will be answered by one chosen individual of the household, e.g. individual which is mentioned in the information sheet.*

*This module will be asked at two different days. Additionally, we would like to measure the respondent (weight, height, hip and waist). Please tell the respondent the date of the second visit.*

*Please make sure that the same person on both days is answering the questionnaire.*

| <b>PART 3: INDIVIDUAL 1 - ANTHROPOMETRIC</b>                                                                                                                            |             |      |             |      |       |     |
|-------------------------------------------------------------------------------------------------------------------------------------------------------------------------|-------------|------|-------------|------|-------|-----|
| In this section we would like to take the height and weight of you. We will do this twice by two different enumerators to make sure to get the right weight and height. |             |      |             |      |       |     |
| 1                                                                                                                                                                       | 2           | 2a   | 3           | 3a   | 4     | 5   |
| Type of clothe<br>(light=0, heavy=1)                                                                                                                                    | Weight (kg) |      | Height (cm) |      | Waist | Hip |
|                                                                                                                                                                         | Data        | Data | Data        | Data | cm    | cm  |
|                                                                                                                                                                         |             |      |             |      |       |     |

**PART 1 First Individual Dietary Recall for YESTERDAY (1) (24hr DR) → Record Day \_\_\_\_\_**

**Respondent MEMID:** \_\_\_\_\_

Now we would like to know, which food and drinks and how much of it did you alone (*not* your household) consume yesterday. Please indicate food item, preparation and sourc. Write down all the foods, **drinks** and **fruits** mentioned. When mixed dishes are mentioned, ask for the list of ingredients. When the respondents has finished, probe for the meals and snacks not mentioned.

|                  |                                                     |               |                                    |                    |                            |               |                                |                                            |                                         |  |  |
|------------------|-----------------------------------------------------|---------------|------------------------------------|--------------------|----------------------------|---------------|--------------------------------|--------------------------------------------|-----------------------------------------|--|--|
| 1                | Which day of the week does this record represent? A |               |                                    |                    |                            |               |                                |                                            |                                         |  |  |
| 2                | Is this a typical day? YES =1, NO=0                 |               |                                    |                    | 13. If NO, please specify: |               |                                |                                            |                                         |  |  |
| 3                | 4                                                   | 5             | 6                                  | 7                  | 8                          | 9             | 10                             | 11                                         | 12                                      |  |  |
| <b>Main Dish</b> | <b>Quantity</b>                                     | <b>Unit-D</b> | <b>How was the dish prepared-C</b> | <b>Ingredients</b> | <b>Quantity</b>            | <b>Unit-D</b> | <b>Source of Ingredients B</b> | <b>No of People ate from the Main Dish</b> | <b>Where was the food consumed? - E</b> |  |  |
| <b>Breakfast</b> |                                                     |               |                                    |                    |                            |               |                                |                                            |                                         |  |  |
|                  |                                                     |               |                                    |                    |                            |               |                                |                                            |                                         |  |  |
|                  |                                                     |               |                                    |                    |                            |               |                                |                                            |                                         |  |  |
|                  |                                                     |               |                                    |                    |                            |               |                                |                                            |                                         |  |  |
|                  |                                                     |               |                                    |                    |                            |               |                                |                                            |                                         |  |  |
|                  |                                                     |               |                                    |                    |                            |               |                                |                                            |                                         |  |  |
|                  |                                                     |               |                                    |                    |                            |               |                                |                                            |                                         |  |  |
| <b>Snack</b>     |                                                     |               |                                    |                    |                            |               |                                |                                            |                                         |  |  |
|                  |                                                     |               |                                    |                    |                            |               |                                |                                            |                                         |  |  |
|                  |                                                     |               |                                    |                    |                            |               |                                |                                            |                                         |  |  |
|                  |                                                     |               |                                    |                    |                            |               |                                |                                            |                                         |  |  |
| <b>Lunch</b>     |                                                     |               |                                    |                    |                            |               |                                |                                            |                                         |  |  |
|                  |                                                     |               |                                    |                    |                            |               |                                |                                            |                                         |  |  |
|                  |                                                     |               |                                    |                    |                            |               |                                |                                            |                                         |  |  |
|                  |                                                     |               |                                    |                    |                            |               |                                |                                            |                                         |  |  |
|                  |                                                     |               |                                    |                    |                            |               |                                |                                            |                                         |  |  |
|                  |                                                     |               |                                    |                    |                            |               |                                |                                            |                                         |  |  |
|                  |                                                     |               |                                    |                    |                            |               |                                |                                            |                                         |  |  |
| <b>Snack</b>     |                                                     |               |                                    |                    |                            |               |                                |                                            |                                         |  |  |
|                  |                                                     |               |                                    |                    |                            |               |                                |                                            |                                         |  |  |
|                  |                                                     |               |                                    |                    |                            |               |                                |                                            |                                         |  |  |
|                  |                                                     |               |                                    |                    |                            |               |                                |                                            |                                         |  |  |
| <b>Dinner</b>    |                                                     |               |                                    |                    |                            |               |                                |                                            |                                         |  |  |
|                  |                                                     |               |                                    |                    |                            |               |                                |                                            |                                         |  |  |
|                  |                                                     |               |                                    |                    |                            |               |                                |                                            |                                         |  |  |
|                  |                                                     |               |                                    |                    |                            |               |                                |                                            |                                         |  |  |
|                  |                                                     |               |                                    |                    |                            |               |                                |                                            |                                         |  |  |
|                  |                                                     |               |                                    |                    |                            |               |                                |                                            |                                         |  |  |
| <b>Snack</b>     |                                                     |               |                                    |                    |                            |               |                                |                                            |                                         |  |  |
|                  |                                                     |               |                                    |                    |                            |               |                                |                                            |                                         |  |  |
|                  |                                                     |               |                                    |                    |                            |               |                                |                                            |                                         |  |  |
|                  |                                                     |               |                                    |                    |                            |               |                                |                                            |                                         |  |  |

|               |              |                  |                   |               |                   |               |                       |
|---------------|--------------|------------------|-------------------|---------------|-------------------|---------------|-----------------------|
| <b>Code A</b> | 4 Thursday   | <b>Code B</b>    | 4 Rain Water      | <b>Code C</b> | 5 Cooked          | <b>Code E</b> | 5 Market              |
| 1 Monday      | 5 Friday     | 1 Own production | 5 Spring Water    | 1 Raw         | 6 Fried           | 1 Home        | 6 School              |
| 2 Tuesday     | 6 Saturday   | 2 Purchased      | 6 Well            | 2 Dried       | 7 Roasted         | 2 Hotel       | 7 Ceremony            |
| 3 Wednesday   | 7 Sunday     | 3 Gift           | 7 Borehole        | 3 Boiled      | 8 Processed       | 3 Friend      | 77 Other, specify____ |
|               |              |                  | 77 Other, Specify | 4 Steamed     | 77 Other, specify | 4 Work        |                       |
| <b>Code D</b> | 3 Tablespoon | 6 Pinch          | 9 Serving spoon   | 13 Glass      | 21 Slice          | 25 Bowl       | 77 Other, specify____ |
| 1 Small cup   | 4 Grams      | 7 Ml             | 10 Piece          | 16 Bundle     | 23 Cobs           | 26 Handful    |                       |
| 2 Teaspoon    | 5 Liter      | 8 Pint (500ml)   | 12 Cup            | 17 Kg         | 24 Plates         | 40 Stick      |                       |



**Questionnaire number (adda\_hhid) \_\_\_\_\_**

**Code A**

|   |           |   |      |   |                   |   |               |   |           |    |     |
|---|-----------|---|------|---|-------------------|---|---------------|---|-----------|----|-----|
| 1 | very good | 2 | Good | 3 | not good/not poor | 4 | a little poor | 5 | very poor | 88 | DNK |
|---|-----------|---|------|---|-------------------|---|---------------|---|-----------|----|-----|

**Code B**

|    |        |    |                        |   |          |   |              |    |                 |  |  |
|----|--------|----|------------------------|---|----------|---|--------------|----|-----------------|--|--|
| 1  | Asthma | 3  | Cardiovascular disease | 4 | Diabetes | 5 | Hypertension | 77 | Other, specify_ |  |  |
| 88 | DNK    | 99 | None                   |   |          |   |              |    |                 |  |  |

**Code C**

|   |                    |   |              |    |                  |    |              |    |                   |    |                  |
|---|--------------------|---|--------------|----|------------------|----|--------------|----|-------------------|----|------------------|
| 1 | Bad teeth (ache)   | 5 | Eye problems | 9  | Headache         | 13 | Malaria      | 17 | Stomach ache      | 21 | Vomiting         |
| 2 | Cholera            | 6 | Fainting     | 10 | Hepatitis        | 14 | Measles      | 18 | Tetanus           | 22 | Weakness         |
| 3 | Diarrhea           | 7 | Fever        | 11 | High cholesterol | 15 | Pneumonia    | 19 | Tiredness/Fatigue | 77 | Other, specify__ |
| 4 | Ear/throat problem | 8 | Flu/Cold     | 12 | Intestinal worms | 16 | Skin Problem | 20 | Tuberculosis      | 99 | None             |

**Code D**

|   |                    |   |                    |   |                           |   |                               |    |                     |
|---|--------------------|---|--------------------|---|---------------------------|---|-------------------------------|----|---------------------|
| 1 | Fatigue, tiredness | 3 | Weak immune system | 5 | Reduction in intelligence | 7 | Soreness of the moth          | 77 | Other, specify_____ |
| 2 | Low concentration  | 4 | Shortage of blood  | 6 | Small stature             | 8 | Unusual quantity of hair loss | 88 | DNK                 |

**Code E**

|   |                        |   |                            |   |                                                              |   |       |    |                |
|---|------------------------|---|----------------------------|---|--------------------------------------------------------------|---|-------|----|----------------|
| 1 | Green leafy vegetables | 3 | Soybean/chick peas/lentils | 5 | Fish                                                         | 7 | Liver | 77 | Other, specify |
| 2 | Peas                   | 4 | Meat                       | 6 | orange/red coloured fruits & vegetables (eg, OFSP, tomatoes) |   |       | 88 | DNK            |

**Code F**

|    |                          |    |                 |   |         |   |          |   |       |
|----|--------------------------|----|-----------------|---|---------|---|----------|---|-------|
| 1  | leading to eye blindness | 2  | Night blindness | 3 | Measles | 4 | Diarrhea | 5 | Worms |
| 77 | Other, specify_          | 88 | DNK             |   |         |   |          |   |       |

**Code G**

|   |                            |   |                      |   |         |    |                 |
|---|----------------------------|---|----------------------|---|---------|----|-----------------|
| 1 | Green leafy vegetables     | 3 | Milk & milk products | 5 | Eggs    | 77 | Other, specify_ |
| 2 | Orange vegetables & fruits | 4 | Palm Oil             | 6 | Offal's | 88 | DNK             |

**Code H**

|   |        |   |           |   |      |    |               |     |      |  |
|---|--------|---|-----------|---|------|----|---------------|-----|------|--|
| 1 | Iodine | 3 | Vitamin A | 5 | Zinc | 77 | Other specify | 99  | None |  |
| 2 | Iron   | 4 | Vitamin C |   |      |    | 88            | DNK |      |  |

**Code J**

|   |              |   |         |   |                |   |      |    |          |    |                |
|---|--------------|---|---------|---|----------------|---|------|----|----------|----|----------------|
| 1 | <b>Beans</b> | 3 | Cheese  | 5 | Dairy products | 7 | Fish | 9  | Sardines | 77 | Other, specify |
| 2 | Beef         | 4 | Chicken | 6 | Eggs           | 8 | Milk | 10 | Yoghurt  | 88 | DNK            |

**Code K -**

|   |          |   |         |   |        |   |          |    |                |    |     |
|---|----------|---|---------|---|--------|---|----------|----|----------------|----|-----|
| 1 | Chapatti | 3 | Cassava | 5 | Crips  | 7 | Plantain | 9  | Ugali          | 88 | DNK |
| 2 | Bread    | 4 | Yam     | 6 | Potato | 8 | Rice     | 77 | Other, specify |    |     |

**Code L**

|   |            |   |       |   |          |    |                |
|---|------------|---|-------|---|----------|----|----------------|
| 1 | Butter     | 3 | Lard  | 5 | Oil      | 77 | Other, specify |
| 2 | Groundnuts | 4 | Kimbo | 6 | Palm Oil | 88 | DNK            |

**Code M**

|   |                            |   |                                      |   |                   |    |                         |    |               |  |
|---|----------------------------|---|--------------------------------------|---|-------------------|----|-------------------------|----|---------------|--|
| 1 | Radio                      | 4 | Doctor                               | 7 | Health centre     | 10 | School                  | 77 | Other Specify |  |
| 2 | TV                         | 5 | <b>Nutrition education (specify)</b> | 8 | Internet          | 11 | Community health worker | 88 | DNK           |  |
| 3 | <b>NGO (specify:_____)</b> | 6 | Newspaper                            | 9 | Friends/Relatives | 12 | Church                  |    |               |  |

**Code N**

|   |                         |   |          |    |                  |
|---|-------------------------|---|----------|----|------------------|
| 1 | Hypertension            | 3 | Diabetes | 5  | High cholesterol |
| 2 | Cardiovascular diseases | 4 | Cancer   | 77 | Others, specify  |

**Code O**

|   |            |   |            |   |              |   |          |    |                     |    |                |
|---|------------|---|------------|---|--------------|---|----------|----|---------------------|----|----------------|
| 1 | Respondent | 3 | House help | 5 | Sister       | 7 | Daughter | 9  | Respindent + Spouse | 77 | Other specify: |
| 2 | Spouse     | 4 | Brother    | 6 | Grandparents | 8 | Son      | 10 | Whole family        | 99 | N/A            |



**PART 2 First Individual: INDIVIDUAL KNOWLEDGE QUESTIONS - second visit (Day 2)**

**Respondent MEMID:** \_\_\_\_\_

|    |                                                                                                                                                                                     |                         |               |                                          |   |               |   |
|----|-------------------------------------------------------------------------------------------------------------------------------------------------------------------------------------|-------------------------|---------------|------------------------------------------|---|---------------|---|
| 1  | During the last 4 weeks how would you rate your health? <b>A</b>                                                                                                                    |                         |               |                                          |   |               |   |
| 2  | Do you suffer from any of the following diseases _____ <b>[Read out Code B]</b>                                                                                                     |                         |               |                                          |   |               |   |
| 3  | Have you suffered from any diseases or symptoms during the last 30 days?<br><i>Allow up to four answers C</i>                                                                       |                         |               | a                                        | b | c             | d |
|    |                                                                                                                                                                                     |                         |               |                                          |   |               |   |
| 4  | Can you name anything that helps prevent you and other family members from getting diarrhea? Yes=1, No=0,<br><i>If No, skip to question 5</i> _____.                                |                         |               |                                          |   |               |   |
|    | If yes, let respondent specify and tick the ones that apply underneath – <i>do not read out the list, probe for further responses – more than one answer possible</i>               |                         |               |                                          |   |               |   |
|    | a                                                                                                                                                                                   | Washing hands           | c             | Exclusive breast feeding                 | e | Other specify |   |
|    | b                                                                                                                                                                                   | Use latrine/ bury faces | d             | Protect food & water supplies with cover |   |               |   |
| 5  | Which diseases or problems are caused by deficiency in iron?(allow up to3 answers- <b>Do not prompt</b> ) <b>D</b>                                                                  |                         |               | a                                        | b | c             |   |
| 6  | Do you know which foods have ample amounts of iron? (allow up to3 answers – <b>Do not prompt</b> ) <b>E</b>                                                                         |                         |               | a                                        | b | c             |   |
| 7  | Which diseases or problems are caused by deficiency in vitamin A? (allow up to3 answers – <b>Do not prompt</b> ) <b>F</b>                                                           |                         |               | a                                        | b | c             |   |
| 8  | Do you know which foods have ample amounts of vitamin A? (allow up to3 answers – <b>Do not prompt</b> ) <b>G</b>                                                                    |                         |               | a                                        | b | c             |   |
| 10 | Did [NAME] receive any nutritious supplements in the last year (Oct 15 – Sept 16)?<br><i>Multiple answer possible, allow up to 3 answers H</i>                                      |                         |               | a                                        | b | c             |   |
|    |                                                                                                                                                                                     |                         |               |                                          |   |               |   |
| 11 | Who do you think is the most informed person within your household concerning nutrition information?                                                                                |                         |               | <b>ENTER MEMID</b>                       |   |               |   |
| 12 | Who do you think is the most informed person within your household concerning agricultural information?                                                                             |                         |               | <b>ENTER MEMID</b>                       |   |               |   |
| 13 | Have you heard of the following macronutrients:<br><i>No=0, Yes=1; If no, please go to question 24</i>                                                                              |                         | a Protein     | b Carbohydrates                          |   | c Fat         |   |
| 14 | If yes, to question 20, please name which food items can supply those macronutrients:<br><i>(allow up to three answers)</i>                                                         |                         |               | a                                        | b | c             |   |
|    |                                                                                                                                                                                     |                         | Protein       | <b>J</b>                                 |   |               |   |
|    |                                                                                                                                                                                     |                         | Carbohydrates | <b>K</b>                                 |   |               |   |
|    |                                                                                                                                                                                     |                         | Fat           | <b>L</b>                                 |   |               |   |
| 15 |                                                                                                                                                                                     |                         |               |                                          |   |               |   |
| 16 |                                                                                                                                                                                     |                         |               |                                          |   |               |   |
| 19 | During the last year (Oct. 2015 - Sept 2016), have you noticed or received information/training about healthy eating or healthy diets? <i>No=0, Yes=1 (If NO, skip to next M23)</i> |                         |               |                                          |   |               |   |
| 20 | If yes, where did you find, see or get this information on healthy eating/diet? <b>M</b>                                                                                            |                         |               |                                          |   |               |   |
| 21 | Are you aware of any health problems or diseases that are associated with excess weight? <i>Yes = 1 No = 0 Don't know = 88</i>                                                      |                         |               |                                          |   |               |   |
| 22 | Which diseases do you think are associated with excess weight? (Allow up to three responses. Rank according to likelihood) <b>N</b>                                                 |                         |               | 1                                        | 2 | 3             |   |
|    |                                                                                                                                                                                     |                         |               |                                          |   |               |   |

**Modul 23/1: Decision making**

|    |                                                                                                                               | <b>Code O</b> | Fill in MEMID |
|----|-------------------------------------------------------------------------------------------------------------------------------|---------------|---------------|
| 1  | Who decides how the household finances should be allocated?                                                                   |               |               |
| 2  | Who manages the household finances and implements the decision?                                                               |               |               |
| 3  | Who makes the decision <b>which</b> food is purchased in the household?                                                       |               |               |
| 4  | If not the respondent, please ask if the respondent would prefer other food to be purchased. YES=1, NO=0                      |               |               |
| 5  | Who makes the decision <b>where</b> food is purchased in the household?                                                       |               |               |
| 6  | If not the respondent, please ask if the respondent would prefer that the food would be purchased somewhere else? YES=1, NO=0 |               |               |
| 7  | Who decides which and how much food is consumed from your own produce?                                                        |               |               |
| 8  | Who is responsible to purchases food on a daily basis?                                                                        |               |               |
| 9  | Who makes the decision which food is prepared in the household?                                                               |               |               |
| 10 | Who is responsible for daily food preparation in the household?                                                               |               |               |
| 11 | Who makes decisions on expenditure on cheap household assets?                                                                 |               |               |
| 12 | Who males decisions on expenditure on expensive household assets?                                                             |               |               |
| 13 | Who makes decisions on medical expenditures?                                                                                  |               |               |
| 14 | Who makes decisions on education?                                                                                             |               |               |
| 15 | Who decides to participate in agricultural training sessions?                                                                 |               |               |

**Module 22: Individual Part**

**Respondent MEMID** \_\_\_\_\_

**Name:** \_\_\_\_\_

**MODULE 22/2- SECOND INDIVIDUAL QUESTIONNAIRE (2)**

*This section will be answered by one chosen individual of the household, e.g. the second individual on the information sheet given.*

*This module will be asked at two different days. At the first visit one 24-hour dietary recall will be asked. On the second visit a second 24 hour dietary recall and nutrition/health knowledge questions will be asked. Additionally, we would like to measure the respondent (weight, height, hip and waist). Please make an appointment with the respondent to come back after at least two days. Please make sure that the same person on both days is answering the questionnaire.*

| <b>PART 3: INDIVIDUAL 2 ANTHROPOMETRIC</b>                                                                                                                           |             |      |             |      |       |     |
|----------------------------------------------------------------------------------------------------------------------------------------------------------------------|-------------|------|-------------|------|-------|-----|
| In this section we would like to take the height, weight of you. We will do this twice by two different enumerators to make sure to get the right weight and height. |             |      |             |      |       |     |
| 1                                                                                                                                                                    | 2           | 2a   | 3           | 3a   | 4     | 5   |
| Type of clothe<br>(light=0, heavy=1)                                                                                                                                 | Weight (kg) |      | Height (cm) |      | Waist | Hip |
|                                                                                                                                                                      | Data        | Data | Data        | Data | cm    | cm  |
|                                                                                                                                                                      |             |      |             |      |       |     |



Second visit (Day 2) PART 2 Second Individual: Dietary Recall for YESTERDAY (2) (24hr DR)

Record Day \_\_\_\_\_

Respondent MEMID: \_\_\_\_\_

Now we would like to know, which food and drinks and how much of it did you alone (not your household) consume yesterday. Please indicate food item, preparation and sourc. Write down all the foods, drinks and fruits mentioned. When mixed dishes are mentioned, ask for the list of ingredients. When the respondents has finished, probe for the meals and snacks not mentioned.

| 1                | Which day of the week does this record represent? A |         |                             |             |          |                            |                         |                                   |                                  |  |
|------------------|-----------------------------------------------------|---------|-----------------------------|-------------|----------|----------------------------|-------------------------|-----------------------------------|----------------------------------|--|
| 2                | Is this a typical day? YES =1, NO=0                 |         |                             |             |          | 13. If NO, please specify: |                         |                                   |                                  |  |
| 3                | 4                                                   | 5       | 6                           | 7           | 8        | 9                          | 10                      | 11                                | 12                               |  |
| Main Dish        | Quantity                                            | Unit -D | How was the dish prepared-C | Ingredients | Quantity | Unit -D                    | Source of Ingredients B | Nb of People eaten from Main Dish | Where was the food consumed? - E |  |
| <b>Breakfast</b> |                                                     |         |                             |             |          |                            |                         |                                   |                                  |  |
|                  |                                                     |         |                             |             |          |                            |                         |                                   |                                  |  |
|                  |                                                     |         |                             |             |          |                            |                         |                                   |                                  |  |
|                  |                                                     |         |                             |             |          |                            |                         |                                   |                                  |  |
|                  |                                                     |         |                             |             |          |                            |                         |                                   |                                  |  |
|                  |                                                     |         |                             |             |          |                            |                         |                                   |                                  |  |
|                  |                                                     |         |                             |             |          |                            |                         |                                   |                                  |  |
|                  |                                                     |         |                             |             |          |                            |                         |                                   |                                  |  |
| <b>Snack</b>     |                                                     |         |                             |             |          |                            |                         |                                   |                                  |  |
|                  |                                                     |         |                             |             |          |                            |                         |                                   |                                  |  |
|                  |                                                     |         |                             |             |          |                            |                         |                                   |                                  |  |
|                  |                                                     |         |                             |             |          |                            |                         |                                   |                                  |  |
| <b>Lunch</b>     |                                                     |         |                             |             |          |                            |                         |                                   |                                  |  |
|                  |                                                     |         |                             |             |          |                            |                         |                                   |                                  |  |
|                  |                                                     |         |                             |             |          |                            |                         |                                   |                                  |  |
|                  |                                                     |         |                             |             |          |                            |                         |                                   |                                  |  |
|                  |                                                     |         |                             |             |          |                            |                         |                                   |                                  |  |
|                  |                                                     |         |                             |             |          |                            |                         |                                   |                                  |  |
|                  |                                                     |         |                             |             |          |                            |                         |                                   |                                  |  |
|                  |                                                     |         |                             |             |          |                            |                         |                                   |                                  |  |
| <b>Snack</b>     |                                                     |         |                             |             |          |                            |                         |                                   |                                  |  |
|                  |                                                     |         |                             |             |          |                            |                         |                                   |                                  |  |
|                  |                                                     |         |                             |             |          |                            |                         |                                   |                                  |  |
|                  |                                                     |         |                             |             |          |                            |                         |                                   |                                  |  |
| <b>Dinner</b>    |                                                     |         |                             |             |          |                            |                         |                                   |                                  |  |
|                  |                                                     |         |                             |             |          |                            |                         |                                   |                                  |  |
|                  |                                                     |         |                             |             |          |                            |                         |                                   |                                  |  |
|                  |                                                     |         |                             |             |          |                            |                         |                                   |                                  |  |
|                  |                                                     |         |                             |             |          |                            |                         |                                   |                                  |  |
|                  |                                                     |         |                             |             |          |                            |                         |                                   |                                  |  |
|                  |                                                     |         |                             |             |          |                            |                         |                                   |                                  |  |
| <b>Snack</b>     |                                                     |         |                             |             |          |                            |                         |                                   |                                  |  |
|                  |                                                     |         |                             |             |          |                            |                         |                                   |                                  |  |
|                  |                                                     |         |                             |             |          |                            |                         |                                   |                                  |  |
|                  |                                                     |         |                             |             |          |                            |                         |                                   |                                  |  |

|               |              |                   |                   |               |                   |               |                   |
|---------------|--------------|-------------------|-------------------|---------------|-------------------|---------------|-------------------|
| <b>Code A</b> | 4 Thursday   | <b>Code B</b>     | 4 Rain Water      | <b>Code C</b> | 5 Cooked          | <b>Code E</b> | 5 Market          |
| 1 Monday      | 5 Friday     | 1 Own production  | 5 Spring Water    | 1 Raw         | 6 Fried           | 1 Home        | 6 School          |
| 2 Tuesday     | 6 Saturday   | 2 Purchased       | 6 Well            | 2 Dried       | 7 Roasted         | 2 Hotel       | 7 Ceremony        |
| 3 Wednesday   | 7 Sunday     | 3 Gift            | 7 Borehole        | 3 Boiled      | 8 Processed       | 3 Friend      | 77 Other, specify |
|               |              | 77 Other, Specify | 77 Other, Specify | 4 Steamed     | 77 Other, specify | 4 Work        |                   |
| <b>Code D</b> | 3 Tablespoon | 6 Pinch           | 9 Serving spoon   | 13 Glass      | 21 Slice          | 25 Bowl       | 77 Other, specify |
| 1 Small cup   | 4 Grams      | 7 MI              | 10 Piece          | 16 Bundle     | 23 Cobs           | 26 Handful    |                   |
| 2 Teaspoon    | 5 Liter      | 8 Pint (500ml)    | 12 Cup            | 17 Kg         | 24 Plates         | 40 Stick      |                   |

Questionnaire number (adda\_hhid) \_\_\_\_\_

**Questionnaire number (adda\_hhid) \_\_\_\_\_**

**Code A**

|   |           |   |      |   |                   |   |               |   |           |    |     |
|---|-----------|---|------|---|-------------------|---|---------------|---|-----------|----|-----|
| 1 | very good | 2 | Good | 3 | not good/not poor | 4 | a little poor | 5 | very poor | 88 | DNK |
|---|-----------|---|------|---|-------------------|---|---------------|---|-----------|----|-----|

**Code B**

|    |        |    |                        |   |          |   |              |    |                 |  |  |
|----|--------|----|------------------------|---|----------|---|--------------|----|-----------------|--|--|
| 1  | Asthma | 3  | Cardiovascular disease | 4 | Diabetes | 5 | Hypertension | 77 | Other, specify_ |  |  |
| 88 | DNK    | 99 | None                   |   |          |   |              |    |                 |  |  |

**Code C**

|   |                    |   |              |    |                  |    |              |    |                   |    |                  |
|---|--------------------|---|--------------|----|------------------|----|--------------|----|-------------------|----|------------------|
| 1 | Bad teeth (ache)   | 5 | Eye problems | 9  | Headache         | 13 | Malaria      | 17 | Stomach ache      | 21 | Vomiting         |
| 2 | Cholera            | 6 | Fainting     | 10 | Hepatitis        | 14 | Measles      | 18 | Tetanus           | 22 | Weakness         |
| 3 | Diarrhea           | 7 | Fever        | 11 | High cholesterol | 15 | Pneumonia    | 19 | Tiredness/Fatigue | 77 | Other, specify__ |
| 4 | Ear/throat problem | 8 | Flu/Cold     | 12 | Intestinal worms | 16 | Skin Problem | 20 | Tuberculosis      | 99 | None             |

**Code D**

|   |                    |   |                    |   |                           |   |                               |    |                     |
|---|--------------------|---|--------------------|---|---------------------------|---|-------------------------------|----|---------------------|
| 1 | Fatigue, tiredness | 3 | Weak immune system | 5 | Reduction in intelligence | 7 | Soreness of the moth          | 77 | Other, specify_____ |
| 2 | Low concentration  | 4 | Shortage of blood  | 6 | Small stature             | 8 | Unusual quantity of hair loss | 88 | DNK                 |

**Code E**

|   |                        |   |                            |   |                                                               |   |       |    |                |
|---|------------------------|---|----------------------------|---|---------------------------------------------------------------|---|-------|----|----------------|
| 1 | Green leafy vegetables | 3 | Soybean/chick peas/lentils | 5 | Fish                                                          | 7 | Liver | 77 | Other, specify |
| 2 | Peas                   | 4 | Meat                       | 6 | orange/red coloured fruits & vegetables (eg., OFSP, tomatoes) |   |       | 88 | DNK            |

**Code F**

|    |                          |    |                 |   |         |   |          |   |       |  |
|----|--------------------------|----|-----------------|---|---------|---|----------|---|-------|--|
| 1  | leading to eye blindness | 2  | Night blindness | 3 | Measles | 4 | Diarrhea | 5 | Worms |  |
| 77 | Other, specify_          | 88 | DNK             |   |         |   |          |   |       |  |

**Code G**

|   |                            |   |                      |   |         |    |                 |
|---|----------------------------|---|----------------------|---|---------|----|-----------------|
| 1 | Green leafy vegetables     | 3 | Milk & milk products | 5 | Eggs    | 77 | Other, specify_ |
| 2 | Orange vegetables & fruits | 4 | Palm Oil             | 6 | Offal's | 88 | DNK             |

**Code H**

|   |        |   |           |   |      |    |               |    |      |
|---|--------|---|-----------|---|------|----|---------------|----|------|
| 1 | Iodine | 3 | Vitamin A | 5 | Zinc | 77 | Other specify | 99 | None |
| 2 | Iron   | 4 | Vitamin C |   |      | 88 | DNK           |    |      |

**Code J**

|   |              |   |         |   |                |   |      |    |          |    |                |
|---|--------------|---|---------|---|----------------|---|------|----|----------|----|----------------|
| 1 | <b>Beans</b> | 3 | Cheese  | 5 | Dairy products | 7 | Fish | 9  | Sardines | 77 | Other, specify |
| 2 | Beef         | 4 | Chicken | 6 | Eggs           | 8 | Milk | 10 | Yoghurt  | 88 | DNK            |

**Code K -**

|   |          |   |         |   |        |   |          |    |                |    |     |
|---|----------|---|---------|---|--------|---|----------|----|----------------|----|-----|
| 1 | Chapatti | 3 | Cassava | 5 | Crips  | 7 | Plantain | 9  | Ugali          | 88 | DNK |
| 2 | Bread    | 4 | Yam     | 6 | Potato | 8 | Rice     | 77 | Other, specify |    |     |

**Code L**

|   |            |   |       |   |          |    |                |
|---|------------|---|-------|---|----------|----|----------------|
| 1 | Butter     | 3 | Lard  | 5 | Oil      | 77 | Other, specify |
| 2 | Groundnuts | 4 | Kimbo | 6 | Palm Oil | 88 | DNK            |

**Code M**

|   |                            |   |                                      |   |                   |    |                         |    |               |  |
|---|----------------------------|---|--------------------------------------|---|-------------------|----|-------------------------|----|---------------|--|
| 1 | Radio                      | 4 | Doctor                               | 7 | Health centre     | 10 | School                  | 77 | Other Specify |  |
| 2 | TV                         | 5 | <b>Nutrition education (specify)</b> | 8 | Internet          | 11 | Community health worker | 88 | DNK           |  |
| 3 | <b>NGO (specify:_____)</b> | 6 | Newspaper                            | 9 | Friends/Relatives | 12 | Church                  |    |               |  |

**Code N**

|   |                         |   |          |    |                  |
|---|-------------------------|---|----------|----|------------------|
| 1 | Hypertension            | 3 | Diabetes | 5  | High cholesterol |
| 2 | Cardiovascular diseases | 4 | Cancer   | 77 | Others, specify  |

**Code O**

|   |            |   |            |   |              |   |          |    |                     |    |                |
|---|------------|---|------------|---|--------------|---|----------|----|---------------------|----|----------------|
| 1 | Respondent | 3 | House help | 5 | Sister       | 7 | Daughter | 9  | Respondent + Spouse | 77 | Other specify: |
| 2 | Spouse     | 4 | Brother    | 6 | Grandparents | 8 | Son      | 10 | Whole family        | 99 | N/A            |

**PART 2 Second Individual: INDIVIDUAL KNOWLEDGE QUESTIONS - second visit (Day 2)**

**Respondent MEMID:** \_\_\_\_\_

|    |                                                                                                                                                                                     |                         |               |                                          |
|----|-------------------------------------------------------------------------------------------------------------------------------------------------------------------------------------|-------------------------|---------------|------------------------------------------|
| 1  | During the last 4 weeks how would you rate your health? <b>A</b>                                                                                                                    |                         |               |                                          |
| 2  | Do you suffer from any of the following diseases _____ [Read out Code B]                                                                                                            |                         |               |                                          |
| 3  | Have you suffered from any diseases or symptoms during the last 30 days?<br><i>Allow up to four answers C</i>                                                                       |                         |               | a                                        |
|    |                                                                                                                                                                                     |                         |               | b                                        |
| 4  | Can you name anything that helps prevent you and other family members from getting diarrhea? Yes=1, No=0,<br><b>If No, skip to question 5</b> _____.                                |                         |               | c                                        |
|    | If yes, let respondent specify and tick the ones that apply underneath – <i>do not read out the list, probe for further responses – more than one answer possible</i>               |                         |               | d                                        |
|    | a                                                                                                                                                                                   | Washing hands           | c             | Exclusive breast feeding                 |
|    | b                                                                                                                                                                                   | Use latrine/ bury faces | d             | Protect food & water supplies with cover |
|    | e                                                                                                                                                                                   | Other specify           |               |                                          |
| 5  | Which diseases or problems are caused by deficiency in iron?(allow up to3 answers- <b>Do not prompt</b> ) <b>D</b>                                                                  |                         |               | a                                        |
| 6  | Do you know which foods have ample amounts of iron? (allow up to3 answers – <b>Do not prompt</b> ) <b>E</b>                                                                         |                         |               | b                                        |
| 7  | Which diseases or problems are caused by deficiency in vitamin A? (allow up to3 answers – <b>Do not prompt</b> ) <b>F</b>                                                           |                         |               | c                                        |
| 8  | Do you know which foods have ample amounts of vitamin A? (allow up to3 answers – <b>Do not prompt</b> ) <b>G</b>                                                                    |                         |               | a                                        |
| 10 | Did [NAME] receive any nutritious supplements in the last year (Oct 15 – Sept 16)?<br><i>Multiple answer possible, allow up to 3 answers H</i>                                      |                         |               | b                                        |
|    |                                                                                                                                                                                     |                         |               | c                                        |
| 11 | Who do you think is the most informed person within your household concerning nutrition information? <b>ENTER MEMID</b>                                                             |                         |               |                                          |
| 12 | Who do you think is the most informed person within your household concerning agricultural information? <b>ENTER MEMID</b>                                                          |                         |               |                                          |
| 13 | Have you heard of the following macronutrients:<br><i>No=0, Yes=1; If no, please go to question 24</i>                                                                              |                         | a Protein     | b Carbohydrates                          |
| 14 | If yes, to question 20, please name which food items can supply those macronutrients:<br><i>(allow up to three answers)</i>                                                         |                         | c Fat         |                                          |
|    |                                                                                                                                                                                     |                         | a             | b                                        |
| 15 |                                                                                                                                                                                     |                         | Protein       | <b>J</b>                                 |
| 16 |                                                                                                                                                                                     |                         | Carbohydrates | <b>K</b>                                 |
|    |                                                                                                                                                                                     |                         | Fat           | <b>L</b>                                 |
| 19 | During the last year (Oct. 2015 - Sept 2016), have you noticed or received information/training about healthy eating or healthy diets? <i>No=0, Yes=1 (If NO, skip to next M23)</i> |                         |               |                                          |
| 20 | If yes, where did you find, see or get this information on healthy eating/diet? <b>M</b>                                                                                            |                         |               |                                          |
| 21 | Are you aware of any health problems or diseases that are associated with excess weight? <i>Yes = 1 No = 0 Don't know = 88</i>                                                      |                         |               |                                          |
| 22 | Which diseases do you think are associated with excess weight? (Allow up to three responses. Rank according to likelihood) <b>N</b>                                                 |                         |               | 1                                        |
|    |                                                                                                                                                                                     |                         |               | 2                                        |
|    |                                                                                                                                                                                     |                         |               | 3                                        |

**Modul 23/1: Decision making**

|    |                                                                                                                                      | Code O | Fill in MEMID |
|----|--------------------------------------------------------------------------------------------------------------------------------------|--------|---------------|
| 1  | Who decides how the household finances should be allocated?                                                                          |        |               |
| 2  | Who manages the household finances and implements the decision?                                                                      |        |               |
| 3  | Who makes the decision <b>which</b> food is purchased in the household?                                                              |        |               |
| 4  | If not the respondent, please ask if the respondent would prefer other food to be purchased. <i>YES=1, NO=0</i>                      |        |               |
| 5  | Who makes the decision <b>where</b> food is purchased in the household?                                                              |        |               |
| 6  | If not the respondent, please ask if the respondent would prefer that the food would be purchased somewhere else? <i>YES=1, NO=0</i> |        |               |
| 7  | Who decides which and how much food is consumed from your own produce?                                                               |        |               |
| 8  | Who is responsible to purchases food on a daily basis?                                                                               |        |               |
| 9  | Who makes the decision which food is prepared in the household?                                                                      |        |               |
| 10 | Who is responsible for daily food preparation in the household?                                                                      |        |               |
| 11 | Who makes decisions on expenditure on cheap household assets?                                                                        |        |               |
| 12 | Who makes decision on expenditure on expensive household assets?                                                                     |        |               |
| 13 | Who makes decisions on medical expenditures?                                                                                         |        |               |
| 14 | Who makes decisions on education?                                                                                                    |        |               |
| 15 | Who decides to participate in agricultural training sessions?                                                                        |        |               |
