# Supplementary material for: Various forms of double burden of malnutrition problems exist in rural Kenya
Source: Springer Nature journal article supplement (doi:10.1186/s12889-019-7882-y), 2019-11-21
Supplement: MOESM2 [file 12889_2019_7882_MOESM2_ESM.pdf]

## Additional Material A2

**Table A2** Estimated average requirements (EAR) for micronutrients

| Gender | Age    | Iron (mg/d) | Zinc (mg/d) | Vitamin A ( $\mu\text{g/d}$ ) |
|--------|--------|-------------|-------------|-------------------------------|
| Male   | 19-30y | 7.7         | 9.4         | 630                           |
|        | 31-50y | 6.0         | 9.4         | 625                           |
|        | 51-70y | 6.0         | 9.4         | 625                           |
|        | >70y   | 6.0         | 9.4         | 625                           |
| Female | 14-18y | 7.9         | 7.3         | 485                           |
|        | 19-30y | 8.1         | 6.8         | 500                           |
|        | 31-50y | 8.1         | 6.8         | 500                           |
|        | 51-70y | 5.0         | 6.8         | 500                           |
|        | >70y   | 5.0         | 6.8         | 500                           |
| Child  | 6-12 m | 6.9         | 2.5         | 210                           |
|        | 1-3y   | 3.0         | 2.5         | 210                           |
|        | 4-8y   | 4.1         | 4.0         | 275                           |

y, year; m, month

Source: IOM (2006).
