# Supplementary material for: Various forms of double burden of malnutrition problems exist in rural Kenya
Source: Springer Nature journal article supplement (doi:10.1186/s12889-019-7882-y), 2019-11-21
Supplement: MOESM3 [file 12889_2019_7882_MOESM3_ESM.pdf]

### Additional Material A3

**Table A3** Nutritional status of adults and children in the sample

| <b>Adults</b>                       | Total (n=874) |      | Female (n=558) |      | Male (n=316) |      |
|-------------------------------------|---------------|------|----------------|------|--------------|------|
|                                     | n             | %    | n              | %    | n            | %    |
| Underweight (BMI < 18.5)            | 43            | 4.9  | 21             | 3.8  | 22           | 7.0  |
| Normal weight (BMI 18.5 – 24.9)     | 426           | 48.7 | 239            | 42.8 | 187          | 59.2 |
| Overweight/obese (BMI ≥ 25.0)       | 405           | 46.3 | 298            | 53.4 | 107          | 33.9 |
| Overweight (BMI ≥ 25.0 and < 30.0)  | 265           | 30.3 | 182            | 32.6 | 83           | 26.3 |
| Obese (BMI ≥ 30.0)                  | 140           | 16.0 | 116            | 20.8 | 24           | 7.6  |
| <b>Children</b>                     | Total (n=184) |      | Female (n=89)  |      | Male (n=95)  |      |
| Severe underweight (BAZ < -3 SD)    | 1             | 0.5  | 0              |      | 1            | 0.5  |
| Severe underweight (WAZ < -3 SD)    | 2             | 1.1  | 0              |      | 2            | 2.1  |
| Severe stunting (HAZ < -3 SD)       | 16            | 8.7  | 7              | 7.4  | 9            | 10.1 |
| Severe wasting (WHZ < -3SD)         | 1             | 0.5  | 0              |      | 1            | 0.5  |
| Underweight (BAZ < -2 SD)           | 2             | 1.1  | 1              | 1.1  | 1            | 1.1  |
| Underweight (WAZ < -2 SD)           | 12            | 6.5  | 6              | 6.7  | 6            | 6.3  |
| Stunting (HAZ < -2 SD)              | 42            | 22.8 | 19             | 21.4 | 23           | 24.2 |
| Wasting (WHZ < -2 SD)               | 2             | 1.1  | 1              | 1.1  | 1            | 1.1  |
| Mild Underweight (BAZ < -1 SD)      | 13            | 7.1  | 6              | 6.7  | 7            | 7.4  |
| Mild Underweight (WAZ < -1 DS)      | 51            | 27.7 | 24             | 27.0 | 27           | 28.4 |
| Mild stunting (HAZ < -1 DS)         | 93            | 50.5 | 39             | 43.8 | 54           | 65.8 |
| Mild wasting (WHZ < -1 DS)          | 14            | 7.6  | 5              | 5.6  | 9            | 9.5  |
| At risk of overweight (BAZ > +1 SD) | 51            | 27.7 | 25             | 28.1 | 26           | 27.4 |
| At risk of overweight (WHZ > +1 SD) | 41            | 22.3 | 21             | 23.6 | 20           | 21.1 |
| Overweight (BAZ > +2 SD)            | 6             | 3.3  | 1              | 1.1  | 5            | 5.3  |
| Overweight (WHZ > +2 SD)            | 6             | 3.3  | 1              | 1.1  | 5            | 5.3  |

n, sample size; BMI, body mass index; BAZ, body mass index-for-age Z-score; SD, standard deviation; WAZ, weight-for-height Z-score; HAZ, height-for-age Z-score; WHZ, weight-for-height Z-score
