# Supplementary material for: Various forms of double burden of malnutrition problems exist in rural Kenya
Source: Springer Nature journal article supplement (doi:10.1186/s12889-019-7882-y), 2019-11-21
Supplement: MOESM4 [file 12889_2019_7882_MOESM4_ESM.pdf]

## Additional Material A4

**Table A4** Prevalence of micronutrient deficiencies in adults and children

|                 | Micronutrient deficiency |      | VA deficiency |      | Zinc deficiency |      | Iron deficiency |      |
|-----------------|--------------------------|------|---------------|------|-----------------|------|-----------------|------|
|                 | n                        | %    | n             | %    | n               | %    | n               | %    |
| <b>Adults</b>   |                          |      |               |      |                 |      |                 |      |
| Total (n=874)   | 361                      | 41.3 | 97            | 11.1 | 313             | 35.8 | 16              | 1.8  |
| Female (n=558)  | 185                      | 33.2 | 50            | 9.0  | 158             | 28.3 | 14              | 2.5  |
| Male (n=316)    | 176                      | 55.7 | 47            | 14.9 | 155             | 49.1 | 2               | 0.6  |
| <b>Children</b> |                          |      |               |      |                 |      |                 |      |
| Total (n=184)   | 56                       | 30.4 | 15            | 8.2  | 47              | 25.5 | 17              | 9.3  |
| Female (n=89)   | 28                       | 31.5 | 10            | 11.2 | 19              | 21.4 | 5               | 5.8  |
| Male (n=95)     | 28                       | 29.5 | 5             | 5.3  | 28              | 29.5 | 12              | 12.6 |

VA, vitamin A; n, sample size
