# Supplementary material for: Various forms of double burden of malnutrition problems exist in rural Kenya
Source: Springer Nature journal article supplement (doi:10.1186/s12889-019-7882-y), 2019-11-21
Supplement: MOESM5 [file 12889_2019_7882_MOESM5_ESM.pdf]

## Additional Material A5

**Table A5** Characteristics of adults, female and male, with and without individual-level DB

|                                     | Total adults        |                         |                      | Female adults           |                     | Male adults             |                     |
|-------------------------------------|---------------------|-------------------------|----------------------|-------------------------|---------------------|-------------------------|---------------------|
|                                     | Total<br>(n=874)    | Without DB 1<br>(n=710) | With DB 1<br>(n=164) | Without DB<br>1 (n=459) | With DB 1<br>(n=99) | Without DB 1<br>(n=251) | With DB 1<br>(n=65) |
| Individual age (years)              | 46.2 (12.9)         | 45.6 (13.0)             | 48.5*** (12.56)      | 43.5 (12.8)             | 44.4 (11.8)         | 49.4 (12.5)             | 54.8*** (11.1)      |
| Individual education (years)        | 8.7 (3.5)           | 8.7 (3.6)               | 8.5 (3.4)            | 8.4 (3.6)               | 8.0 (3.1)           | 9.3 (3.4)               | 9.4 (3.5)           |
| Kisii county (1/0)                  | 0.7 (0.5)           | 0.7 (0.5)               | 0.8*** (0.4)         | 0.7 (0.5)               | 0.7 (0.4)           | 0.7 (0.5)               | 0.9*** (0.3)        |
| Male household head (1/0)           | 0.8 (0.4)           | 0.8 (0.4)               | 0.8 (0.4)            | 0.8 (0.4)               | 0.7 (0.4)           | 1.0 (0.1)               | 1.0 (0.0)           |
| Age of household head<br>(years)    | 50.6 (12.3)         | 50.1 (12.6)             | 52.7** (11.0)        | 50.2 (12.5)             | 51.1 (10.8)         | 50.0 (12.8)             | 55.0*** (11.1)      |
| Farming occupation of head<br>(1/0) | 0.6 (0.5)           | 0.6 (0.5)               | 0.6 (0.5)            | 0.6 (0.5)               | 0.7 (0.5)           | 0.7 (0.5)               | 0.7 (0.5)           |
| Education of head (years)           | 9.1 (3.9)           | 9.0 (4.0)               | 9.1 (3.6)            | 8.9 (4.3)               | 9.0 (3.6)           | 9.3 (3.4)               | 9.4 (3.5)           |
| Number adults (count)               | 3.5 (1.5)           | 3.4 (1.5)               | 3.7** (1.5)          | 3.3 (1.5)               | 3.6* (1.5)          | 3.5 (1.5)               | 3.8* (1.5)          |
| Number children (count)             | 1.6 (1.3)           | 1.7 (1.3)               | 1.5* (1.4)           | 1.7 (1.3)               | 1.6 (1.4)           | 1.6 (1.3)               | 1.3 (1.3)           |
| Income per capita in PPP<br>\$/year | 4164.2<br>(12911.8) | 4256.3<br>(14169.7)     | 3767.0 (4457.0)      | 4414.0<br>(17279.2)     | 3241.7<br>(3491.7)  | 3971.2<br>(4941.2)      | 4571.4<br>(5559.5)  |
| Poverty rate (1/0)                  | 0.2 (0.4)           | 0.2 (0.4)               | 0.2 (0.4)            | 0.2 (0.4)               | 0.2 (0.4)           | 0.1 (0.3)               | 0.1 (0.3)           |
| Farm size (acres)                   | 1.3 (1.2)           | 1.2 (1.1)               | 1.5** (1.5)          | 1.2 (1.0)               | 1.2 (1.0)           | 1.3 (1.2)               | 2.0*** (1.9)        |

DB, double burden of malnutrition; DB 1, adult is overweight/obese and micronutrient-deficient; n, sample size

Mean values are shown with standard deviations in parentheses. Differences in mean values are tested for significance: \*p < .1, \*\*p < .05, \*\*\*p < .01.
