# Supplementary material for: Various forms of double burden of malnutrition problems exist in rural Kenya
Source: Springer Nature journal article supplement (doi:10.1186/s12889-019-7882-y), 2019-11-21
Supplement: MOESM6 [file 12889_2019_7882_MOESM6_ESM.pdf]

**Additional Material A6**

**Table A6** Characteristics of children with and without individual-level DB

|                                  | All children       |                            |                      |                              |                        |                            |                       |                              |                         | Female Children            |                      |                             |                           |                             | Male Children             |                      |                             |                        |                           |                       |                             |                         |
|----------------------------------|--------------------|----------------------------|----------------------|------------------------------|------------------------|----------------------------|-----------------------|------------------------------|-------------------------|----------------------------|----------------------|-----------------------------|---------------------------|-----------------------------|---------------------------|----------------------|-----------------------------|------------------------|---------------------------|-----------------------|-----------------------------|-------------------------|
|                                  | Total<br>(n=184)   | Without<br>DB 2<br>(n=182) | With<br>DB2<br>(n=2) | Without<br>DB 2.1<br>(n=183) | With<br>DB2.1<br>(n=1) | Without<br>DB 3<br>(n=182) | With<br>DB 3<br>(n=2) | Without<br>DB 3.1<br>(n=182) | With<br>DB 3.1<br>(n=2) | Without<br>DB 2<br>(n=188) | With<br>DB2<br>(n=1) | Without<br>DB 2.1<br>(n=89) | Without<br>DB 3<br>(n=89) | Without<br>DB 3.1<br>(n=89) | Without<br>DB 2<br>(n=94) | With<br>DB2<br>(n=1) | Without<br>DB 2.1<br>(n=94) | With<br>DB2.1<br>(n=1) | Without<br>DB 3<br>(n=93) | With<br>DB 3<br>(n=2) | Without<br>DB 3.1<br>(n=93) | With<br>DB 3.1<br>(n=2) |
| Individual age (months)          | 35.5<br>(12.7)     | 35.6<br>(12.7)             | 22.5<br>(10.6)       | 35.3<br>(12.6)               | 59.0<br>(.)            | 35.5<br>(12.8)             | 34.5<br>(3.5)         | 35.5<br>(12.8)               | 34.5<br>(3.5)           | 34.3<br>(12.8)             | 15.0<br>(.)          | 34.1<br>(12.9)              | 34.1<br>(12.9)            | 34.1<br>(12.9)              | 36.8<br>(12.5)            | 30.0<br>(.)          | 36.5<br>(12.3)              | 59.0<br>(.)            | 36.8<br>(12.6)            | 34.5<br>(3.5)         | 36.8<br>(12.6)              | 34.5<br>(3.5)           |
| Breastfed (1/0)                  | 1.0<br>(0.2)       | 1.0<br>(0.2)               | 1.0<br>(0.0)         | 1.0<br>(0.2)                 | 1.0<br>(.)             | 1.0<br>(0.2)               | 1.0<br>(0.0)          | 1.0<br>(0.2)                 | 1.0<br>(0.0)            | 1.0<br>(0.2)               | 1.0<br>(.)           | 1.0<br>(0.2)                | 1.0<br>(0.2)              | 1.0<br>(0.2)                | 1.0<br>(0.2)              | 1.0<br>(.)           | 1.0<br>(0.2)                | 1.0<br>(.)             | 1.0<br>(0.2)              | 1.0<br>(0.0)          | 1.0<br>(0.2)                | 1.0<br>(0.0)            |
| Kisii county (1/0)               | 0.7<br>(0.5)       | 0.7<br>(0.5)               | 1.0<br>(0.0)         | 0.7<br>(0.5)                 | 1.0<br>(.)             | 0.7<br>(0.5)               | 0.5<br>(0.7)          | 0.7<br>(0.5)                 | 0.5<br>(0.7)            | 0.6<br>(0.5)               | 1.0<br>(.)           | 0.6<br>(0.5)                | 0.6<br>(0.5)              | 0.6<br>(0.5)                | 0.8<br>(0.4)              | 1.0<br>(.)           | 0.8<br>(0.4)                | 1.0<br>(.)             | 0.8<br>(0.4)              | 0.5<br>(0.7)          | 0.8<br>(0.4)                | 0.5<br>(0.7)            |
| Male household head (1/0)        | 0.8<br>(0.4)       | 0.8<br>(0.4)               | 1.0<br>(0.0)         | 0.8<br>(0.4)                 | 0.0<br>(.)             | 0.8<br>(0.4)               | 0.5<br>(0.7)          | 0.8<br>(0.4)                 | 0.5<br>(0.7)            | 0.8<br>(0.4)               | 1.0<br>(.)           | 0.8<br>(0.4)                | 0.8<br>(0.4)              | 0.8<br>(0.4)                | 0.8<br>(0.4)              | 1.0<br>(.)           | 0.8<br>(0.4)                | 0.0<br>(.)             | 0.8<br>(0.4)              | 0.5<br>(0.7)          | 0.8<br>(0.4)                | 0.5<br>(0.7)            |
| Age of household head (years)    | 46.5<br>(11.7)     | 46.4<br>(11.7)             | 53.5<br>(3.5)        | 46.4<br>(11.6)               | 66.0<br>(.)            | 46.3<br>(11.6)             | 62.0*<br>(15.6)       | 46.3<br>(11.6)               | 62.0*<br>(15.6)         | 46.3<br>(12.7)             | 51.0<br>(.)          | 46.3<br>(12.6)              | 46.3<br>(12.6)            | 46.3<br>(12.6)              | 46.6<br>(10.8)            | 56.0<br>(.)          | 46.5<br>(10.7)              | 66.0<br>(.)            | 46.3<br>(10.5)            | 62.0**<br>(15.6)      | 46.3<br>(10.5)              | 62.0**<br>(15.6)        |
| Farming occupation of head (1/0) | 0.6<br>(0.5)       | 0.6<br>(0.5)               | 0.5<br>(0.7)         | 0.6<br>(0.5)                 | 1.0<br>(.)             | 0.6<br>(0.5)               | 0.5<br>(0.7)          | 0.6<br>(0.5)                 | 0.5<br>(0.7)            | 0.6<br>(0.5)               | 0.0<br>(.)           | 0.6<br>(0.5)                | 0.6<br>(0.5)              | 0.6<br>(0.5)                | 0.6<br>(0.5)              | 1.0<br>(.)           | 0.6<br>(0.5)                | 1.0<br>(.)             | 0.6<br>(0.5)              | 0.5<br>(0.7)          | 0.6<br>(0.5)                | 0.5<br>(0.7)            |
| Education of head (years)        | 9.3<br>(3.4)       | 9.3<br>(3.4)               | 9.5<br>(3.5)         | 9.3<br>(3.3)                 | 2.0<br>(.)             | 9.4<br>(3.3)               | 2.0***<br>(2.8)       | 9.4<br>(3.3)                 | 2.0***<br>(2.8)         | 9.0<br>(3.2)               | 12.0<br>(.)          | 9.1<br>(3.2)                | 9.1<br>(3.2)              | 9.1<br>(3.2)                | 9.5<br>(3.6)              | 7.0<br>(.)           | 9.6<br>(3.5)                | 2.0<br>(.)             | 9.6<br>(3.4)              | 2.0***<br>(2.8)       | 9.6<br>(3.4)                | 2.0***<br>(2.8)         |
| Number of adults (count)         | 3.4<br>(1.5)       | 3.4<br>(1.5)               | 3.0<br>(0.0)         | 3.4<br>(1.5)                 | 6.0<br>(.)             | 3.4<br>(1.5)               | 4.0<br>(1.4)          | 3.4<br>(1.5)                 | 4.0<br>(1.4)            | 3.2<br>(1.5)               | 3.0<br>(.)           | 3.2<br>(1.4)                | 3.2<br>(1.4)              | 3.2<br>(1.4)                | 3.5<br>(1.5)              | 3.0<br>(.)           | 3.5<br>(1.5)                | 6.0<br>(.)             | 3.5<br>(1.5)              | 4.0<br>(1.4)          | 3.5<br>(1.5)                | 4.0<br>(1.4)            |
| Number of children (count)       | 2.5<br>(1.2)       | 2.5<br>(1.2)               | 2.0<br>(0.0)         | 2.5<br>(1.2)                 | 3.0<br>(.)             | 2.5<br>(1.2)               | 2.0<br>(1.4)          | 2.5<br>(1.2)                 | 2.0<br>(1.4)            | 2.5<br>(1.2)               | 2.0<br>(.)           | 2.4<br>(1.2)                | 2.4<br>(1.2)              | 2.4<br>(1.2)                | 2.6<br>(1.2)              | 2.0<br>(.)           | 2.6<br>(1.2)                | 3.0<br>(.)             | 2.6<br>(1.2)              | 2.0<br>(1.4)          | 2.6<br>(1.2)                | 2.0<br>(1.4)            |
| Income per capita in PPP \$/year | 3469.0<br>(3863.3) | 3444.9<br>(3876.0)         | 5638.2<br>(1662.3)   | 3483.8<br>(3868.8)           | 784.5<br>(.)           | 3486.5<br>(3877.3)         | 1893.2<br>(2345.1)    | 3486.5<br>(3877.3)           | 1893.2<br>(2345.1)      | 3521.0<br>(3979.7)         | 6813.6<br>(.)        | 3558.0<br>(3972.4)          | 3558.0<br>(3972.4)        | 3558.0<br>(3972.4)          | 3372.0<br>(3794.6)        | 4462.8<br>(.)        | 3412.0<br>(3786.4)          | 784.5<br>(.)           | 3416.5<br>(3802.6)        | 1893.2<br>(2345.1)    | 3416.5<br>(3802.6)          | 1893.2<br>(2345.1)      |
| Poverty rate (1/0)               | 0.2<br>(0.4)       | 0.2<br>(0.4)               | 0.0<br>(0.0)         | 0.2<br>(0.4)                 | 0.0<br>(.)             | 0.1<br>(0.4)               | 0.5<br>(0.7)          | 0.1<br>(0.4)                 | 0.5<br>(0.7)            | 0.2<br>(0.4)               | 0.0<br>(.)           | 0.2<br>(0.4)                | 0.2<br>(0.4)              | 0.2<br>(0.4)                | 0.1<br>(0.3)              | 0.0<br>(.)           | 0.1<br>(0.3)                | 0.0<br>(.)             | 0.1<br>(0.3)              | 0.5<br>(0.7)          | 0.1<br>(0.3)                | 0.5<br>(0.7)            |
| Farm size (acres)                | 1.3<br>(1.2)       | 1.3<br>(1.2)               | 1.9<br>(1.9)         | 1.3<br>(1.2)                 | 2.2<br>(.)             | 1.3<br>(1.2)               | 1.9<br>(1.5)          | 1.3<br>(1.2)                 | 1.9<br>(1.5)            | 1.3<br>(1.2)               | 0.5<br>(.)           | 1.3<br>(1.2)                | 1.3<br>(1.2)              | 1.3<br>(1.2)                | 1.2<br>(1.1)              | 3.3<br>(.)           | 1.2<br>(1.1)                | 2.2<br>(.)             | 1.2<br>(1.1)              | 1.9<br>(1.5)          | 1.2<br>(1.1)                | 1.9<br>(1.5)            |

DB, double burden of malnutrition; DB 2, child is overweight (BAZ > +2 SD) and micronutrient-deficient; DB 2.1, child is overweight (WHZ > + 2SD) and micronutrient-deficient; DB 3, child overweight (BAZ > +2 SD) and stunting (HAZ < - 2 SD); DB 3.1, child overweight (WHZ > +2 SD) and stunting (HAZ < - 2 SD); n, sample size

Mean values are shown with standard deviations in parentheses. Differences in mean values are tested for significance: \*p < .1, \*\*p < .05, \*\*\*p < .01.
