# Supplementary material for: Various forms of double burden of malnutrition problems exist in rural Kenya
Source: Springer Nature journal article supplement (doi:10.1186/s12889-019-7882-y), 2019-11-21
Supplement: MOESM7 [file 12889_2019_7882_MOESM7_ESM.pdf]

## Additional Material A7

**Table A7** Prevalence of household-level DB within different subsamples

|                                             | DB 4 |     | DB 5 |     | DB 6 |      | DB 7 |     | DB 8 |      |
|---------------------------------------------|------|-----|------|-----|------|------|------|-----|------|------|
|                                             | n    | %   | n    | %   | n    | %    | n    | %   | n    | %    |
| Household (n=173)                           | 1    | 0.6 | 5    | 2.9 | 22   | 12.7 | 1    | 0.6 | 30   | 17.3 |
| Households with two adults and child (n=72) | 0    | 0   | 2    | 2.8 | 11   | 15.3 | 0    | 0   | 20   | 27.8 |
| Male adult-child pair (n=81)                | 0    | 0   | 2    | 2.5 | 11   | 13.6 | 0    | 0   | 20   | 24.7 |
| Female adult-child pair (n=164)             | 1    | 0.6 | 5    | 3.1 | 22   | 13.4 | 1    | 0.6 | 30   | 18.3 |

DB, double burden of malnutrition; n, sample size

All DB definitions (DB 4-8) include adult overweight/obesity ( $BMI \geq 25.0$ ) and child undernutrition but differ in terms of the child undernutrition indicators used. DB 4, child underweight ( $BAZ < -2$  SD); DB 5, child underweight ( $WAZ < -2$  SD); DB 6, child stunting ( $HAZ < -2$  SD); DB 7, child wasting ( $WHZ < -2$  SD); DB 8, child is micronutrient-deficient.
