# Supplementary material for: Various forms of double burden of malnutrition problems exist in rural Kenya
Source: Springer Nature journal article supplement (doi:10.1186/s12889-019-7882-y), 2019-11-21
Supplement: MOESM8 [file 12889_2019_7882_MOESM8_ESM.pdf]

## Additional Material A8

**Table A8** Characteristics of households with and without household-level DB

|                                     | Total<br>(n=173)   | Without<br>DB 4<br>(n=172) | With<br>DB 4<br>(n=1) | Without<br>DB 5<br>(n=168) | With<br>DB 5<br>(n=5) | Without<br>DB 6<br>(n=151) | With<br>DB 6<br>(n=22) | Without<br>DB 7<br>(n=172) | With<br>DB 7<br>(n=1) | Without<br>DB 8<br>(n=143) | With<br>DB 8<br>(n=30) |
|-------------------------------------|--------------------|----------------------------|-----------------------|----------------------------|-----------------------|----------------------------|------------------------|----------------------------|-----------------------|----------------------------|------------------------|
| Kisii county (1/0)                  | 0.7 (0.5)          | 0.7 (0.5)                  | 1.0 (.)               | 0.7 (0.5)                  | 0.8 (0.4)             | 0.7 (0.5)                  | 0.7 (0.5)              | 0.7 (0.5)                  | 1.0 (.)               | 0.7 (0.5)                  | 0.8* (0.4)             |
| Male household head (1/0)           | 0.8 (0.4)          | 0.8 (0.4)                  | 0.0 (.)               | 0.8 (0.4)                  | 0.4***<br>(0.5)       | 0.8 (0.4)                  | 0.8 (0.4)              | 0.8 (0.4)                  | 0.0 (.)               | 0.8 (0.4)                  | 0.8 (0.4)              |
| Age of household head<br>(years)    | 46.4 (11.9)        | 46.3 (11.8)                | 66.0 (.)              | 46.4 (11.8)                | 47.8 (14.1)           | 46.5<br>(11.7)             | 45.6<br>(13.1)         | 46.3<br>(11.8)             | 66.0 (.)              | 45.5 (11.7)                | 50.8**<br>(11.6)       |
| Age of child (months)               | 35.9 (12.4)        | 35.8 (12.3)                | 59.0 (.)              | 35.6 (12.3)                | 45.0*<br>(16.2)       | 35.3<br>(12.2)             | 40.3*<br>(13.3)        | 35.8<br>(12.3)             | 59.0 (.)              | 35.0 (11.7)                | 40.1**<br>(15.0)       |
| Child breastfed (1/0)               | 1.0 (0.2)          | 1.0 (0.2)                  | 1.0 (.)               | 1.0 (0.2)                  | 0.8** (0.4)           | 1.0 (0.2)                  | 1.0 (0.2)              | 1.0 (0.2)                  | 1.0 (.)               | 1.0 (0.2)                  | 1.0 (0.0)              |
| Farming occupation of<br>head (1/0) | 0.6 (0.5)          | 0.6 (0.5)                  | 1.0 (.)               | 0.6 (0.5)                  | 1.0* (0.0)            | 0.6 (0.5)                  | 0.6 (0.5)              | 0.6 (0.5)                  | 1.0 (.)               | 0.6 (0.5)                  | 0.7 (0.4)              |
| Education of head (years)           | 9.3 (3.4)          | 9.4 (3.3)                  | 2.0 (.)               | 9.4 (3.4)                  | 6.4** (2.5)           | 9.4 (3.4)                  | 8.5 (3.5)              | 9.4 (3.3)                  | 2.0 (.)               | 9.5 (3.3)                  | 8.4* (3.7)             |
| Number of adults (count)            | 3.3 (1.5)          | 3.3 (1.4)                  | 6.0 (.)               | 3.3 (1.4)                  | 4.6* (1.7)            | 3.3 (1.5)                  | 3.6 (1.5)              | 3.3 (1.4)                  | 6.0 (.)               | 3.3 (1.5)                  | 3.6 (1.3)              |
| Number of children<br>(count)       | 2.5 (1.1)          | 2.5 (1.2)                  | 3.0 (.)               | 2.5 (1.2)                  | 2.6 (1.1)             | 2.4 (1.2)                  | 2.9*<br>(1.0)          | 2.5 (1.2)                  | 3.0 (.)               | 2.6 (1.2)                  | 2.0***<br>(1.0)        |
| Income per capita in PPP<br>\$/year | 3563.3<br>(3948.3) | 3579.6<br>(3954.2)         | 784.5<br>(.)          | 3525.5<br>(3836.9)         | 4816.0<br>(7297.8)    | 3513.0<br>(3747.1)         | 3922.2<br>(5267.7)     | 3579.6<br>(3954.2)         | 784.5<br>(.)          | 3323.2<br>(3598.6)         | 4691.6*<br>(5222.2)    |
| Poverty rate (1/0)                  | 0.2 (0.4)          | 0.2 (0.4)                  | 0.0 (.)               | 0.2 (0.4)                  | 0.2 (0.4)             | 0.2 (0.4)                  | 0.2 (0.4)              | 0.2 (0.4)                  | 0.0 (.)               | 0.2 (0.4)                  | 0.1 (0.3)              |
| Farm size (acres)                   | 1.3 (1.2)          | 1.3 (1.2)                  | 2.2 (.)               | 1.3 (1.2)                  | 1.4 (0.8)             | 1.3 (1.2)                  | 1.2 (1.0)              | 1.3 (1.2)                  | 2.2 (.)               | 1.1 (0.9)                  | 1.9***<br>(2.0)        |

DB, double burden of malnutrition; n, sample size

All DB definitions (DB 4-8) include adult overweight/obesity (BMI  $\geq 25.0$ ) and child undernutrition but differ in terms of the child undernutrition indicators used. DB 4, child underweight (BAZ  $< -2$  SD); DB 5, child underweight (WAZ  $< -2$  SD); DB 6, child stunting (HAZ  $< -2$  SD); DB 7, child wasting (WHZ  $< -2$  SD); DB 8, child is micronutrient-deficient.

Mean values are shown with standard deviations in parentheses. Differences in mean values are tested for significance: \*p < .1, \*\*p < .05, \*\*\*p < .01.
